# Supplementary material for: Vitamin D elicits tissue-specific isoform expression in Atlantic salmon muscles
Source: Research Square preprint supplement (doi:10.21203/rs.3.rs-6687362/v1), 2025-08-27
Supplement: Supplementary file 1 [file 3d07c4f59d22ca55409ef6ce.xlsx]

## Sheet: Sheet1
type	gene_ID	gene_name	description
gene	ENSSSAG00000044179	acta2	Actin alpha 2, smooth muscle
gene	ENSSSAG00000000156	acta1b	Actin alpha 1, skeletal muscle b
gene	ENSSSAG00000062181	ACTA1	Actin alpha 1, skeletal muscle
gene	ENSSSAG00000068379	acta2	Actin alpha 2, smooth muscle
gene	ENSSSAG00000007690	ACTA1	Actin alpha 1, skeletal muscle
gene	ENSSSAG00000120848	acta1b	Actin alpha 1, skeletal muscle b
gene	ENSSSAG00000077198	FILIP1	filamin A interacting protein 1
gene	ENSSSAG00000009487	FILIP1	filamin A interacting protein 1
gene	ENSSSAG00000071306	FILIP1	filamin A interacting protein 1
gene	ENSSSAG00000062100	FLNB	filamin B
gene	ENSSSAG00000044359	FLNA	filamin A
gene	ENSSSAG00000071574	FILIP1	filamin A interacting protein 1
gene	ENSSSAG00000084274	fblim1	filamin binding LIM protein 1
gene	ENSSSAG00000080643	fblim1	filamin binding LIM protein 1
gene	ENSSSAG00000119389	rflnb	refilin B
novel gene	ENSSSAG00000066886		filamin C, gamma b (actin binding protein 280)
novel gene	ENSSSAG00000046597		filamin C, gamma b (actin binding protein 280)
gene	ENSSSAG00000007931	rflna	refilin A
gene	ENSSSAG00000089349	rflna	refilin A
gene	ENSSSAG00000063443	fhl1a	four and a half LIM domains 1a
gene	ENSSSAG00000069744	fhl1	four and a half LIM domains 1b
gene	ENSSSAG00000076903	fhl1	Four and a half LIM domains protein 1
gene	ENSSSAG00000071677	csrp1	Cysteine and glycine-rich protein 1
gene	ENSSSAG00000110745	csrp2	cysteine and glycine-rich protein 2
gene	ENSSSAG00000065543	csrp3	cysteine and glycine-rich protein 3 (cardiac LIM protein)
gene	ENSSSAG00000073986	csrp3	cysteine and glycine-rich protein 3 (cardiac LIM protein)
gene	ENSSSAG00000102520	csrp1b	cysteine and glycine-rich protein 1b
gene	ENSSSAG00000037992	pdlim7	PDZ and LIM domain 7
gene	ENSSSAG00000075509	PDLIM5	PDZ and LIM domain 5a
gene	ENSSSAG00000103129	pdlim7	PDZ and LIM domain 7
gene	ENSSSAG00000052063	pdlim1	PDZ and LIM domain 1 (elfin)
gene	ENSSSAG00000040630	pdlim3a	PDZ and LIM domain 3a
gene	ENSSSAG00000072246	pdlim3	PDZ and LIM domain 3b
gene	ENSSSAG00000055455	pdik1l	PDLIM1 interacting kinase 1 like
gene	ENSSSAG00000106178	pdik1l	PDLIM1 interacting kinase 1 like
gene	ENSSSAG00000002083	pdlim5b	PDZ and LIM domain 5b
gene	ENSSSAG00000058065	PDLIM4	PDZ and LIM domain 4
gene	ENSSSAG00000006903	pdlim1	PDZ and LIM domain 1 (elfin)
gene	ENSSSAG00000054329	pdlim5b	PDZ and LIM domain 5b
gene	ENSSSAG00000072965	pdlim2	PDZ and LIM domain 2 (mystique)
gene	ENSSSAG00000066759	lmo4a	LIM domain only 4a
gene	ENSSSAG00000053715	lmo4b	LIM domain only 4b
gene	ENSSSAG00000031352	lmo7a	LIM domain 7a
gene	ENSSSAG00000052180	lmo2	LIM domain only 2 (rhombotin-like 1)
gene	ENSSSAG00000104871	lmo3	LIM domain only 3
gene	ENSSSAG00000091720	lmo3	LIM domain only 3
gene	ENSSSAG00000116225	lmo3
gene	ENSSSAG00000068503	RBTN1	LIM domain only 1
gene	ENSSSAG00000056384	rbtn1	Rhombotin-1
gene	ENSSSAG00000008828	limk2	LIM domain kinase 2
gene	ENSSSAG00000056048	limk2	LIM domain kinase 2
gene	ENSSSAG00000070455	limk1a	LIM domain kinase 1a
gene	ENSSSAG00000075100	limk1a	LIM domain kinase 1a
gene	ENSSSAG00000009766	fhl3	four and a half LIM domains 3
gene	ENSSSAG00000067236	fhl2	four and a half LIM domains 2
gene	ENSSSAG00000030148	fhl5	four and a half LIM domains 5
gene	ENSSSAG00000076903	fhl1	Four and a half LIM domains protein 1
gene	ENSSSAG00000069744	fhl1	four and a half LIM domains 1b
gene	ENSSSAG00000080837	FHL2	four and a half LIM domains 2
gene	ENSSSAG00000063443	fhl1a	four and a half LIM domains 1a
gene	ENSSSAG00000066603	fhl2b	four and a half LIM domains 2b
gene	ENSSSAG00000054289	fhl2b	four and a half LIM domains 2b
novel gene	ENSSSAG00000110756		four and a half LIM domains 3
gene	ENSSSAG00000064738	ankrd46b	ankyrin repeat domain 46b
gene	ENSSSAG00000079009	ankrd22	ankyrin repeat domain 22
gene	ENSSSAG00000062982	ANKRD55	ankyrin repeat domain 55
gene	ENSSSAG00000064834	ankrd12	ankyrin repeat domain 1
gene	ENSSSAG00000053961	ANKRD44	ankyrin repeat domain 44
gene	ENSSSAG00000009874	ankrd46b	ankyrin repeat domain 46b
gene	ENSSSAG00000041215	ANKRD6	ankyrin repeat domain 6
gene	ENSSSAG00000079087	ankrd1	ankyrin repeat domain 1b (cardiac muscle)
gene	ENSSSAG00000056140	ANKRD52	ankyrin repeat domain 52
gene	ENSSSAG00000039050	ankrd52a	ankyrin repeat domain 52a
gene	ENSSSAG00000039729	ANKRD6	ankyrin repeat domain 6
gene	ENSSSAG00000069051	ANKRD33	ankyrin repeat domain 33
gene	ENSSSAG00000073664	ankrd50	ankyrin repeat domain containing 50
gene	ENSSSAG00000078173	ankrd39	ankyrin repeat domain 39
gene	ENSSSAG00000099385	ankrd13b	ankyrin repeat domain 13B
gene	ENSSSAG00000120002	ankrd37	ankyrin repeat domain 37
gene	ENSSSAG00000070443	ankrd16	ankyrin repeat domain 16
gene	ENSSSAG00000077721	ANKRD33B	ankyrin repeat domain 33B
gene	ENSSSAG00000003084	ANKRD50	ankyrin repeat domain containing 50
gene	ENSSSAG00000065489	ankrd10b	ankyrin repeat domain 10b
gene	ENSSSAG00000111913	ankrd10a	ankyrin repeat domain 10a
gene	ENSSSAG00000071660	ankrd13a	ankyrin repeat domain 13A
gene	ENSSSAG00000081383	ANKRD44	ankyrin repeat domain 44
gene	ENSSSAG00000047201	ANKRD52	ankyrin repeat domain 52
gene	ENSSSAG00000052831	ANKRD52	ankyrin repeat domain 52
gene	ENSSSAG00000026781	ankrd10b	ankyrin repeat domain 10b
gene	ENSSSAG00000042478	ankrd13a	ankyrin repeat domain 13A
gene	ENSSSAG00000083032	ankrd13b	ankyrin repeat domain 13B
gene	ENSSSAG00000086124	ankrd29	ankyrin repeat domain 29
novel gene	ENSSSAG00000073022		ankyrin repeat domain 50-like
gene	ENSSSAG00000094422	ANKRD60	ankyrin repeat domain 60
gene	ENSSSAG00000095113	ankrd4	ankyrin repeat domain 45
gene	ENSSSAG00000098525	ankrd9	ankyrin repeat domain 9
gene	ENSSSAG00000091973	ankrd34bb	ankyrin repeat domain 34Bb
gene	ENSSSAG00000083291	ankrd9	ankyrin repeat domain 9
gene	ENSSSAG00000069435	ANKRD33B	ankyrin repeat domain 33B
gene	ENSSSAG00000068271	ankrd1b	ankyrin repeat domain 1b (cardiac muscle)
gene	ENSSSAG00000006002	ankrd16	ankyrin repeat domain 16
gene	ENSSSAG00000120678	ANKRD33B	ankyrin repeat domain 33B
gene	ENSSSAG00000111083	ANKRD33	ankyrin repeat domain 33B
novel gene	ENSSSAG00000066205		ankyrin repeat domain 6
gene	ENSSSAG00000102439	zyx	zyxin
gene	ENSSSAG00000041622	zyx	zyxin
gene	ENSSSAG00000069550	myoz1a	myozenin 1a
novel gene	ENSSSAG00000112901		myozenin 3a
gene	ENSSSAG00000015710	myoz2b	myozenin 2b
gene	ENSSSAG00000077833	myoz1b	myozenin 1b
gene	ENSSSAG00000005695	MYOZ2	myozenin 2b
gene	ENSSSAG00000074272	MYOZ2	myozenin 2
gene	ENSSSAG00000066344	myoz1b	myozenin 1b
gene	ENSSSAG00000102011	MYOZ2	myozenin 2
gene	ENSSSAG00000068303	myoz1a	myozenin 1a
novel gene	ENSSSAG00000106998		myozenin 3a
novel gene	ENSSSAG00000119643
novel gene	ENSSSAG00000095939		titin
novel gene	ENSSSAG00000105866		titin
gene	ENSSSAG00000075513	actc2	actin, alpha, cardiac muscle 2
gene	ENSSSAG00000113864	actc2	actin, alpha, cardiac muscle 2
gene	ENSSSAG00000076983	capza1b	capping actin protein of muscle Z-line subunit alpha 1b
gene	ENSSSAG00000045617	capza2	capping protein (actin filament) muscle Z-line alpha 2
gene	ENSSSAG00000070500	CAPZA2	capping actin protein of muscle Z-line subunit alpha 2
gene	ENSSSAG00000097483	capzb	capping actin protein of muscle Z-line subunit beta
gene	ENSSSAG00000111915	capzb	capping actin protein of muscle Z-line subunit beta
gene	ENSSSAG00000060985	tmod2	tropomodulin 2
gene	ENSSSAG00000070850	tmod4	tropomodulin 4 (muscle)
novel gene	ENSSSAG00000073718		tropomodulin 1
gene	ENSSSAG00000002372		tropomodulin 1
gene	ENSSSAG00000064484	LMOD3	leiomodin 3
novel gene	ENSSSAG00000064672		leiomodin 1b (smooth muscle)
gene	ENSSSAG00000078108	lmod2	leiomodin 2 (cardiac) a
gene	ENSSSAG00000072972	fmnl3	formin-like 3
gene	ENSSSAG00000005175	FMN1	formin 1
gene	ENSSSAG00000065661	fmnl3	formin-like 3
gene	ENSSSAG00000080709	fnbp1l	formin binding protein 1-like
gene	ENSSSAG00000102746	FMN1	formin 1
gene	ENSSSAG00000044422	FMN1	formin 1
gene	ENSSSAG00000100287	fnbp4	formin binding protein 4
gene	ENSSSAG00000075300	FMNL2	formin like 2
gene	ENSSSAG00000062755	fnbp1l	formin binding protein 1-like
gene	ENSSSAG00000071563	DIAPH2	diaphanous related formin 2
gene	ENSSSAG00000073205	FMN1	formin 1
gene	ENSSSAG00000091681	diaph3	diaphanous-related formin 3
novel gene	ENSSSAG00000074064		formin-like 2a
gene	ENSSSAG00000084823	DIAPH3	diaphanous-related formin 3
novel gene	ENSSSAG00000051355		FH2 domain containing 4
novel gene	ENSSSAG00000005436		formin-like 1a
gene	ENSSSAG00000002795		formin-like 1a
gene	ENSSSAG00000080313	NEB	nebulin
gene	ENSSSAG00000068711	NEB	nebulin
gene	ENSSSAG00000120873	lasp1	LIM and SH3 protein 1
gene	ENSSSAG00000108898	lasp1	LIM and SH3 protein 1
gene	ENSSSAG00000081504	XIRP2	xin actin binding repeat containing 2
novel gene	ENSSSAG00000041507		xin actin binding repeat containing 2a
gene	ENSSSAG00000074411	xirp1	xin actin binding repeat containing 1
novel gene	ENSSSAG00000081493		xin actin binding repeat containing 2b
novel gene	ENSSSAG00000107793		xin actin binding repeat containing 2a
gene	ENSSSAG00000069078	tpm2	tropomyosin 2 (beta)
gene	ENSSSAG00000105130	tpm4a	tropomyosin 4a
gene	ENSSSAG00000108555	TPM1	tropomyosin 1
gene	ENSSSAG00000007064	tpm3	tropomyosin 3
gene	ENSSSAG00000064967	tpm4b	tropomyosin 4
gene	ENSSSAG00000065232	TPM1	tropomyosin 1
gene	ENSSSAG00000009656	tpm3	tropomyosin 3
gene	ENSSSAG00000006864	tpm4	tropomyosin 4a
gene	ENSSSAG00000044930	tnnc1a	troponin C type 1a (slow)
gene	ENSSSAG00000036263	TNNC1	troponin C type 1a (slow)
novel gene	ENSSSAG00000050683	TNNC1
gene	ENSSSAG00000008497	tnnc2.2	troponin C2, fast skeletal type, tandem duplicate 2
gene	ENSSSAG00000066537	tnnc2.2	troponin C2, fast skeletal type, tandem duplicate 2
gene	ENSSSAG00000077005	MLRN	myosin light chain 12B
novel gene	ENSSSAG00000046843		myosin, heavy chain 14, non-muscle
gene	ENSSSAG00000089518	myl12.1	myosin, light chain 12, genome duplicate 1
gene	ENSSSAG00000075202	myl13	myosin, light chain 13
gene	ENSSSAG00000081625	MYO3B	myosin IIIB
gene	ENSSSAG00000101916	myl4	myosin, light chain 4, alkali; atrial, embryonic
gene	ENSSSAG00000071623	myo1cb	myosin Ic, paralog b
gene	ENSSSAG00000057363	MYO1C	myosin IC
gene	ENSSSAG00000071614	myo6a	myosin VI
gene	ENSSSAG00000006495	myo1d	myosin 1D
gene	ENSSSAG00000055619	myosin XVIIIA
gene	ENSSSAG00000057247	myh9a	myosin, heavy chain 9a, non-muscle
gene	ENSSSAG00000063830	MYO9A	myosin IXA
gene	ENSSSAG00000075107	mybphb	myosin binding protein Hb
novel gene	ENSSSAG00000101624		myosin heavy chain 10
gene	ENSSSAG00000117473	cmlc1	cardiac myosin light chain-1
gene	ENSSSAG00000069427	MYL7	myosin light chain 7
gene	ENSSSAG00000071742	mybphb	myosin binding protein Hb
gene	ENSSSAG00000066514	myo1eb	myosin IEb
gene	ENSSSAG00000074022	myo1ca	myosin Ic, paralog a
gene	ENSSSAG00000077285	myo6a	myosin VIa
gene	ENSSSAG00000079260	MYO1E	myosin IE
gene	ENSSSAG00000037698	MYH11	myosin heavy chain 11
gene	ENSSSAG00000065838	myo1g	myosin IG
novel gene	ENSSSAG00000082643		myosin heavy chain 10
gene	ENSSSAG00000069046	myo5b	myosin VB
gene	ENSSSAG00000007045	MYLK4	myosin light chain kinase family member 4
gene	ENSSSAG00000006022	myl6b	Myosin light polypeptide 6B
gene	ENSSSAG00000098515	MYH6	myosin heavy chain 6
gene	ENSSSAG00000120197	MYH6	myosin heavy chain 6
gene	ENSSSAG00000088510	MYH6	myosin heavy chain 6
gene	ENSSSAG00000072531	MYO1E	myosin IE
gene	ENSSSAG00000019460	MYO6	myosin VI
gene	ENSSSAG00000084474	myo1eb	myosin IEb
gene	ENSSSAG00000067094	myo3a	myosin IIIA
gene	ENSSSAG00000077553	MYO1H	myosin IH
gene	ENSSSAG00000061677	myl1	myosin, light chain 1, alkali; skeletal, fast
gene	ENSSSAG00000096767	MYL7	myosin light chain 7
novel gene	ENSSSAG00000067458	MLRN
gene	ENSSSAG00000071373	MYLK	myosin light chain kinase
gene	ENSSSAG00000117716	MYO5A	myosin VA
gene	ENSSSAG00000086297	MYLK4	myosin light chain kinase family member 4
gene	ENSSSAG00000046535	myl4	myosin, light chain 4, alkali; atrial, embryonic
gene	ENSSSAG00000048886	myl1	myosin, light chain 1, alkali; skeletal, fast
gene	ENSSSAG00000089471	MYH6	myosin heavy chain 6
gene	ENSSSAG00000009979	myo5b	myosin VB
gene	ENSSSAG00000120555	MYBPC3	myosin binding protein C3
gene	ENSSSAG00000008639	myo1g	myosin IG
gene	ENSSSAG00000076031	MYO18A	myosin XVIIIA
gene	ENSSSAG00000065313	mylk3	myosin light chain kinase 3
gene	ENSSSAG00000041634	mylz3	myosin, light polypeptide 3, skeletal muscle
gene	ENSSSAG00000067488	myo1d	myosin 1D
gene	ENSSSAG00000106662	mybpc2a	myosin binding protein Ca
novel gene	ENSSSAG00000080326		myosin, heavy chain b
gene	ENSSSAG00000002846	mylpfa	myosin light chain, phosphorylatable, fast skeletal muscle a
gene	ENSSSAG00000043158	mylpfa	myosin light chain, phosphorylatable, fast skeletal muscle a
gene	ENSSSAG00000003301	MYH11	myosin heavy chain 11
gene	ENSSSAG00000003533	mybpc1	myosin binding protein C1
gene	ENSSSAG00000005548	myo1f	myosin IF
gene	ENSSSAG00000047323	mybpc1	myosin binding protein C1
gene	ENSSSAG00000093426	mybpc2a	myosin binding protein Ca
gene	ENSSSAG00000099433	MYBPC3	myosin binding protein C3
gene	ENSSSAG00000068990	unc45a	unc-45 myosin chaperone A
novel gene	ENSSSAG00000040154		myosin light chain kinase family, member 4b
gene	ENSSSAG00000064806	carmil2	capping protein regulator and myosin 1 linker 2
gene	ENSSSAG00000092568	MYO16	myosin XVI
gene	ENSSSAG00000081725	myo7aa	myosin VIIAa
gene	ENSSSAG00000063313	myo1f	myosin IF
novel gene	ENSSSAG00000067283	MYL6
gene	ENSSSAG00000077301	MYO5A	myosin VA
gene	ENSSSAG00000041134	myo7aa	myosin VIIAa
gene	ENSSSAG00000086861	myh7	myosin heavy chain 7
gene	ENSSSAG00000031736	MYO16	myosin XVI
gene	ENSSSAG00000048795	carmil3	capping protein regulator and myosin 1 linker 3
gene	ENSSSAG00000055222	MYL3	myosin, light chain 13
gene	ENSSSAG00000058624	mylk3	myosin light chain kinase 3
novel gene	ENSSSAG00000051135		myosin XVB
novel gene	ENSSSAG00000094455		myosin, light chain kinase 5
gene	ENSSSAG00000070217	myh7l	myosin heavy chain 7-like
gene	ENSSSAG00000105849	myh9a	myosin, heavy chain 9a, non-muscle
gene	ENSSSAG00000000855		myosin VIIA
gene	ENSSSAG00000037707	carmil3	capping protein regulator and myosin 1 linker 3
gene	ENSSSAG00000109971	mylipb	myosin regulatory light chain interacting protein b
novel gene	ENSSSAG00000005404		myosin VIIBb
gene	ENSSSAG00000064331	myo19	myosin XIX
gene	ENSSSAG00000005650		myosin Ihb
novel gene	ENSSSAG00000108027		myosin, light chain kinase 5
gene	ENSSSAG00000034932	mbd3b	methyl-CpG binding domain protein 3b
gene	ENSSSAG00000048563	MYLIP	myosin regulatory light chain interacting protein
gene	ENSSSAG00000084178	mylipb	myosin regulatory light chain interacting protein b
novel gene	ENSSSAG00000095607		myosin, heavy chain 11b, smooth muscle
gene	ENSSSAG00000080375		myosin VIIA
gene	ENSSSAG00000042840		myosin VIIBb
gene	ENSSSAG00000070052		myosin XVIIIAb
novel gene	ENSSSAG00000068705		myosin phosphatase Rho interacting protein
novel gene	ENSSSAG00000111115		myosin, heavy chain 14, non-muscle
novel gene	ENSSSAG00000002011		myosin light chain kinase family, member 4a
novel gene	ENSSSAG00000041766		myosin, light polypeptide 3, skeletal muscle
novel gene	ENSSSAG00000091394		myosin, heavy chain 11b, smooth muscle
gene	ENSSSAG00000009450		myosin VC
gene	ENSSSAG00000041199		myosin X
novel gene	ENSSSAG00000048860		myosin XVIIIAa
novel gene	ENSSSAG00000075269		myosin phosphatase Rho interacting protein
gene	ENSSSAG00000074654	MYOM3	myomesin 3
gene	ENSSSAG00000076839	MYOM1	myomesin 1
gene	ENSSSAG00000010629	MYOM2
gene	ENSSSAG00000008716	MYOM2	myomesin 2
gene	ENSSSAG00000076408	MYOM1	myomesin 1
gene	ENSSSAG00000119139	myom2a	myomesin 2a
gene	ENSSSAG00000103289	myom2a	myomesin 2a
gene	ENSSSAG00000096317	obsl1a	obscurin like cytoskeletal adaptor 1a
novel gene	ENSSSAG00000053510		obscurin like cytoskeletal adaptor 1b
gene	ENSSSAG00000011852	capns1a	calpain, small subunit 1 a
gene	ENSSSAG00000056625	CAPN7	calpain 7
gene	ENSSSAG00000041081	capn8	calpain 8
gene	ENSSSAG00000007967	capn3a	calpain 3a, (p94)
gene	ENSSSAG00000112435	capn9	calpain 9
gene	ENSSSAG00000066255	capn10	calpain 10
gene	ENSSSAG00000038994	capn1b	calpain 1, (mu/I) large subunit b
gene	ENSSSAG00000062748	CAPN7	calpain 7
gene	ENSSSAG00000040279	capn2b	calpain 2, (m/II) large subunit b
gene	ENSSSAG00000116840	capn12	calpain 12
gene	ENSSSAG00000121073	CAPN11	calpain 11
gene	ENSSSAG00000071082	capn12	calpain 12
gene	ENSSSAG00000107905	capn12	calpain 12
gene	ENSSSAG00000040852	capn2a	calpain 2, (m/II) large subunit a
gene	ENSSSAG00000074137	can3	calpain 3b
novel gene	ENSSSAG00000059658		calpain 15
novel gene	ENSSSAG00000039372		calpain 5a
gene	ENSSSAG00000039784	CAN1	calpain 1
gene	ENSSSAG00000043405	CAN1	calpain 1
novel gene	ENSSSAG00000001142		calpain 5b
gene	ENSSSAG00000063104	ak4	adenylate kinase 4
gene	ENSSSAG00000008921	ak8	adenylate kinase 8
gene	ENSSSAG00000073251	ak7a	adenylate kinase 7a
gene	ENSSSAG00000081116	ak4	adenylate kinase 4
gene	ENSSSAG00000066338	ak2	adenylate kinase 2
gene	ENSSSAG00000055636	ak1	adenylate kinase 1
gene	ENSSSAG00000070025	KAD	adenylate kinase 1
gene	ENSSSAG00000008446	AK9	adenylate kinase 9
gene	ENSSSAG00000045547	ak7b	adenylate kinase 7b
gene	ENSSSAG00000040615	ak5	adenylate kinase 5
gene	ENSSSAG00000082095	ak3	adenylate kinase 3
gene	ENSSSAG00000074139	enog	Gamma-enolase
gene	ENSSSAG00000040499	eno1a	enolase 1a, (alpha)
gene	ENSSSAG00000120380	enoph1	enolase-phosphatase 1
gene	ENSSSAG00000070720	enosf1	enolase superfamily member 1
gene	ENSSSAG00000055658	enoph
gene	ENSSSAG00000070432	eno2	enolase 2
gene	ENSSSAG00000045045	eno3	enolase 3, (beta, muscle)
gene	ENSSSAG00000001960	eno4	enolase 4
novel gene	ENSSSAG00000080154		enolase 1b, (alpha)
gene	ENSSSAG00000078306	PFKP	phosphofructokinase, platelet
gene	ENSSSAG00000062061	PFKP	phosphofructokinase, platelet
gene	ENSSSAG00000067619	k6pp	6-phosphofructokinase type C
gene	ENSSSAG00000074134	pfkma	phosphofructokinase, muscle a
gene	ENSSSAG00000041512	pfkmb	phosphofructokinase, muscle b
gene	ENSSSAG00000067857	pfkmb	phosphofructokinase, muscle b
novel gene	ENSSSAG00000057094		phosphofructokinase, muscle a
gene	ENSSSAG00000052974		phosphofructokinase, liver a
gene	ENSSSAG00000078634	cap1	CAP, adenylate cyclase-associated protein 1 (yeast)
gene	ENSSSAG00000058188	cap2	cyclase associated actin cytoskeleton regulatory protein 2
gene	ENSSSAG00000016215	COF2
gene	ENSSSAG00000077295	COF2
gene	ENSSSAG00000119678	cfl2	cofilin 2 (muscle)
gene	ENSSSAG00000070963	cfl2	cofilin 2 (muscle)
gene	ENSSSAG00000041271	COF2
gene	ENSSSAG00000040393	COF2	cofilin 1
gene	ENSSSAG00000003524	VCL	vinculin
gene	ENSSSAG00000058337	VCL	vinculin
gene	ENSSSAG00000046724	tln2a	talin 2a
gene	ENSSSAG00000063331	tln1	talin 1
gene	ENSSSAG00000073168	tln2a	talin 2a
gene	ENSSSAG00000065464	TLN2	talin 2
gene	ENSSSAG00000076319	TLN2	talin 2
gene	ENSSSAG00000039442	itgb1a	integrin, beta 1a
gene	ENSSSAG00000080528	itgb5	integrin, beta 5
gene	ENSSSAG00000073644	ITGA7	integrin subunit alpha 7
novel gene	ENSSSAG00000076400		integrin, beta 7
gene	ENSSSAG00000040699	ITGA1	integrin subunit alpha 1
gene	ENSSSAG00000078815	ITGA4	integrin subunit alpha 4
gene	ENSSSAG00000006725	itga6b	integrin, alpha 6b
gene	ENSSSAG00000044455	itgb1bp1	integrin beta 1 binding protein 1
gene	ENSSSAG00000058863	ITGA7	integrin subunit alpha 7
gene	ENSSSAG00000058977	ilk	integrin linked kinase
gene	ENSSSAG00000102694	itga11a	integrin, alpha 11a
gene	ENSSSAG00000067105	itgb5	integrin, beta 5
gene	ENSSSAG00000046837	itgb3a	integrin beta 3a
gene	ENSSSAG00000069787	ITGA6	integrin subunit alpha 6
gene	ENSSSAG00000001418	itgb3a	integrin beta 3a
gene	ENSSSAG00000007621	ITGB1	integrin subunit beta 1
gene	ENSSSAG00000075460	itgav	integrin, alpha V
gene	ENSSSAG00000120022	itga5	integrin, alpha 5 (fibronectin receptor, alpha polypeptide)
gene	ENSSSAG00000066104	itga6b	integrin, alpha 6b
gene	ENSSSAG00000044364	itgbl1	integrin, beta-like 1
gene	ENSSSAG00000037674	ITGA2	integrin subunit alpha 2
gene	ENSSSAG00000095960	mibp	muscle-specific beta 1 integrin binding protein
novel gene	ENSSSAG00000041458		integrin, beta 7
gene	ENSSSAG00000006192	ITGB1	integrin subunit beta 1
gene	ENSSSAG00000050579	itga2b	integrin, alpha 2b
gene	ENSSSAG00000109279		integrin, beta 8
gene	ENSSSAG00000073335	mibp	muscle-specific beta 1 integrin binding protein
gene	ENSSSAG00000051488	itga2b	integrin, alpha 2b
gene	ENSSSAG00000094870	cib3	calcium and integrin binding family member 3
gene	ENSSSAG00000048382	ITGB6	integrin subunit beta 6
gene	ENSSSAG00000048382	ITGB6	integrin subunit beta 6
gene	ENSSSAG00000080301	itgb1a	integrin, beta 1a
gene	ENSSSAG00000055802	itfg2	integrin alpha FG-GAP repeat containing 2
gene	ENSSSAG00000010010	ITGA2	integrin subunit alpha 2
gene	ENSSSAG00000003063	itga9	integrin, alpha 9
gene	ENSSSAG00000065857	ITGA11	integrin subunit alpha 11
gene	ENSSSAG00000053761	ITGA6	integrin subunit alpha 6
gene	ENSSSAG00000082935	itga11a	integrin, alpha 11a
gene	ENSSSAG00000046328	ITGB6	integrin subunit beta 6
gene	ENSSSAG00000119547	ITGA10	integrin subunit alpha 10
gene	ENSSSAG00000098283	itga5	integrin, alpha 5 (fibronectin receptor, alpha polypeptide)
gene	ENSSSAG00000040941	itga9	integrin, alpha 9
gene	ENSSSAG00000063506	ITFG1	integrin alpha FG-GAP repeat containing 1
gene	ENSSSAG00000063909	ITFG1	integrin alpha FG-GAP repeat containing 1
novel gene	ENSSSAG00000076346	itgae
gene	ENSSSAG00000053873	itga3b	integrin, alpha 3b
gene	ENSSSAG00000064161	itga4	integrin subunit alpha 4
novel gene	ENSSSAG00000065365	itgb4
novel gene	ENSSSAG00000003604		integrin, alpha 8
novel gene	ENSSSAG00000007494		integrin, alpha 1
gene	ENSSSAG00000040232	itgav	integrin, alpha V
gene	ENSSSAG00000022772		integrin, beta 2
gene	ENSSSAG00000116695	FERMT3	FERM domain containing kindlin 3
gene	ENSSSAG00000042854		integrin, alpha 8
gene	ENSSSAG00000008070	vcam1b	vascular cell adhesion molecule 1b
gene	ENSSSAG00000077245	NRK2	muscle-specific beta 1 integrin binding protein 2
gene	ENSSSAG00000043624	vcam1b	vascular cell adhesion molecule 1b
gene	ENSSSAG00000068654	nrk2	muscle-specific beta 1 integrin binding protein 2
gene	ENSSSAG00000072632	FERMT1	FERM domain containing kindlin 1
gene	ENSSSAG00000005926	URP2	FERM domain containing kindlin 3
novel gene	ENSSSAG00000006821		FYN binding protein b
novel gene	ENSSSAG00000067161		integrin, beta 2
novel gene	ENSSSAG00000060934		nischarin
gene	ENSSSAG00000074513	fyb	FYN-binding protein
gene	ENSSSAG00000101985	URP2	FERM domain containing kindlin 3b
gene	ENSSSAG00000067850	FERMT1	FERM domain containing kindlin 1
gene	ENSSSAG00000064304	drp2	dystrophin related protein 2
gene	ENSSSAG00000077898	drp2	dystrophin related protein 2
gene	ENSSSAG00000005871	sgcd	sarcoglycan, delta (dystrophin-associated glycoprotein)
gene	ENSSSAG00000058211	sgcd	sarcoglycan, delta (dystrophin-associated glycoprotein)
gene	ENSSSAG00000101387	sgcb	sarcoglycan, beta (dystrophin-associated glycoprotein)
gene	ENSSSAG00000063370	sspn	sarcospan (Kras oncogene-associated gene)
gene	ENSSSAG00000079166	dag1	dystroglycan 1
gene	ENSSSAG00000110356	dag1	dystroglycan 1
gene	ENSSSAG00000078004	sgcg	sarcoglycan, gamma
gene	ENSSSAG00000101080	SGCZ	sarcoglycan zeta
gene	ENSSSAG00000077995	SGCG	sarcoglycan gamma
gene	ENSSSAG00000065720	sgce	sarcoglycan, epsilon
gene	ENSSSAG00000042188	SGCZ	sarcoglycan zeta
novel gene	ENSSSAG00000069941		sarcoglycan, alpha
gene	ENSSSAG00000047882	sgce	sarcoglycan, epsilon
gene	ENSSSAG00000070459	dtna	dystrobrevin, alpha
gene	ENSSSAG00000081677	dtna	dystrobrevin, alpha
gene	ENSSSAG00000093448	dtnbb	dystrobrevin, beta b
gene	ENSSSAG00000117898	dtnbb	dystrobrevin, beta b
gene	ENSSSAG00000107512	dtnbp1b	dystrobrevin binding protein 1b
gene	ENSSSAG00000002103	dtnbp1a	dystrobrevin binding protein 1a
gene	ENSSSAG00000021623	dtnbp1b	dystrobrevin binding protein 1b
gene	ENSSSAG00000090448	SNTA1	syntrophin alpha 1
novel gene	ENSSSAG00000120224		syntrophin, beta 2
gene	ENSSSAG00000106832	sntb1	syntrophin, basic 1
novel gene	ENSSSAG00000033083		syntrophin, beta 2
gene	ENSSSAG00000038787	SNTG1	syntrophin gamma 1
gene	ENSSSAG00000071111	SNTG1	syntrophin gamma 1
gene	ENSSSAG00000118778	sntb1	syntrophin, basic 1
gene	ENSSSAG00000079280	cdh2	adherin 2, type 1, N-cadherin (neuronal)
gene	ENSSSAG00000049983	cdh2	cadherin 2, type 1, N-cadherin (neuronal)
gene	ENSSSAG00000091484	ctnnb1	catenin (cadherin-associated protein), beta 1
gene	ENSSSAG00000064355	CTNNBL1	catenin beta like 1
gene	ENSSSAG00000008013	ctnna2	catenin (cadherin-associated protein), alpha 2
gene	ENSSSAG00000069468	ctnnd2b	catenin (cadherin-associated protein), delta 2b
gene	ENSSSAG00000108396	ctnnb1	catenin (cadherin-associated protein), beta 1
gene	ENSSSAG00000095386	CTNND2	catenin delta 2
gene	ENSSSAG00000003813	ctnna2	catenin (cadherin-associated protein), alpha 2
gene	ENSSSAG00000047789	ctnnd2b	catenin (cadherin-associated protein), delta 2b
gene	ENSSSAG00000013753	cby1	chibby homolog 1 (Drosophila)
gene	ENSSSAG00000078103	ctbl1	Beta-catenin-like protein 1
gene	ENSSSAG00000081080	ARVCF	ARVCF delta catenin family member
gene	ENSSSAG00000070791	ARVCF	ARVCF delta catenin family member
gene	ENSSSAG00000077655	CTNND2	catenin delta 2
gene	ENSSSAG00000071445	dact1	dishevelled binding antagonist of beta catenin 1
gene	ENSSSAG00000116184	cby1	chibby homolog 1 (Drosophila)
gene	ENSSSAG00000039982	dact1	dishevelled-binding antagonist of beta-catenin 1
novel gene	ENSSSAG00000003678		catenin (cadherin-associated protein), delta 1
novel gene	ENSSSAG00000063454		ARVCF delta catenin family member a
gene	ENSSSAG00000000743		ARVCF delta catenin family member a
gene	ENSSSAG00000080170	lzic	leucine zipper and CTNNBIP1 domain containing
novel gene	ENSSSAG00000006226		APC regulator of WNT signaling pathway 2
gene	ENSSSAG00000042529	BCL9	BCL9 transcription coactivator
gene	ENSSSAG00000063108	BCL9	BCL9 transcription coactivator
gene	ENSSSAG00000047367	apc2	APC regulator of WNT signaling pathway 2
gene	ENSSSAG00000007293	bcl9	BCL9 transcription coactivator
gene	ENSSSAG00000042658	bcl9	BCL9 transcription coactivator
gene	ENSSSAG00000065431	med12	mediator complex subunit 12
gene	ENSSSAG00000053205	plak	Junction plakoglobin
novel gene	ENSSSAG00000008164		junction plakoglobin b
gene	ENSSSAG00000041828	PLAK	junction plakoglobin a
gene	ENSSSAG00000071648	PKP1	plakophilin 1
gene	ENSSSAG00000076999	PKP1	plakophilin 1
gene	ENSSSAG00000076701	PKP4	plakophilin 4
novel gene	ENSSSAG00000060561		plakophilin 3b
gene	ENSSSAG00000075857	PKP4	plakophilin 4
novel gene	ENSSSAG00000066245		plakophilin 4
gene	ENSSSAG00000005238	pkp3	plakophilin 3b
novel gene	ENSSSAG00000053659		plakophilin 4
gene	ENSSSAG00000014553	dspb	desmoplakin b
gene	ENSSSAG00000079718	dspa	desmoplakin a
gene	ENSSSAG00000001063	dspa	desmoplakin a
gene	ENSSSAG00000106067	cnstb	consortin, connexin sorting protein b
gene	ENSSSAG00000009793	gja9b	gap junction protein alpha 9b
novel gene	ENSSSAG00000065568		gap junction protein alpha 9b
gene	ENSSSAG00000042741	gja5b	gap junction protein, alpha 5b
gene	ENSSSAG00000063143	gja8a	gap junction protein alpha 8 paralog a
gene	ENSSSAG00000001930	gjb3	gap junction protein beta 3
gene	ENSSSAG00000078891	GJD4	gap junction protein delta 4
gene	ENSSSAG00000042422	GJA10	gap junction protein alpha 10
gene	ENSSSAG00000042447	gja8a	gap junction protein alpha 8 paralog a
gene	ENSSSAG00000045004	GJA10	gap junction protein alpha 10
gene	ENSSSAG00000094186	gja2	gap junction protein, alpha 2
gene	ENSSSAG00000095274	gja4	gap junction protein alpha 4
gene	ENSSSAG00000102427	gja11	gap junction protein, alpha 11
gene	ENSSSAG00000103454	gjb9a	gap junction protein beta 9a
gene	ENSSSAG00000104779	cx32	Gap junction Cx32.2 protein
gene	ENSSSAG00000105322	GJA3	gap junction protein alpha 3
gene	ENSSSAG00000105529	GJA3	gap junction protein alpha 3
gene	ENSSSAG00000116438	gja2	gap junction protein, alpha 2
gene	ENSSSAG00000082489	gjb7	gap junction protein beta 7
novel gene	ENSSSAG00000086489		gap junction protein alpha 9
gene	ENSSSAG00000084205	gjb1a	gap junction protein beta 1a
novel gene	ENSSSAG00000108800		gap junction protein alpha 9
gene	ENSSSAG00000101148	gja8b	gap junction protein alpha 8 paralog b
gene	ENSSSAG00000097893	gjd1a	gap junction protein delta 1a
gene	ENSSSAG00000098898	gja1b	gap junction protein alpha 1b
novel gene	ENSSSAG00000091385		gap junction protein, alpha 12.1
gene	ENSSSAG00000114330	GJD4	gap junction protein delta 4
gene	ENSSSAG00000118009	gjb8	gap junction protein beta 8
gene	ENSSSAG00000085159		gap junction protein delta 2b
gene	ENSSSAG00000068768	gjb1a	gap junction protein beta 1a
gene	ENSSSAG00000105948	gjc4b	gap junction protein gamma 4b
gene	ENSSSAG00000007356	gja8b	gap junction protein alpha 8 paralog b
gene	ENSSSAG00000059516	gjc4b	gap junction protein gamma 4b
gene	ENSSSAG00000060293	gjb8	gap junction protein beta 8
gene	ENSSSAG00000061045	gjb9a	gap junction protein beta 9a
gene	ENSSSAG00000115801	gjb7	gap junction protein beta 7
gene	ENSSSAG00000108381	gja3	gap junction protein, alpha 3
gene	ENSSSAG00000042461	GJA5	gap junction protein, alpha 5a
gene	ENSSSAG00000099876	gja1b	gap junction protein alpha 1b
gene	ENSSSAG00000103272	gje1a	gap junction protein epsilon 1a
gene	ENSSSAG00000119255	GJA5	gap junction protein, alpha 5a
gene	ENSSSAG00000120117	gja3	gap junction protein, alpha 3
gene	ENSSSAG00000107769	gje1a	gap junction protein epsilon 1a
gene	ENSSSAG00000120725	gja5b	gap junction protein, alpha 5b
gene	ENSSSAG00000040563	desma	desmin a
gene	ENSSSAG00000101128	desma	desmin a
gene	ENSSSAG00000073113	vim	vimentin
gene	ENSSSAG00000007973	krt4	keratin 4
gene	ENSSSAG00000120869	krt5	keratin 5
gene	ENSSSAG00000048424	krt15	keratin 15
gene	ENSSSAG00000053064	krt99	keratin 99
gene	ENSSSAG00000067586	krt4	keratin 4
gene	ENSSSAG00000074245	k2c8	Keratin, type II cytoskeletal 8
gene	ENSSSAG00000067593	krt18b	keratin 18b
gene	ENSSSAG00000045107	krt15	keratin 15
gene	ENSSSAG00000064465	krt8	keratin 8
novel gene	ENSSSAG00000098959		trichoplein, keratin filament binding
gene	ENSSSAG00000007948	krt18b	keratin 18b
gene	ENSSSAG00000064508	krt18a.1	keratin 18a, tandem duplicate 1
gene	ENSSSAG00000051749	krt15	keratin 15
gene	ENSSSAG00000067470	krt1-c5	keratin, type 1, gene c5
gene	ENSSSAG00000048393	krt98	keratin 98
gene	ENSSSAG00000074296	krt18a.1	keratin 18a, tandem duplicate 1
gene	ENSSSAG00000048512	krt15	keratin 15
gene	ENSSSAG00000051714	krt15	keratin 15
gene	ENSSSAG00000053104	krt99	keratin 99
gene	ENSSSAG00000074300	krt18a.1	keratin 18a, tandem duplicate 2
gene	ENSSSAG00000045036	krt99	keratin 99
gene	ENSSSAG00000045136	krt15
gene	ENSSSAG00000045452	krt15	keratin 15
gene	ENSSSAG00000050082	si:ch211-243g18.2	Keratin, type I cytoskeletal 18
gene	ENSSSAG00000006317	krt1-c5	keratin, type 1, gene c5
gene	ENSSSAG00000008349	LMNA	lamin A/C
gene	ENSSSAG00000035636	lmnb1	lamin B1
gene	ENSSSAG00000072180	LMNA	lamin A/C
gene	ENSSSAG00000044615	lbr	lamin B receptor
gene	ENSSSAG00000076862	lbr	lamin B receptor
gene	ENSSSAG00000043402	lmnb2	lamin B2
