# Supplementary material for: Vitamin D elicits tissue-specific isoform expression in Atlantic salmon muscles
Source: Research Square preprint supplement (doi:10.21203/rs.3.rs-6687362/v1), 2025-08-27
Supplement: Supplementary file 2 [file f3de7a5b88ddba3031af2432.xlsx]

## Sheet: Supporting Info 1 - DGE
muscle	gene_id	gene_name	baseMean	log2FoldChange	lfcSE	pvalue	padj	muscle_gene
Adductor mandibulae	ENSSSAG00000112871		23.7085	-4.30691	0.61508	8.6025e-14	2.73517e-09
Adductor mandibulae	ENSSSAG00000112053		52.0433	-3.0775	0.912775	7.25086e-06	0.0329344
Adductor mandibulae	ENSSSAG00000069346	SCARA5	148.469	-0.928029	0.207219	3.41795e-07	0.00362245
Adductor mandibulae	ENSSSAG00000008285		58.8512	-0.00203939	0.0287449	6.26202e-07	0.00497753
Adductor mandibulae	ENSSSAG00000105947		20.8361	-0.00200777	0.0287418	3.04828e-08	0.0004846
Adductor mandibulae	ENSSSAG00000005415		8046.66	1.22098	0.288177	8.82961e-07	0.00561475
Adductor mandibulae	ENSSSAG00000099524	nfil3-5	429.217	1.39269	0.377879	8.29074e-06	0.0329505
Adductor mandibulae	ENSSSAG00000098888		102.857	1.50903	0.40181	2.87424e-06	0.0152311
Filet	ENSSSAG00000059264		24.1393	2.54613	0.647356	1.81234e-06	0.0288036
Filet	ENSSSAG00000001874		14.3545	3.83939	0.835005	1.72862e-07	0.00549458
Heart	ENSSSAG00000085492	ift70	101.876	-1.966	0.591405	6.25848e-06	0.00223991
Heart	ENSSSAG00000073978		64.8634	-1.85633	0.466245	2.07646e-06	0.000990888
Heart	ENSSSAG00000099623	fkbp5	844.718	-1.85247	0.839836	0.000171679	0.0148058
Heart	ENSSSAG00000077252		54.0337	-1.66279	0.348727	6.39824e-08	9.64181e-05
Heart	ENSSSAG00000073280	klf15	509.63	-1.65709	0.589672	9.94884e-05	0.0106687
Heart	ENSSSAG00000114353	fahd1	69.3215	-1.54491	0.290485	3.68211e-09	9.58421e-06
Heart	ENSSSAG00000064884	chordc1a	78.8897	-1.46941	0.511649	8.43434e-05	0.00960358
Heart	ENSSSAG00000069706	CP1A1	179.327	-1.38979	0.542138	0.000314627	0.020335
Heart	ENSSSAG00000000959	gys1	829.335	-1.38318	0.360139	2.90214e-06	0.00124021
Heart	ENSSSAG00000120793		170.405	-1.37955	0.685164	0.000538681	0.0268702
Heart	ENSSSAG00000004801	lrat	300.572	-1.34253	0.400446	2.9741e-05	0.00571506
Heart	ENSSSAG00000066339		1430.94	-1.3267	0.69597	0.000769447	0.032931
Heart	ENSSSAG00000105729	bag4	439.778	-1.31759	0.520596	0.000193595	0.0154956
Heart	ENSSSAG00000071289	FRMD3	155.146	-1.31361	0.501386	0.000251999	0.0180541
Heart	ENSSSAG00000042664	gys1	3388.21	-1.30707	0.367073	9.18952e-06	0.00284309
Heart	ENSSSAG00000007690	acta1	5598.16	-1.26412	0.583011	0.000435027	0.0239994	x
Heart	ENSSSAG00000010242	pygma	950.034	-1.2126	0.409684	9.7479e-05	0.010572
Heart	ENSSSAG00000015572		34.4097	-1.20693	0.520056	0.000607392	0.0289325
Heart	ENSSSAG00000007989		1116.95	-1.17389	0.323595	1.14962e-05	0.00322705
Heart	ENSSSAG00000080069		848.255	-1.15756	0.467477	0.000331942	0.0211674
Heart	ENSSSAG00000110735	aspdh	464.868	-1.15548	0.363031	4.47964e-05	0.00688124
Heart	ENSSSAG00000077766		244.4	-1.14009	0.442772	0.000266947	0.0184274
Heart	ENSSSAG00000059816	HEM1	5064.95	-1.13949	0.373283	6.40394e-05	0.00822279
Heart	ENSSSAG00000120478	tdh	172.178	-1.13774	0.204331	1.2336e-09	4.41504e-06
Heart	ENSSSAG00000062181	acta1	44028.6	-0.825514	0.329189	0.000388178	0.022613	x
Heart	ENSSSAG00000121856	PTPRR	49.4288	-1.11426	0.453514	0.000371862	0.0222744
Heart	ENSSSAG00000006165	tfr1b	1719.12	-1.10422	0.45959	0.000357957	0.0219119
Heart	ENSSSAG00000074489	lrpprc	2111.25	-1.10143	0.237653	1.61334e-07	0.000184772
Heart	ENSSSAG00000096845	ADAMTS8	2200.94	-1.08791	0.494149	0.000588413	0.0282202
Heart	ENSSSAG00000098222		36.6379	-1.07503	0.475199	0.000649723	0.0299563
Heart	ENSSSAG00000053814	cyp1b1	348.938	-1.07327	0.397577	0.000218274	0.0167845
Heart	ENSSSAG00000105677		190.752	-1.07103	0.342981	6.69127e-05	0.00836614
Heart	ENSSSAG00000039751	IGFBP-5A	90.9668	-1.06945	0.33122	4.70037e-05	0.00689281
Heart	ENSSSAG00000014558	cacna1sa	95.1424	-1.06707	0.552141	0.00112609	0.0419273
Heart	ENSSSAG00000113427		117.189	-1.067	0.376296	0.000119426	0.0120827
Heart	ENSSSAG00000110442		110.396	-1.05558	0.358836	0.000105172	0.0109502
Heart	ENSSSAG00000068056	DPYSL2	79.5907	-1.04848	0.315323	3.52189e-05	0.00604864
Heart	ENSSSAG00000093278		58.8229	-1.0138	0.340115	0.000107305	0.0111318
Heart	ENSSSAG00000100414		86.431	-1.00448	0.507208	0.00123378	0.0441018
Heart	ENSSSAG00000117027		98.02	-1.0026	0.466089	0.00086256	0.0356891
Heart	ENSSSAG00000008911		1306.75	-1.00005	0.244927	1.89226e-06	0.000967484
Heart	ENSSSAG00000115696		27.4037	-0.993146	0.37629	0.000288675	0.0192339
Heart	ENSSSAG00000093493		133.756	-0.989172	0.369129	0.000258428	0.0181656
Heart	ENSSSAG00000074536	adck1	109.878	-0.988351	0.279606	1.63345e-05	0.00402727
Heart	ENSSSAG00000116058	xylt1	73.1587	-0.986478	0.29229	2.95234e-05	0.00571506
Heart	ENSSSAG00000085940	opa3	89.4575	-0.985936	0.227427	6.24019e-07	0.000533277
Heart	ENSSSAG00000013753	cby1	116.036	0.609178	0.273261	0.00107023	0.0404468	x
Heart	ENSSSAG00000116744	slc7a10a	35.3015	-0.974282	0.501041	0.00106298	0.0403117
Heart	ENSSSAG00000003721	CAVIN1	1612.68	-0.967864	0.391918	0.000394978	0.0228465
Heart	ENSSSAG00000059116		30.3216	-0.966017	0.303536	6.21184e-05	0.00811295
Heart	ENSSSAG00000090105	fam210ab	416.867	-0.965913	0.377277	0.000365033	0.0220312
Heart	ENSSSAG00000013302		166.931	-0.963637	0.305842	5.9221e-05	0.00792786
Heart	ENSSSAG00000030661	AATM	4902.72	-0.945968	0.309383	8.47373e-05	0.00960358
Heart	ENSSSAG00000067808		1331.79	-0.945817	0.171192	1.69302e-09	5.38606e-06
Heart	ENSSSAG00000080327	abcb9	78.9084	-0.945288	0.281938	3.07505e-05	0.00579506
Heart	ENSSSAG00000092642	smim12	448.442	-0.937061	0.199691	1.15815e-07	0.000144175
Heart	ENSSSAG00000078313		5153.5	-0.921297	0.309807	0.000101599	0.0107642
Heart	ENSSSAG00000010155		423.758	-0.912557	0.261292	2.10161e-05	0.00462263
Heart	ENSSSAG00000120620		114.458	-0.911647	0.281387	4.82141e-05	0.00690233
Heart	ENSSSAG00000081733	frem2b	309.9	-0.908256	0.190975	9.44622e-08	0.000128682
Heart	ENSSSAG00000107464		1767.12	-0.902405	0.277725	4.73529e-05	0.00689281
Heart	ENSSSAG00000097278		150.52	-0.888783	0.235291	7.31704e-06	0.00242521
Heart	ENSSSAG00000113846	mri1	134.403	-0.888204	0.269904	4.30595e-05	0.00684933
Heart	ENSSSAG00000068507		158.323	-0.888113	0.168996	7.79959e-09	1.59513e-05
Heart	ENSSSAG00000081432	hspd1	1413.24	-0.883042	0.325215	0.000235257	0.0173734
Heart	ENSSSAG00000051502	slc16a1a	784.971	-0.873122	0.214115	2.17034e-06	0.00101871
Heart	ENSSSAG00000069678		479.526	-0.872637	0.278346	6.43303e-05	0.00822279
Heart	ENSSSAG00000010741	mettl15	37.0838	-0.870581	0.281857	8.95727e-05	0.00994049
Heart	ENSSSAG00000057291	lpin1a	190.556	-0.868834	0.261501	3.91113e-05	0.00651067
Heart	ENSSSAG00000070772		6792.71	-0.863115	0.292395	0.000122698	0.012259
Heart	ENSSSAG00000117697		63.693	-0.859443	0.309295	0.000218658	0.0167845
Heart	ENSSSAG00000101039		201.565	-0.858706	0.274668	6.87728e-05	0.00856132
Heart	ENSSSAG00000087616		5469.07	-0.853241	0.371503	0.000655746	0.0300473
Heart	ENSSSAG00000003539		3772.65	-0.850623	0.262098	4.81854e-05	0.00690233
Heart	ENSSSAG00000046083		803.067	-0.848741	0.261435	4.05047e-05	0.00662703
Heart	ENSSSAG00000040563	desma	1622.98	-0.9812	0.334346	0.000129272	0.0126471	x
Heart	ENSSSAG00000043647	cspg4	187.563	-0.847199	0.259556	4.4665e-05	0.00688124
Heart	ENSSSAG00000043495		39.0636	-0.843096	0.250225	3.39724e-05	0.00604864
Heart	ENSSSAG00000041805	zgc:55558	33.793	-0.837488	0.329364	0.000417295	0.0235661
Heart	ENSSSAG00000005055	PTPRB	711.833	-0.836912	0.290406	0.000137441	0.0130364
Heart	ENSSSAG00000095383	tigara	187.873	-0.83395	0.251719	4.08428e-05	0.00664438
Heart	ENSSSAG00000007329	slc25a12	1363.98	-0.828599	0.226185	1.11295e-05	0.00315503
Heart	ENSSSAG00000044736	cpox	1083.55	-0.827475	0.286415	0.000138733	0.0130364
Heart	ENSSSAG00000007599	pcca	917.917	-0.826879	0.308143	0.00027249	0.018488
Heart	ENSSSAG00000060254		123.876	-0.826543	0.276151	0.000102926	0.0107948
Heart	ENSSSAG00000046597	flncb	5912.49	-0.335919	0.0916013	2.75276e-05	0.00540008	x
Heart	ENSSSAG00000085633		33.9992	-0.825388	0.406273	0.0012796	0.0448325
Heart	ENSSSAG00000071490	akap1b	791.955	-0.824662	0.270619	9.60828e-05	0.0105112
Heart	ENSSSAG00000064442	got2a	2625.96	-0.82256	0.226576	1.19293e-05	0.00331612
Heart	ENSSSAG00000069717	gfm2	495.767	-0.822363	0.217573	7.1101e-06	0.00242353
Heart	ENSSSAG00000116094		93.5186	-0.821588	0.22739	1.42756e-05	0.00371582
Heart	ENSSSAG00000081694	chchd4a	136.899	-0.819662	0.258137	6.49982e-05	0.00823464
Heart	ENSSSAG00000093886	mtfr1l	314.196	-0.818777	0.233615	1.93998e-05	0.00441446
Heart	ENSSSAG00000049688		750.996	-0.808653	0.227955	1.64288e-05	0.00402727
Heart	ENSSSAG00000063477	wars2	89.4231	-0.802608	0.143303	1.22814e-09	4.41504e-06
Heart	ENSSSAG00000065311		338.289	-0.79918	0.26921	0.000122187	0.012259
Heart	ENSSSAG00000098304		1450.41	-0.79476	0.252258	7.06882e-05	0.00861253
Heart	ENSSSAG00000071509	pkma	7238.74	-0.786481	0.368766	0.000920039	0.0365361
Heart	ENSSSAG00000119061		122.937	-0.784085	0.258288	0.000100368	0.0106906
Heart	ENSSSAG00000056533		9783.1	-0.782922	0.20287	5.41502e-06	0.00206892
Heart	ENSSSAG00000091762	CUX1	107.051	-0.782133	0.278133	0.000204038	0.0160937
Heart	ENSSSAG00000100405	mrps6	915.878	-0.780999	0.273965	0.000175785	0.0149469
Heart	ENSSSAG00000116316		72.4929	-0.778452	0.345208	0.000844333	0.0350973
Heart	ENSSSAG00000106909		531.707	-0.776331	0.138297	1.11165e-09	4.41504e-06
Heart	ENSSSAG00000055580		82.0712	-0.77589	0.243992	6.68354e-05	0.00836614
Heart	ENSSSAG00000111808		55.4667	-0.770099	0.268166	0.000173929	0.0149469
Heart	ENSSSAG00000040671	phb2b	2299.87	-0.768662	0.215663	1.64568e-05	0.00402727
Heart	ENSSSAG00000084590	tsfm	399.746	-0.76658	0.232854	4.24286e-05	0.0068248
Heart	ENSSSAG00000051692	tnni1c	45.8531	-0.765623	0.274846	0.000221644	0.0167886
Heart	ENSSSAG00000039337		576.418	-0.764143	0.174646	6.46712e-07	0.000533277
Heart	ENSSSAG00000009617		119.11	-0.763624	0.344985	0.000907926	0.0363577
Heart	ENSSSAG00000077290	cs	4161.73	-0.762768	0.292334	0.000359811	0.0219119
Heart	ENSSSAG00000003772		73.8052	-0.762526	0.187982	2.69988e-06	0.00117126
Heart	ENSSSAG00000042984		2033.12	-0.761093	0.321799	0.000609328	0.0289325
Heart	ENSSSAG00000066179	acot13	973.431	-0.757575	0.235149	5.52643e-05	0.00771867
Heart	ENSSSAG00000117867		241.833	-0.756824	0.214114	1.92829e-05	0.00441446
Heart	ENSSSAG00000062905		626.933	-0.749578	0.297666	0.000451584	0.0243958
Heart	ENSSSAG00000053732		394.805	-0.748527	0.392582	0.00149659	0.0492534
Heart	ENSSSAG00000049346		385.127	-0.747969	0.261607	0.000181065	0.0150657
Heart	ENSSSAG00000068177		1017.42	-0.747797	0.264518	0.000188461	0.0153621
Heart	ENSSSAG00000005536		3769.3	-0.74725	0.162813	2.32493e-07	0.000246546
Heart	ENSSSAG00000055890	timm44	405.928	-0.74175	0.17748	1.40821e-06	0.000857867
Heart	ENSSSAG00000081015		53.4571	-0.738286	0.286084	0.000397172	0.0228809
Heart	ENSSSAG00000063964		925.27	-0.738262	0.171712	9.18968e-07	0.000641753
Heart	ENSSSAG00000010173	aco2	9933.47	-0.737665	0.174187	1.61009e-06	0.000891637
Heart	ENSSSAG00000006683	kpyk	5897.7	-0.735034	0.209231	2.48539e-05	0.00508297
Heart	ENSSSAG00000072585	ACSF3	409.44	-0.734865	0.193559	7.50916e-06	0.00242521
Heart	ENSSSAG00000007675	raph1b	182.053	-0.732353	0.24938	0.000137421	0.0130364
Heart	ENSSSAG00000106508		237.207	-0.73198	0.196581	9.62906e-06	0.00287012
Heart	ENSSSAG00000108983	rgs12b	185.559	-0.72335	0.353882	0.00125614	0.0444571
Heart	ENSSSAG00000007650	prep	309.439	-0.720415	0.214903	3.96502e-05	0.00656223
Heart	ENSSSAG00000058859	ADAMTS15	384.18	-0.720116	0.306934	0.000659011	0.0301419
Heart	ENSSSAG00000039853	fitm2	215.948	-0.718973	0.327103	0.000906629	0.0363566
Heart	ENSSSAG00000039266	ATAD3A	454.229	-0.718364	0.221263	4.65375e-05	0.00689281
Heart	ENSSSAG00000109898	rad21a	1237.63	-0.717612	0.142927	2.73233e-08	4.60189e-05
Heart	ENSSSAG00000114064		397.46	-0.71477	0.331558	0.00101324	0.0393639
Heart	ENSSSAG00000108573	PPARGC1A	806.753	-0.712833	0.20617	2.62869e-05	0.0052267
Heart	ENSSSAG00000067160		12745.4	-0.707952	0.170496	1.61935e-06	0.000891637
Heart	ENSSSAG00000058620	cluha	834.773	-0.707099	0.207554	3.28912e-05	0.00604506
Heart	ENSSSAG00000081711		751.889	-0.703163	0.269774	0.0003855	0.022613
Heart	ENSSSAG00000041527	RM46	586.112	-0.701409	0.192752	1.37005e-05	0.00365131
Heart	ENSSSAG00000094472		49.9297	-0.700991	0.30003	0.000755231	0.0326221
Heart	ENSSSAG00000042515	TRAP1	889.571	-0.700135	0.245887	0.000192278	0.0154956
Heart	ENSSSAG00000043281	tpi1b	23243.3	-0.699718	0.134642	1.1712e-08	2.09586e-05
Heart	ENSSSAG00000073537		978.432	-0.698403	0.332183	0.00117212	0.0427248
Heart	ENSSSAG00000101348		178.117	-0.698141	0.204269	3.31949e-05	0.00604506
Heart	ENSSSAG00000111976		291.49	-0.693647	0.322043	0.00107442	0.0405306
Heart	ENSSSAG00000091910		36.9205	-0.689192	0.271342	0.000479574	0.0252792
Heart	ENSSSAG00000045777		6161.42	-0.684196	0.168417	2.60288e-06	0.00114655
Heart	ENSSSAG00000061401	c1qbp	1286.91	-0.683887	0.296551	0.000763866	0.0328393
Heart	ENSSSAG00000055881		908.588	-0.683842	0.171977	3.78981e-06	0.00155014
Heart	ENSSSAG00000107443		205.238	-0.679221	0.186733	1.36803e-05	0.00365131
Heart	ENSSSAG00000007190		232.107	-0.675049	0.156424	8.87607e-07	0.000635349
Heart	ENSSSAG00000052259		2547.14	-0.67344	0.216888	8.90167e-05	0.00991723
Heart	ENSSSAG00000046794		245.756	-0.672443	0.201151	4.26682e-05	0.006825
Heart	ENSSSAG00000109121	mrpl12	707.189	-0.667404	0.154592	8.83529e-07	0.000635349
Heart	ENSSSAG00000112929	pcca	1121.14	-0.666797	0.241073	0.000258492	0.0181656
Heart	ENSSSAG00000040214		9075.15	-0.666688	0.196581	3.42358e-05	0.00604864
Heart	ENSSSAG00000119392		3484.65	-0.662924	0.255833	0.000377791	0.0224417
Heart	ENSSSAG00000062498	mfsd2b	105.31	-0.662202	0.202853	5.32033e-05	0.00746724
Heart	ENSSSAG00000043370	PSME4	1137.26	-0.658791	0.137963	9.76811e-08	0.000128682
Heart	ENSSSAG00000080215	ecsit	315.164	-0.658751	0.207957	7.4787e-05	0.00892208
Heart	ENSSSAG00000073094		1481.44	-0.654938	0.167871	5.32459e-06	0.00206892
Heart	ENSSSAG00000074202		249.167	-0.654367	0.208168	8.65627e-05	0.00973939
Heart	ENSSSAG00000106231		597.333	-0.653774	0.188061	2.45965e-05	0.00506652
Heart	ENSSSAG00000071544	vars2	290.169	-0.653144	0.17107	7.39968e-06	0.00242521
Heart	ENSSSAG00000074349		4013.29	-0.652232	0.229562	0.000206021	0.0161696
Heart	ENSSSAG00000072497		41.4766	-0.651039	0.283082	0.000877266	0.0359855
Heart	ENSSSAG00000073320		230.083	-0.64957	0.195351	4.75926e-05	0.00689281
Heart	ENSSSAG00000052715	ABCD2	162.074	-0.647127	0.260367	0.000547286	0.0270969
Heart	ENSSSAG00000081436		813.112	-0.646552	0.190582	3.44473e-05	0.00604864
Heart	ENSSSAG00000003745	ndufs8a	2027.52	-0.644565	0.25207	0.000448984	0.0243011
Heart	ENSSSAG00000121096		274.444	-0.643465	0.219017	0.000160949	0.0142249
Heart	ENSSSAG00000076264	aacs	126.412	-0.64234	0.245689	0.000389003	0.022613
Heart	ENSSSAG00000106914	nsfl1c	506.833	-0.638193	0.141254	3.3901e-07	0.000334708
Heart	ENSSSAG00000068030	mettl8	220.766	-0.636339	0.204824	9.72717e-05	0.010572
Heart	ENSSSAG00000090988	TRAP1	757.69	-0.635791	0.174614	1.56393e-05	0.00392794
Heart	ENSSSAG00000049350		92.4884	-0.633406	0.228386	0.000259497	0.0181661
Heart	ENSSSAG00000089538	gpr37b	39.5489	-0.632225	0.27663	0.000890062	0.0361876
Heart	ENSSSAG00000039519	AATM	8530.57	-0.630411	0.241772	0.000403596	0.0231115
Heart	ENSSSAG00000064277	CHP1	250.298	-0.62969	0.183548	3.04051e-05	0.00579506
Heart	ENSSSAG00000009075		42.6131	-0.629324	0.21859	0.000203264	0.016077
Heart	ENSSSAG00000050237		391.126	-0.627409	0.187962	4.5019e-05	0.00688124
Heart	ENSSSAG00000048030		987.46	-0.627328	0.240792	0.000418518	0.0235886
Heart	ENSSSAG00000047621		93.6714	-0.626644	0.226717	0.000271937	0.018488
Heart	ENSSSAG00000064590	pparab	442.696	-0.625453	0.211398	0.000156491	0.0139584
Heart	ENSSSAG00000041806		203.757	-0.62537	0.233514	0.000351661	0.0218258
Heart	ENSSSAG00000120928	ndufs8a	5178.06	-0.624896	0.213275	0.000161547	0.0142249
Heart	ENSSSAG00000042438		175.95	-0.624629	0.300082	0.00144466	0.0482093
Heart	ENSSSAG00000068534		2826.54	-0.624506	0.162715	6.23683e-06	0.00223991
Heart	ENSSSAG00000094099		184.734	-0.623074	0.218465	0.000202124	0.0160664
Heart	ENSSSAG00000115945	ABCC1	125.931	-0.621502	0.229818	0.000324205	0.0208599
Heart	ENSSSAG00000047778	GRP75	3038.69	-0.621334	0.286936	0.0011791	0.0428427
Heart	ENSSSAG00000039406	ccnk	136.898	-0.621178	0.176982	2.51564e-05	0.00510836
Heart	ENSSSAG00000109220		146.256	-0.620035	0.209876	0.000165549	0.0144073
Heart	ENSSSAG00000038939	SRL	967.886	-0.619965	0.254689	0.000648667	0.0299559
Heart	ENSSSAG00000076968	samm50l	3687.13	-0.619941	0.219933	0.000235432	0.0173734
Heart	ENSSSAG00000080526		391.329	-0.619349	0.290501	0.00127857	0.0448325
Heart	ENSSSAG00000076316	slc43a1b	1433.53	-0.617173	0.28366	0.00120305	0.0432786
Heart	ENSSSAG00000063977	abhd18	2052.08	-0.616989	0.220297	0.000248984	0.0179569
Heart	ENSSSAG00000119387	vps37c	134.44	-0.615944	0.226767	0.000328606	0.0210956
Heart	ENSSSAG00000032973	pard6gb	43.7785	-0.615596	0.296761	0.00151364	0.0494167
Heart	ENSSSAG00000061136	pdhb	2921.21	-0.614342	0.282876	0.00112505	0.0419273
Heart	ENSSSAG00000010292	timm29	134.127	-0.612925	0.173742	2.2894e-05	0.00481986
Heart	ENSSSAG00000059838	oxct1a	3121.57	-0.61162	0.261886	0.00080031	0.0336964
Heart	ENSSSAG00000069915	cox10	769.854	-0.611525	0.218695	0.000246697	0.0179098
Heart	ENSSSAG00000024733	ADCY6	254.278	-0.609998	0.182625	4.57531e-05	0.00689281
Heart	ENSSSAG00000052180	lmo2	562.504	0.626897	0.150704	1.84824e-06	0.00096216	x
Heart	ENSSSAG00000009601		1215.64	-0.608734	0.219539	0.000276261	0.0186285
Heart	ENSSSAG00000066252		52.0495	-0.60453	0.188423	7.56304e-05	0.00894814
Heart	ENSSSAG00000096830	cdh11	121.225	-0.601437	0.241227	0.000556575	0.0271018
Heart	ENSSSAG00000009594	HACD3	146.77	-0.601187	0.254748	0.000802477	0.0336964
Heart	ENSSSAG00000049764		565.627	-0.598675	0.190414	9.13316e-05	0.0100577
Heart	ENSSSAG00000074712	si:ch211-215a10.4	755.583	-0.598252	0.209078	0.000223875	0.0169129
Heart	ENSSSAG00000076685		427.192	-0.597943	0.220118	0.000319481	0.0206022
Heart	ENSSSAG00000079179		4668.24	-0.597911	0.233862	0.000487767	0.0256252
Heart	ENSSSAG00000098886		326.097	-0.59776	0.244436	0.000646233	0.0298917
Heart	ENSSSAG00000072705	aifm1	6365.64	-0.597222	0.203039	0.000177117	0.0149747
Heart	ENSSSAG00000045586	ppox	385.75	-0.594269	0.236941	0.00054985	0.0270969
Heart	ENSSSAG00000100599	timm10	191.225	-0.593204	0.176688	4.50875e-05	0.00688124
Heart	ENSSSAG00000046565	MAST2	354.248	-0.592947	0.278808	0.00134826	0.0462314
Heart	ENSSSAG00000118725		56.4569	-0.591144	0.225723	0.000442352	0.0241707
Heart	ENSSSAG00000005870	slc30a9	455.621	-0.5911	0.223368	0.00037123	0.0222744
Heart	ENSSSAG00000074760	sec31a	658.748	-0.590635	0.174821	3.79913e-05	0.00636121
Heart	ENSSSAG00000071960	setd3	96.7274	-0.590495	0.160863	1.46466e-05	0.00377052
Heart	ENSSSAG00000094520	foxn3	125.951	-0.589806	0.19451	0.000129188	0.0126471
Heart	ENSSSAG00000040154	mylk4b	150.003	-0.847887	0.350507	0.000490197	0.0256685	x
Heart	ENSSSAG00000040541	hipk3a	589.327	-0.589193	0.186706	7.71762e-05	0.00905618
Heart	ENSSSAG00000053757	hspe1	321.875	-0.587025	0.198807	0.000165192	0.0144073
Heart	ENSSSAG00000063954	immt	9972.19	-0.586421	0.224634	0.000409587	0.0232224
Heart	ENSSSAG00000047960		4135.24	-0.586227	0.205572	0.000214324	0.0166105
Heart	ENSSSAG00000003591		2756	-0.585923	0.232448	0.000556305	0.0271018
Heart	ENSSSAG00000065319	pmpca	807.952	-0.585759	0.193821	0.000128471	0.0126471
Heart	ENSSSAG00000117042	s1pr2	293.895	-0.58429	0.256223	0.000991373	0.0386717
Heart	ENSSSAG00000079064		1708.72	-0.583956	0.230335	0.000504124	0.0260353
Heart	ENSSSAG00000051001	flad1	544.427	-0.58288	0.239267	0.000663781	0.030169
Heart	ENSSSAG00000095565	nmnat3	268.362	-0.580648	0.190288	0.000122881	0.012259
Heart	ENSSSAG00000072805	EPS15L1	73.975	-0.579627	0.223211	0.000471377	0.0251331
Heart	ENSSSAG00000105306	TIM8A	915.118	-0.578832	0.19657	0.000175183	0.0149469
Heart	ENSSSAG00000039167		889.692	-0.577813	0.172381	4.39702e-05	0.00688124
Heart	ENSSSAG00000004944	il11ra	239.452	-0.577101	0.152785	9.64966e-06	0.00287012
Heart	ENSSSAG00000043938	ap1b1	1194.39	-0.575452	0.119759	9.88757e-08	0.000128682
Heart	ENSSSAG00000045556	cpeb4a	142.549	-0.574948	0.202676	0.000233248	0.0173734
Heart	ENSSSAG00000095799	HACD3	182.305	-0.574284	0.215979	0.000396719	0.0228809
Heart	ENSSSAG00000079929	SUCLA2	10352.9	-0.573488	0.208054	0.000288858	0.0192339
Heart	ENSSSAG00000093297	dbpa	688.917	-0.572888	0.255743	0.00111106	0.0415841
Heart	ENSSSAG00000090549		586.907	-0.572062	0.225387	0.00047844	0.0252792
Heart	ENSSSAG00000000800		966.214	-0.571155	0.158669	1.84033e-05	0.00428392
Heart	ENSSSAG00000096175	acat2	252.752	-0.569603	0.232045	0.00063773	0.0295751
Heart	ENSSSAG00000098771		113.552	-0.56919	0.17592	6.94977e-05	0.00857697
Heart	ENSSSAG00000027167		173.99	-0.568013	0.18945	0.000142496	0.0132253
Heart	ENSSSAG00000009334		3088.84	-0.566106	0.230065	0.000621745	0.0293275
Heart	ENSSSAG00000009667		813.476	-0.565819	0.26899	0.00150425	0.0492879
Heart	ENSSSAG00000005924	oxa1l	975.769	-0.564096	0.172811	6.24662e-05	0.00811295
Heart	ENSSSAG00000001473	GOT1	7923.44	-0.563716	0.217026	0.000505697	0.0260353
Heart	ENSSSAG00000055241	foxo3b	294.859	-0.556818	0.145045	7.82597e-06	0.0024897
Heart	ENSSSAG00000088334		97.1553	-0.55031	0.213128	0.000510496	0.0260544
Heart	ENSSSAG00000039485		141.699	-0.547307	0.172126	8.40496e-05	0.00960358
Heart	ENSSSAG00000049398		4045.16	-0.547111	0.227248	0.000777288	0.0330158
Heart	ENSSSAG00000041331		308.449	-0.545343	0.15094	1.81864e-05	0.00426813
Heart	ENSSSAG00000000891	pdha1a	1486.82	-0.544903	0.157761	3.37572e-05	0.00604864
Heart	ENSSSAG00000042280		157.015	-0.543396	0.227686	0.000857197	0.0355699
Heart	ENSSSAG00000010830	COL26A1	47.3003	-0.543093	0.240858	0.0011606	0.0426029
Heart	ENSSSAG00000009382		175.883	-0.541644	0.250199	0.00139289	0.0471968
Heart	ENSSSAG00000006332		336.055	-0.541137	0.218294	0.000586921	0.0281958
Heart	ENSSSAG00000071572		187.66	-0.541107	0.227401	0.000866745	0.0358105
Heart	ENSSSAG00000072848		168.11	-0.541002	0.205333	0.000447309	0.0242563
Heart	ENSSSAG00000013940	acaca	219.012	-0.540945	0.216074	0.000628521	0.0293691
Heart	ENSSSAG00000044915	OPA1	304.326	-0.540879	0.219423	0.000682612	0.0306822
Heart	ENSSSAG00000081441	hspe1	1054.68	-0.539486	0.182533	0.000143394	0.0132253
Heart	ENSSSAG00000004305	gtpbp1l	164.611	-0.539365	0.207105	0.00050313	0.0260353
Heart	ENSSSAG00000010103	SOD1	2952.57	-0.538402	0.146651	1.5398e-05	0.00390155
Heart	ENSSSAG00000049415	srl	6733.57	-0.538031	0.238787	0.00108156	0.0407464
Heart	ENSSSAG00000088182	si:ch73-21k16.4	134.197	-0.537727	0.219344	0.000725801	0.0317229
Heart	ENSSSAG00000068907		267.486	-0.534586	0.198522	0.000387345	0.022613
Heart	ENSSSAG00000043221		344.162	-0.534376	0.12163	8.09693e-07	0.000610083
Heart	ENSSSAG00000056554		250.697	-0.53366	0.20145	0.000435895	0.0240011
Heart	ENSSSAG00000080982	pi4kaa	754.923	-0.533536	0.15081	2.7536e-05	0.00540008
Heart	ENSSSAG00000074353	ndufs6	1635.38	-0.533034	0.215191	0.000681659	0.0306822
Heart	ENSSSAG00000005666		313.547	-0.531888	0.240511	0.00117287	0.0427248
Heart	ENSSSAG00000071028		1643.47	-0.531574	0.231259	0.00103812	0.0397298
Heart	ENSSSAG00000008774	dhx35	268.667	-0.529007	0.147607	2.07894e-05	0.00461427
Heart	ENSSSAG00000072788	ppcs	211.877	-0.526555	0.17186	0.00013176	0.0127451
Heart	ENSSSAG00000029815		323.814	-0.524145	0.20472	0.000520751	0.026343
Heart	ENSSSAG00000110460		825.158	-0.523881	0.139197	1.1111e-05	0.00315503
Heart	ENSSSAG00000079033	mrps25	643.667	-0.523256	0.167187	0.000102259	0.0107642
Heart	ENSSSAG00000042572	FARS2	529.571	-0.521866	0.200585	0.000503278	0.0260353
Heart	ENSSSAG00000094035	ABCC1	305.245	-0.519407	0.136507	9.95573e-06	0.0029087
Heart	ENSSSAG00000112918	PITRM1	1801.45	-0.518385	0.131624	5.49817e-06	0.00207136
Heart	ENSSSAG00000045401		360.696	-0.516641	0.121931	1.58068e-06	0.000891637
Heart	ENSSSAG00000015358	cpeb3	505.233	-0.51653	0.192615	0.000412956	0.0233671
Heart	ENSSSAG00000097016	ITPR1	396.617	-0.514708	0.126064	3.40219e-06	0.00141176
Heart	ENSSSAG00000000916	jmjd6	477.734	-0.514706	0.240635	0.00151315	0.0494167
Heart	ENSSSAG00000002735	mrpl12	879.133	-0.512318	0.147322	3.30062e-05	0.00604506
Heart	ENSSSAG00000069481		638.054	-0.511517	0.157748	7.28077e-05	0.00874114
Heart	ENSSSAG00000076539		1356.02	-0.510551	0.20924	0.000769205	0.032931
Heart	ENSSSAG00000044994	iars1	697.529	-0.509979	0.17931	0.000258308	0.0181656
Heart	ENSSSAG00000052856		1405.47	-0.505275	0.208445	0.000749203	0.0324577
Heart	ENSSSAG00000083441	pdss1	1390.39	-0.504358	0.195537	0.000506484	0.0260353
Heart	ENSSSAG00000045173	ap1b1	601.961	-0.504108	0.120097	1.9709e-06	0.000978353
Heart	ENSSSAG00000054606	endog	231.218	-0.503731	0.154426	7.05918e-05	0.00861253
Heart	ENSSSAG00000078485	SAMC	664.704	-0.501992	0.199391	0.000653791	0.0300473
Heart	ENSSSAG00000041485		498.806	-0.501378	0.187044	0.000427132	0.0237251
Heart	ENSSSAG00000114705	CHP1	1080.23	-0.499633	0.199054	0.000716935	0.0316779
Heart	ENSSSAG00000085160		291.183	-0.499113	0.206582	0.000902123	0.0363285
Heart	ENSSSAG00000121563	sdhdb	2378.92	-0.499007	0.149664	6.15466e-05	0.00811295
Heart	ENSSSAG00000061679	HIPK3	929.147	-0.497167	0.166676	0.000178345	0.0149747
Heart	ENSSSAG00000004843	hipk3a	287.661	-0.495841	0.118735	2.44656e-06	0.0011119
Heart	ENSSSAG00000054959	ESYT2	145.932	-0.495687	0.206515	0.000901139	0.0363285
Heart	ENSSSAG00000100996	dbpa	467.403	-0.494927	0.199883	0.000749321	0.0324577
Heart	ENSSSAG00000035206		279.949	-0.494139	0.15996	0.000125853	0.0124686
Heart	ENSSSAG00000000193	tmem186	195.605	-0.490855	0.221855	0.0013479	0.0462314
Heart	ENSSSAG00000112860	pgm5	805.352	-0.490196	0.206739	0.00091049	0.0363586
Heart	ENSSSAG00000085165	ptgesl	865.845	-0.490049	0.176758	0.000337339	0.0214161
Heart	ENSSSAG00000050349	mief1	309.192	-0.488019	0.136008	2.22972e-05	0.00476428
Heart	ENSSSAG00000049601	ARHGAP35	3090.95	-0.487949	0.164001	0.00018886	0.0153621
Heart	ENSSSAG00000081674		3042.86	-0.487793	0.199472	0.000775575	0.032996
Heart	ENSSSAG00000116562	timm23a	1046.89	-0.48727	0.194855	0.000669393	0.030326
Heart	ENSSSAG00000050867		473.531	-0.487192	0.0899502	4.62828e-09	1.04137e-05
Heart	ENSSSAG00000108138		203.036	-0.485194	0.190299	0.000621366	0.0293275
Heart	ENSSSAG00000109443		128.038	-0.485126	0.194996	0.000726816	0.0317229
Heart	ENSSSAG00000073700	tmem126a	335.281	-0.484256	0.15525	0.00011728	0.01195
Heart	ENSSSAG00000010383	BTBD7	351.75	-0.483889	0.100642	1.20969e-07	0.000144316
Heart	ENSSSAG00000106548		247.497	-0.483766	0.176177	0.00036161	0.0219356
Heart	ENSSSAG00000074820	aurkaip1	710.19	-0.482892	0.107666	5.67072e-07	0.000523755
Heart	ENSSSAG00000004886	igf2bp1	156.259	-0.481859	0.198356	0.000802632	0.0336964
Heart	ENSSSAG00000117307	RT07	377.436	-0.480453	0.211993	0.0012481	0.0443368
Heart	ENSSSAG00000047895	samm50l	2412.83	-0.478669	0.179551	0.000480298	0.0252792
Heart	ENSSSAG00000009186	yars2	140.654	-0.477713	0.148151	8.78358e-05	0.00982389
Heart	ENSSSAG00000045678	mix23	201.399	-0.475674	0.183016	0.000569548	0.0276532
Heart	ENSSSAG00000073314		656.784	-0.475582	0.218598	0.0014698	0.0487791
Heart	ENSSSAG00000051950	c2cd5	80.6477	-0.474386	0.197748	0.000916941	0.0364637
Heart	ENSSSAG00000120132		498.997	-0.473782	0.151618	0.000121456	0.0122448
Heart	ENSSSAG00000075415	PPIF	1197.43	-0.472854	0.196379	0.000941241	0.0371719
Heart	ENSSSAG00000047920	mrpl37	1387.46	-0.470041	0.162122	0.000228709	0.0171874
Heart	ENSSSAG00000069298	NADK2	606.737	-0.468627	0.163431	0.00027019	0.0184796
Heart	ENSSSAG00000064656	nars2	361.336	-0.468439	0.170522	0.000381634	0.022613
Heart	ENSSSAG00000004360		623.881	-0.46571	0.18337	0.000678433	0.0306386
Heart	ENSSSAG00000093209		1180.19	-0.462573	0.165175	0.000344872	0.0217204
Heart	ENSSSAG00000048071	RNF144A	87.2378	-0.461361	0.193801	0.00101137	0.0393446
Heart	ENSSSAG00000093215	gopc	412.543	-0.458882	0.137748	6.19229e-05	0.00811295
Heart	ENSSSAG00000081401	slc15a4	156.332	-0.458654	0.187743	0.000880611	0.0360195
Heart	ENSSSAG00000073570	mtif2	558.226	-0.458223	0.148219	0.000138869	0.0130364
Heart	ENSSSAG00000082949		114.369	-0.456401	0.185263	0.000830139	0.0346986
Heart	ENSSSAG00000041616		210.851	-0.455763	0.14943	0.000161892	0.0142249
Heart	ENSSSAG00000090406	GSK3B	691.024	-0.454766	0.162533	0.000341631	0.0215929
Heart	ENSSSAG00000015794	mrpl4	907.711	-0.454694	0.143981	0.000112445	0.0115396
Heart	ENSSSAG00000086003	rhot1a	2221.28	-0.452702	0.196549	0.00124766	0.0443368
Heart	ENSSSAG00000054675	RT31	960.635	-0.451174	0.161691	0.000360454	0.0219119
Heart	ENSSSAG00000041502	nolc1	1067.52	-0.450379	0.173996	0.000612866	0.0290043
Heart	ENSSSAG00000042221	acox1	1151.38	-0.449542	0.145409	0.000144577	0.0132253
Heart	ENSSSAG00000112164	EIF4G1	1284.24	-0.44882	0.128333	3.55842e-05	0.00604864
Heart	ENSSSAG00000104856	EHBP1	954.365	-0.448502	0.145321	0.000145835	0.0132979
Heart	ENSSSAG00000063047		268.377	-0.447593	0.118179	1.2217e-05	0.00336344
Heart	ENSSSAG00000093826		742.34	-0.445992	0.168022	0.000517696	0.0262348
Heart	ENSSSAG00000048431	agtpbp1	226.454	-0.445191	0.14704	0.000177779	0.0149747
Heart	ENSSSAG00000079892		5581.64	-0.445011	0.186649	0.00104462	0.0397886
Heart	ENSSSAG00000100835	mrpl17	347.888	-0.444103	0.169218	0.000555237	0.0271018
Heart	ENSSSAG00000035325	ZNF516	183.292	-0.443913	0.190062	0.00119243	0.0431083
Heart	ENSSSAG00000075534		435.816	-0.442835	0.162067	0.000420711	0.0235931
Heart	ENSSSAG00000020503		252.67	-0.442755	0.11131	5.73843e-06	0.0021338
Heart	ENSSSAG00000041554	hmgb3b	339.506	-0.441965	0.186687	0.00119077	0.0431083
Heart	ENSSSAG00000081486	ndufa10	5968.26	-0.441904	0.185663	0.00141745	0.0478025
Heart	ENSSSAG00000048688		170.948	-0.441231	0.165667	0.00051644	0.0262176
Heart	ENSSSAG00000078738	dync1h1	6592.97	-0.438595	0.172572	0.000715532	0.0316779
Heart	ENSSSAG00000092912		875.472	-0.438549	0.174386	0.000780655	0.0330158
Heart	ENSSSAG00000062197	pgk	3153.41	-0.43763	0.188237	0.00129235	0.0451252
Heart	ENSSSAG00000051545		928.908	-0.437022	0.194877	0.00138789	0.0470847
Heart	ENSSSAG00000087587		121.569	-0.436102	0.160342	0.000458331	0.0246672
Heart	ENSSSAG00000056079	cenpq	817.233	-0.43479	0.171649	0.000735987	0.0320742
Heart	ENSSSAG00000119216		707.395	-0.433448	0.122373	3.56699e-05	0.00604864
Heart	ENSSSAG00000076540	usp5	862.894	-0.431883	0.175041	0.000887387	0.0361876
Heart	ENSSSAG00000052562	aars1	897.653	-0.431441	0.189211	0.00126294	0.0446012
Heart	ENSSSAG00000062986		151.42	-0.427741	0.183308	0.00127326	0.0448325
Heart	ENSSSAG00000056390	TMEM69	223.035	-0.427731	0.162451	0.000596746	0.028572
Heart	ENSSSAG00000030127	EPAS1	1260.99	-0.42711	0.165801	0.000694775	0.0310825
Heart	ENSSSAG00000063940	ptcd3	610.837	-0.427095	0.146017	0.000247079	0.0179098
Heart	ENSSSAG00000079517	kif1b	905.702	-0.426072	0.188358	0.00148188	0.0489725
Heart	ENSSSAG00000109221	ccng1	5235.06	-0.422007	0.153731	0.000438336	0.0240239
Heart	ENSSSAG00000045815	RT07	431.02	-0.418832	0.142458	0.000254683	0.0181395
Heart	ENSSSAG00000000898	fcho2	183.208	-0.418728	0.156178	0.000528366	0.0265349
Heart	ENSSSAG00000070946		1729.13	-0.417145	0.16335	0.000716337	0.0316779
Heart	ENSSSAG00000121618		252.937	-0.415816	0.168303	0.000953951	0.0375702
Heart	ENSSSAG00000091938		228.359	-0.414805	0.181844	0.00150041	0.0492657
Heart	ENSSSAG00000108879	psmd1	426.295	-0.414784	0.173942	0.00120368	0.0432786
Heart	ENSSSAG00000096623	psmd1	2329.28	-0.414452	0.157653	0.000630376	0.0293691
Heart	ENSSSAG00000065903	ube3c	181.964	-0.410904	0.157949	0.000680705	0.0306822
Heart	ENSSSAG00000005544	xpnpep1	290.312	-0.409329	0.111224	2.06957e-05	0.00461427
Heart	ENSSSAG00000042284	coq8b	238.625	-0.408375	0.167446	0.00104119	0.0397485
Heart	ENSSSAG00000009873	DGLUCY	584.083	-0.408281	0.11796	4.52186e-05	0.00688124
Heart	ENSSSAG00000073121	loxl2b	751.443	-0.406455	0.134034	0.000206129	0.0161696
Heart	ENSSSAG00000075872	dnajc11a	702.045	-0.406364	0.151212	0.000528753	0.0265349
Heart	ENSSSAG00000105744		1080.89	-0.406023	0.164681	0.000956877	0.0376337
Heart	ENSSSAG00000053878	tmem147	421.682	-0.405913	0.119487	5.88709e-05	0.00792786
Heart	ENSSSAG00000008200	RPS6KC1	314.13	-0.403349	0.157233	0.000784513	0.0331204
Heart	ENSSSAG00000071931	WEE1	180.217	-0.396932	0.144313	0.000478285	0.0252792
Heart	ENSSSAG00000074534		429.696	-0.396378	0.1538	0.000773042	0.0329769
Heart	ENSSSAG00000079537		381.322	-0.395636	0.129303	0.000187701	0.0153621
Heart	ENSSSAG00000006610	mrpl38	754.348	-0.39543	0.0900646	1.11864e-06	0.000727933
Heart	ENSSSAG00000069474	gatb	473.809	-0.39538	0.0869886	5.61772e-07	0.000523755
Heart	ENSSSAG00000100810	MTFMT	318.082	-0.39427	0.159172	0.00102555	0.0396268
Heart	ENSSSAG00000010221		708.431	-0.392544	0.137689	0.000366263	0.0220312
Heart	ENSSSAG00000067003	nploc4	359.887	-0.391373	0.142992	0.000494025	0.025718
Heart	ENSSSAG00000066027		359.045	-0.391088	0.163782	0.00127459	0.0448325
Heart	ENSSSAG00000071073	MED14	223.121	-0.390293	0.163892	0.00130017	0.045238
Heart	ENSSSAG00000041953	rnf19a	451.893	-0.389371	0.14885	0.000705306	0.0313576
Heart	ENSSSAG00000039991	MAST4	210.854	-0.385864	0.156232	0.00106487	0.0403298
Heart	ENSSSAG00000034608		267.623	-0.383408	0.154925	0.00103262	0.0396326
Heart	ENSSSAG00000058011	DMXL1	550.867	-0.382636	0.0895466	1.98186e-06	0.000978353
Heart	ENSSSAG00000007327	qrsl1	347.139	-0.38228	0.130891	0.000306035	0.019931
Heart	ENSSSAG00000062878	ell	429.287	-0.382068	0.157392	0.00120954	0.043398
Heart	ENSSSAG00000065945	ube2r2	195.941	-0.381712	0.156959	0.00119156	0.0431083
Heart	ENSSSAG00000001599	fus	433.396	-0.381506	0.161815	0.00142997	0.047951
Heart	ENSSSAG00000045549	pggt1b	507.169	-0.379867	0.117835	0.000109851	0.0113547
Heart	ENSSSAG00000006583		433.691	-0.378473	0.114304	8.67402e-05	0.00973939
Heart	ENSSSAG00000008849	ide	1404.24	-0.378355	0.154878	0.00113485	0.0419807
Heart	ENSSSAG00000084473		213.638	-0.370422	0.155599	0.00141527	0.0477854
Heart	ENSSSAG00000058131	PDK1	299.247	-0.369997	0.136764	0.000600961	0.0286779
Heart	ENSSSAG00000081066	gapvd1	533.957	-0.369713	0.126256	0.00030612	0.019931
Heart	ENSSSAG00000053115	tax1bp1a	322.088	-0.367788	0.136499	0.000630834	0.0293691
Heart	ENSSSAG00000113466		1710.1	-0.366968	0.101984	3.56285e-05	0.00604864
Heart	ENSSSAG00000071783	dnm1l	1092.71	-0.364625	0.143977	0.00102269	0.0395697
Heart	ENSSSAG00000063808	HELZ	565.469	-0.363896	0.147125	0.00113445	0.0419807
Heart	ENSSSAG00000068607		208.714	-0.36308	0.135575	0.000664724	0.030169
Heart	ENSSSAG00000092652		878.726	-0.361544	0.140185	0.000898569	0.0363034
Heart	ENSSSAG00000075700	prpf40a	720.17	-0.361447	0.109201	9.61837e-05	0.0105112
Heart	ENSSSAG00000111558	khsrp	691.891	-0.359706	0.101755	4.21953e-05	0.0068248
Heart	ENSSSAG00000042542	zfr	509.754	-0.358433	0.111856	0.000136124	0.0130351
Heart	ENSSSAG00000009267	RT35	942.019	-0.355917	0.134517	0.000759985	0.0327217
Heart	ENSSSAG00000054697	rnf220a	184.925	-0.354228	0.142686	0.00116671	0.0426912
Heart	ENSSSAG00000061085		290.563	-0.352131	0.109753	0.000141827	0.0132253
Heart	ENSSSAG00000090887		147.59	-0.351727	0.141157	0.00116972	0.0427187
Heart	ENSSSAG00000052772	p5cs	513.592	-0.351666	0.0969033	3.17078e-05	0.00593371
Heart	ENSSSAG00000007259	mtx2	2084.78	-0.349969	0.108038	0.000137996	0.0130364
Heart	ENSSSAG00000103129	pdlim7	2616.31	-0.589665	0.18451	7.65396e-05	0.00901844	x
Heart	ENSSSAG00000009664	mtpn	5431.09	-0.349669	0.115035	0.000252845	0.0180541
Heart	ENSSSAG00000052276	epb41l3b	4517.26	-0.349043	0.141412	0.00130032	0.045238
Heart	ENSSSAG00000004821	if4h	1510.57	-0.348801	0.130911	0.000744232	0.0323843
Heart	ENSSSAG00000006213		351.891	-0.348487	0.107983	0.000133816	0.0128576
Heart	ENSSSAG00000015804		330.463	-0.347344	0.14264	0.00137597	0.046845
Heart	ENSSSAG00000006782		517.57	-0.343644	0.128603	0.000724463	0.0317169
Heart	ENSSSAG00000067730	casd1	103.652	-0.343561	0.14151	0.00143357	0.047951
Heart	ENSSSAG00000069487	coq5	572.363	-0.342533	0.13517	0.00105926	0.0402772
Heart	ENSSSAG00000120388	ppp1r37	749.44	-0.342047	0.13904	0.00132518	0.0457765
Heart	ENSSSAG00000030622	mrps9	487.587	-0.3387	0.10528	0.000175925	0.0149469
Heart	ENSSSAG00000041743		344.429	-0.337441	0.134508	0.00119601	0.0431832
Heart	ENSSSAG00000078306	pfkpa	4424.96	-1.12155	0.300015	6.44867e-06	0.00225169	x
Heart	ENSSSAG00000045811	gars	1209.96	-0.335035	0.114776	0.000386015	0.022613
Heart	ENSSSAG00000101676		182.44	-0.330271	0.109824	0.000300904	0.0197151
Heart	ENSSSAG00000047894	EIF4G1	956.577	-0.328712	0.114706	0.000463727	0.0249108
Heart	ENSSSAG00000038552		614.747	-0.324989	0.117899	0.000654567	0.0300473
Heart	ENSSSAG00000084385	si:ch211-215a10.4	809.558	-0.324335	0.125792	0.00102997	0.0396326
Heart	ENSSSAG00000093389	smg1	652.544	-0.322702	0.083614	1.47492e-05	0.00377052
Heart	ENSSSAG00000063381		264.775	-0.322409	0.111086	0.000427569	0.0237251
Heart	ENSSSAG00000007630	efr3a	204.254	-0.320618	0.119604	0.000832802	0.0347592
Heart	ENSSSAG00000109815	uhmk1	261.558	-0.320454	0.123119	0.00103173	0.0396326
Heart	ENSSSAG00000070691		385.715	-0.31663	0.103088	0.00026611	0.0184274
Heart	ENSSSAG00000015746	eci1	2317.39	-0.315254	0.128226	0.00153321	0.0499419
Heart	ENSSSAG00000063552	dcj11	487.182	-0.31213	0.116145	0.000771469	0.0329682
Heart	ENSSSAG00000048873		350.16	-0.312075	0.121879	0.00120204	0.0432786
Heart	ENSSSAG00000074122	PNPT1	513.395	-0.31207	0.10186	0.000278582	0.0187239
Heart	ENSSSAG00000009786	ralgapa1	901.767	-0.312023	0.0984699	0.00022086	0.0167886
Heart	ENSSSAG00000073091	med16	342.977	-0.307124	0.111922	0.000748612	0.0324577
Heart	ENSSSAG00000074951		202.678	-0.300774	0.116643	0.00123683	0.0441557
Heart	ENSSSAG00000066854	HECTD1	2693.17	-0.298696	0.116476	0.00128084	0.0448325
Heart	ENSSSAG00000080138	GCN1	572.816	-0.295612	0.09348	0.000219741	0.0167886
Heart	ENSSSAG00000059225		1203.45	-0.293732	0.0993419	0.000421894	0.0235931
Heart	ENSSSAG00000052162	VPS13A	894.098	-0.286916	0.113347	0.00150781	0.049339
Heart	ENSSSAG00000063396	exoc3	514.017	-0.283047	0.109661	0.00122464	0.0438299
Heart	ENSSSAG00000064659	ANKHD1	686.846	-0.281496	0.0999471	0.000708635	0.0314568
Heart	ENSSSAG00000065320	ambra1b	530.18	-0.279682	0.0924405	0.000387287	0.022613
Heart	ENSSSAG00000100596	nbas	482.378	-0.274736	0.0844699	0.000186164	0.0153168
Heart	ENSSSAG00000067039	GLG1	1460.23	-0.269453	0.0822588	0.000213409	0.0166042
Heart	ENSSSAG00000068510	iars2	1175.12	-0.263259	0.0916476	0.000477397	0.0252792
Heart	ENSSSAG00000007720	pmpca	1202.25	-0.236238	0.0860553	0.0013171	0.0456
Heart	ENSSSAG00000015815		1232.49	-0.231942	0.0839531	0.00116488	0.0426912
Heart	ENSSSAG00000006992		913.92	-0.207353	1.05593	0.00134414	0.0462011
Heart	ENSSSAG00000008532		481.66	-0.11562	0.221546	0.000445306	0.0241975
Heart	ENSSSAG00000089671	nr4a3	301.611	-0.083622	0.173837	0.0012531	0.0444045
Heart	ENSSSAG00000068846		447.512	-0.0813798	0.172449	0.000392867	0.0227704
Heart	ENSSSAG00000118954		28.6777	-0.0537923	0.150057	3.72124e-10	2.66366e-06
Heart	ENSSSAG00000008433		79.4314	-0.0502055	0.146848	0.000898963	0.0363034
Heart	ENSSSAG00000112871		150.012	-0.0415484	0.142127	0.00036514	0.0220312
Heart	ENSSSAG00000097609		241.007	0.0165939	0.134264	9.84131e-05	0.0105931
Heart	ENSSSAG00000086272		252.754	0.0529208	0.147443	0.000906593	0.0363566
Heart	ENSSSAG00000088379		2932.33	0.174624	0.0599961	0.00130538	0.0453587
Heart	ENSSSAG00000005810		1017.14	0.223015	0.0778193	0.000989621	0.038656
Heart	ENSSSAG00000006569	ppm1g	1615.41	0.236063	0.0857817	0.00112566	0.0419273
Heart	ENSSSAG00000078911		662.669	0.239113	0.0818508	0.000720729	0.0317169
Heart	ENSSSAG00000114215		321.907	0.24854	0.0923098	0.0012805	0.0448325
Heart	ENSSSAG00000040371		992.935	0.251492	0.082272	0.000420011	0.0235931
Heart	ENSSSAG00000006909	cryzl1	388.964	0.253918	0.0967294	0.00147791	0.0489644
Heart	ENSSSAG00000093700		2462.69	0.254857	0.0971746	0.00142115	0.0478148
Heart	ENSSSAG00000108819	zgc:153990	234.079	0.257137	0.0983282	0.00149958	0.0492657
Heart	ENSSSAG00000076506	rps7	14726.1	0.257179	0.0922629	0.000844582	0.0350973
Heart	ENSSSAG00000063366	spout1	572.041	0.264469	0.0855757	0.000346683	0.0217204
Heart	ENSSSAG00000068519		256.48	0.268238	0.0909269	0.000540325	0.0269054
Heart	ENSSSAG00000059155	bmal2	349.137	0.270869	0.0934476	0.000609098	0.0289325
Heart	ENSSSAG00000107958	RS17	4669.77	0.271643	0.0951714	0.000683732	0.0306843
Heart	ENSSSAG00000068814	ddrgk1	731.567	0.27225	0.10631	0.00152312	0.0496697
Heart	ENSSSAG00000074636	wtap	1143.42	0.274046	0.0934692	0.000529519	0.0265349
Heart	ENSSSAG00000040847	cf166	843.35	0.277919	0.0787569	7.76608e-05	0.00907585
Heart	ENSSSAG00000098393	RNF26	203.458	0.279837	0.1073	0.00136489	0.0465233
Heart	ENSSSAG00000076675	nfil3	680.225	0.280237	0.100374	0.000779865	0.0330158
Heart	ENSSSAG00000052007	RPS3A	24857.8	0.280322	0.099575	0.000638356	0.0295751
Heart	ENSSSAG00000044191		7692.51	0.280417	0.0799205	7.28232e-05	0.00874114
Heart	ENSSSAG00000087271	rpl32	8218.95	0.280426	0.0916904	0.00034833	0.021776
Heart	ENSSSAG00000002926	EIF1B	5237.92	0.283846	0.104644	0.000932275	0.0369197
Heart	ENSSSAG00000063394	CYB5	718.563	0.287102	0.0900966	0.000215231	0.0166105
Heart	ENSSSAG00000053711	usf1	925.235	0.287266	0.0918463	0.000268821	0.0184578
Heart	ENSSSAG00000076350	CF064	190.93	0.287593	0.105396	0.000889842	0.0361876
Heart	ENSSSAG00000072689	vma21	375.591	0.291324	0.108442	0.000975972	0.0381749
Heart	ENSSSAG00000057006	rpl31	8581.22	0.292078	0.0774084	2.5677e-05	0.00517736
Heart	ENSSSAG00000073777		22156.5	0.292887	0.0997967	0.00050527	0.0260353
Heart	ENSSSAG00000054475	RPL7	25916.4	0.29326	0.114518	0.00135646	0.0463553
Heart	ENSSSAG00000078918	tbca	950.828	0.293529	0.090352	0.000174497	0.0149469
Heart	ENSSSAG00000091447	MLXIP	391.107	0.293544	0.10912	0.000927846	0.0367951
Heart	ENSSSAG00000069593	RPS3A	31346.8	0.293668	0.106637	0.000773977	0.0329769
Heart	ENSSSAG00000074553	rps24	13140.1	0.294604	0.10514	0.000723414	0.0317169
Heart	ENSSSAG00000069798		3260.01	0.295585	0.0978942	0.000358162	0.0219119
Heart	ENSSSAG00000040446		29473.1	0.295728	0.10229	0.000509958	0.0260544
Heart	ENSSSAG00000060203	rl21	8566	0.296496	0.0950187	0.000331734	0.0211674
Heart	ENSSSAG00000005944		15357.5	0.297961	0.100789	0.000443289	0.0241757
Heart	ENSSSAG00000105393		558.998	0.298137	0.10095	0.00046731	0.0250562
Heart	ENSSSAG00000071484	psd7	704.359	0.298702	0.0786432	2.16112e-05	0.00468766
Heart	ENSSSAG00000003176	rpl13a	15352.5	0.301458	0.0972061	0.000258747	0.0181656
Heart	ENSSSAG00000073977	pbx2	1017.76	0.302342	0.114646	0.00104502	0.0397886
Heart	ENSSSAG00000080109	bmi1a	537.395	0.302361	0.105596	0.000542678	0.0269756
Heart	ENSSSAG00000046230		1256.32	0.305121	0.084546	4.0303e-05	0.00662703
Heart	ENSSSAG00000005356	tssc4	655.975	0.305419	0.0978937	0.0002373	0.0173781
Heart	ENSSSAG00000071226	stx7	746.707	0.305826	0.120334	0.00129575	0.0451888
Heart	ENSSSAG00000113417	rxrbb	3401.12	0.308116	0.121336	0.00132936	0.0458175
Heart	ENSSSAG00000054381	CTDS2	1161.23	0.308932	0.124495	0.00147026	0.0487791
Heart	ENSSSAG00000008886	CHMP5	1620.13	0.310168	0.108424	0.000570245	0.0276532
Heart	ENSSSAG00000077613	zgc:92907	806.983	0.310195	0.0930047	0.000129864	0.0126471
Heart	ENSSSAG00000075809		263.515	0.310441	0.108409	0.000510097	0.0260544
Heart	ENSSSAG00000110093	TMM93	271.608	0.310675	0.120635	0.00124367	0.0442893
Heart	ENSSSAG00000069505		7033.97	0.310912	0.095051	0.000192694	0.0154956
Heart	ENSSSAG00000078619		9343.28	0.311278	0.100253	0.000234744	0.0173734
Heart	ENSSSAG00000069098	steep1	418.698	0.314497	0.088204	4.76661e-05	0.00689281
Heart	ENSSSAG00000006967	mat2b	957.655	0.315734	0.122291	0.00111401	0.04164
Heart	ENSSSAG00000047832	ERH	1464.75	0.316037	0.100695	0.000209525	0.0163464
Heart	ENSSSAG00000046726	rpl19	2114.01	0.317342	0.0956891	0.000146798	0.0133433
Heart	ENSSSAG00000049829		6457.41	0.318049	0.106901	0.00044538	0.0241975
Heart	ENSSSAG00000080211	fis1	1222.6	0.318274	0.0618761	4.37596e-08	6.9607e-05
Heart	ENSSSAG00000062741	rps14	19557.4	0.31903	0.111782	0.000548782	0.0270969
Heart	ENSSSAG00000066776	rpl12	24368.9	0.321508	0.13591	0.00149471	0.049248
Heart	ENSSSAG00000120241	si:ch211-212o1.2	842.317	0.321809	0.127649	0.00126746	0.0446919
Heart	ENSSSAG00000067618	riok2	445.383	0.321836	0.112815	0.000492283	0.025674
Heart	ENSSSAG00000051507	ube2g2	1566.74	0.322071	0.131275	0.00148762	0.0490709
Heart	ENSSSAG00000044819	BCAS2	633.268	0.322481	0.085017	2.02879e-05	0.00457388
Heart	ENSSSAG00000074237	napaa	344.066	0.323369	0.103895	0.000220902	0.0167886
Heart	ENSSSAG00000075524	rsrc2	1306.66	0.323729	0.111027	0.000421514	0.0235931
Heart	ENSSSAG00000063012	cssa01h9orf78	879.613	0.324259	0.0924218	5.6382e-05	0.00779869
Heart	ENSSSAG00000103201		383.909	0.325382	0.129059	0.00129169	0.0451252
Heart	ENSSSAG00000019789	rbm12bb	704.269	0.325757	0.116509	0.000582922	0.0280529
Heart	ENSSSAG00000015474	zgc:172121	162.917	0.326011	0.127594	0.0011502	0.0423842
Heart	ENSSSAG00000049726		790.223	0.328225	0.094109	5.92541e-05	0.00792786
Heart	ENSSSAG00000049830	nop56	1746.33	0.328391	0.108603	0.00028533	0.0190878
Heart	ENSSSAG00000065470	mgat2	1237.87	0.329415	0.0962848	7.54394e-05	0.00894814
Heart	ENSSSAG00000074172	rps10	14917.6	0.329658	0.10695	0.00023483	0.0173734
Heart	ENSSSAG00000059032	wdr3	961.986	0.330382	0.11287	0.000385052	0.022613
Heart	ENSSSAG00000067926	rpl19	16169.8	0.330858	0.0954316	6.21114e-05	0.00811295
Heart	ENSSSAG00000059327	SYAP1	1415.93	0.330902	0.116877	0.000513974	0.0261387
Heart	ENSSSAG00000024307		12915.2	0.331471	0.134831	0.00142444	0.0478691
Heart	ENSSSAG00000050408	UBC9	912.94	0.331897	0.113438	0.000383366	0.022613
Heart	ENSSSAG00000071672		572.243	0.335861	0.138295	0.00146213	0.0486222
Heart	ENSSSAG00000005282	gbrap	3721.21	0.336499	0.122921	0.000660338	0.030145
Heart	ENSSSAG00000044010	rpl7	17838.2	0.339609	0.119375	0.000470572	0.0251331
Heart	ENSSSAG00000058155	mrgbp	272.846	0.339737	0.138542	0.00135672	0.0463553
Heart	ENSSSAG00000071185		3877.81	0.340497	0.117269	0.000374204	0.0223213
Heart	ENSSSAG00000002161	UBC9	757.161	0.341406	0.108258	0.000181533	0.0150657
Heart	ENSSSAG00000098459	rpl31	12236.3	0.341455	0.11199	0.000250047	0.0179883
Heart	ENSSSAG00000026076		10094.8	0.341876	0.130164	0.000868521	0.0358321
Heart	ENSSSAG00000121028	tm2d1	290.021	0.34263	0.0855528	7.50387e-06	0.00242521
Heart	ENSSSAG00000044188	rl19	18326.3	0.343829	0.102404	9.08886e-05	0.0100476
Heart	ENSSSAG00000059489		387.679	0.343894	0.117457	0.000358801	0.0219119
Heart	ENSSSAG00000078329		21480.1	0.344474	0.112449	0.000256776	0.0181656
Heart	ENSSSAG00000073900	fa44b	322.556	0.344629	0.124352	0.000570797	0.0276532
Heart	ENSSSAG00000055845		483.734	0.34522	0.110447	0.000191588	0.0154956
Heart	ENSSSAG00000009468	rpl21	11035.1	0.346288	0.104104	0.000103502	0.0108156
Heart	ENSSSAG00000121227		3760.54	0.346498	0.119809	0.000398748	0.0229256
Heart	ENSSSAG00000107892	stx17	311.979	0.346849	0.118342	0.000352177	0.0218258
Heart	ENSSSAG00000068214	slc7a6os	460.395	0.347124	0.126979	0.000630602	0.0293691
Heart	ENSSSAG00000078018	RPS25	15682.7	0.34735	0.122728	0.000456144	0.0245957
Heart	ENSSSAG00000056402		5879.05	0.34798	0.0787972	1.53422e-06	0.000891637
Heart	ENSSSAG00000042831		4971.79	0.34846	0.113339	0.000276513	0.0186285
Heart	ENSSSAG00000068438	fam50a	1455.08	0.348574	0.120644	0.000389362	0.022613
Heart	ENSSSAG00000117529		154.704	0.349096	0.129526	0.00068913	0.0308782
Heart	ENSSSAG00000066482	nmd3	622.424	0.350227	0.129637	0.000674464	0.0305075
Heart	ENSSSAG00000120375	ugt5e1	423.471	0.350796	0.124855	0.000490385	0.0256685
Heart	ENSSSAG00000001858		494.378	0.352029	0.130374	0.000698106	0.0311828
Heart	ENSSSAG00000107070		139.395	0.352257	0.141119	0.00116748	0.0426912
Heart	ENSSSAG00000076707	rl26	14392.6	0.352505	0.101759	5.63129e-05	0.00779869
Heart	ENSSSAG00000084613		3791.6	0.353043	0.111276	0.00016246	0.0142249
Heart	ENSSSAG00000007090	rps23	21048.8	0.356507	0.118188	0.000237125	0.0173781
Heart	ENSSSAG00000018086	RPL10A	9386.99	0.356533	0.13036	0.000634615	0.0294972
Heart	ENSSSAG00000040727		586.9	0.35687	0.112449	0.000180035	0.0150285
Heart	ENSSSAG00000054237		997.363	0.357575	0.11467	0.000183855	0.0152143
Heart	ENSSSAG00000100553		644.562	0.358386	0.109039	0.000110406	0.011371
Heart	ENSSSAG00000091396		379.268	0.358697	0.105403	6.91044e-05	0.00856535
Heart	ENSSSAG00000090486	tmem187	257.621	0.361176	0.121656	0.000293352	0.0194086
Heart	ENSSSAG00000087718		174.625	0.36125	0.140015	0.000891041	0.0361876
Heart	ENSSSAG00000109892		8010.49	0.361332	0.136555	0.000664874	0.030169
Heart	ENSSSAG00000066243		462.696	0.361976	0.114761	0.000161992	0.0142249
Heart	ENSSSAG00000072230	rab25b	641.957	0.362203	0.141385	0.00095206	0.0375473
Heart	ENSSSAG00000064317		13922.3	0.362992	0.105143	5.69104e-05	0.00783184
Heart	ENSSSAG00000073699	CREBZF	660.322	0.363369	0.145758	0.0011102	0.0415841
Heart	ENSSSAG00000042048		10176.5	0.363618	0.0942891	1.37728e-05	0.00365131
Heart	ENSSSAG00000052210	dap	1182.63	0.365507	0.112316	0.000119119	0.0120827
Heart	ENSSSAG00000043543	blvrb	1172.12	0.365903	0.147414	0.00113137	0.0419602
Heart	ENSSSAG00000107409	ttyh2	299.465	0.366518	0.10271	3.75154e-05	0.00631848
Heart	ENSSSAG00000004822	SRSF6	2231.86	0.366929	0.097658	1.80024e-05	0.00425987
Heart	ENSSSAG00000065991		8684.52	0.367291	0.143856	0.000909424	0.0363586
Heart	ENSSSAG00000040208	HMGB1	1308.39	0.36764	0.083054	1.0398e-06	0.000708849
Heart	ENSSSAG00000005588	RASSF9	485.103	0.367683	0.125876	0.000335376	0.0213389
Heart	ENSSSAG00000007166	polr2c	533.411	0.370243	0.155416	0.00141992	0.0478148
Heart	ENSSSAG00000010052		601.646	0.371139	0.146773	0.0010226	0.0395697
Heart	ENSSSAG00000072739	fam32a	1713.73	0.371464	0.108236	5.97971e-05	0.0079633
Heart	ENSSSAG00000066053	rpl30	17446.6	0.371909	0.118041	0.000168451	0.0146154
Heart	ENSSSAG00000114797		659.255	0.372914	0.13884	0.000628354	0.0293691
Heart	ENSSSAG00000077452	calcoco1a	1174.64	0.373582	0.157278	0.00141264	0.0477529
Heart	ENSSSAG00000078447	afg2b	412.411	0.373615	0.138833	0.000611264	0.0289764
Heart	ENSSSAG00000081071		122.294	0.373671	0.145243	0.00087218	0.0358797
Heart	ENSSSAG00000091496	SAP18	737.641	0.377962	0.1295	0.000308961	0.0200593
Heart	ENSSSAG00000096751		170.953	0.378211	0.140766	0.00059961	0.0286612
Heart	ENSSSAG00000079593	atg13	1826.87	0.380701	0.124015	0.00019308	0.0154956
Heart	ENSSSAG00000121467		192.318	0.382077	0.127721	0.000248742	0.0179569
Heart	ENSSSAG00000109988	CREG1	492.536	0.382375	0.103497	1.94266e-05	0.00441446
Heart	ENSSSAG00000071741	st3gal3b	260.461	0.382463	0.158555	0.00126333	0.0446012
Heart	ENSSSAG00000086410	socs6b	230.485	0.38267	0.127404	0.000240903	0.0175958
Heart	ENSSSAG00000103389	rps10	6047.42	0.382863	0.121365	0.000149474	0.0135435
Heart	ENSSSAG00000073793	rcc2	1461.62	0.383408	0.126611	0.000231977	0.0173734
Heart	ENSSSAG00000072870	ddx49	720.555	0.383498	0.139699	0.000508248	0.0260544
Heart	ENSSSAG00000116373		429.811	0.38374	0.163835	0.00150453	0.0492879
Heart	ENSSSAG00000106064	baxa	683.952	0.384006	0.156445	0.00115359	0.0424544
Heart	ENSSSAG00000001506		15646.1	0.384339	0.10392	2.11499e-05	0.00462263
Heart	ENSSSAG00000110535		329.448	0.386583	0.137796	0.000424474	0.023645
Heart	ENSSSAG00000003544	mcrip1	425.155	0.387356	0.155942	0.00103013	0.0396326
Heart	ENSSSAG00000121578	arfrp1	595.685	0.387669	0.101948	1.40493e-05	0.00369046
Heart	ENSSSAG00000002569	brms1la	258.075	0.389454	0.144437	0.000575566	0.0278372
Heart	ENSSSAG00000047398		817.57	0.390155	0.153071	0.000904503	0.0363566
Heart	ENSSSAG00000040392	rnf113a	479.662	0.39084	0.167694	0.00143868	0.0480656
Heart	ENSSSAG00000056485	rps21	444.373	0.393477	0.132685	0.000252854	0.0180541
Heart	ENSSSAG00000000689		9478.08	0.394797	0.0930376	2.34974e-06	0.00108512
Heart	ENSSSAG00000007306		284.814	0.396242	0.146318	0.000549848	0.0270969
Heart	ENSSSAG00000002540	pgam5	576.155	0.396635	0.153083	0.000755395	0.0326221
Heart	ENSSSAG00000075399	RPL35	7163.14	0.397049	0.11646	5.92097e-05	0.00792786
Heart	ENSSSAG00000070973	RL7A	27297.4	0.397136	0.120881	8.48598e-05	0.00960358
Heart	ENSSSAG00000098616	DHRS13	261.38	0.397152	0.119677	8.13272e-05	0.00942737
Heart	ENSSSAG00000084477	cript	471.872	0.397246	0.143532	0.000474477	0.0252513
Heart	ENSSSAG00000120943		338.469	0.397764	0.15242	0.000700938	0.0312119
Heart	ENSSSAG00000119076		233.659	0.402761	0.170908	0.00132978	0.0458175
Heart	ENSSSAG00000078635		1185.26	0.403239	0.167521	0.00135643	0.0463553
Heart	ENSSSAG00000003697	rpl38	723.316	0.403618	0.149652	0.000531032	0.0265349
Heart	ENSSSAG00000045463	rpl26	9098.32	0.403955	0.102474	7.53856e-06	0.00242521
Heart	ENSSSAG00000080101	commd3	621.813	0.404571	0.136234	0.000247019	0.0179098
Heart	ENSSSAG00000052014		363.041	0.405115	0.175134	0.00144763	0.0482325
Heart	ENSSSAG00000067401		326.34	0.405404	0.168359	0.00115716	0.0425311
Heart	ENSSSAG00000071363	imp4	229.254	0.405944	0.136546	0.000237317	0.0173781
Heart	ENSSSAG00000003047		240.796	0.406408	0.130402	0.000157012	0.0139614
Heart	ENSSSAG00000078353	YY1	597.512	0.406423	0.14226	0.000345826	0.0217204
Heart	ENSSSAG00000081587	ID1	634.478	0.407796	0.161942	0.000897589	0.0363034
Heart	ENSSSAG00000061383	rpain	295.558	0.409963	0.146519	0.0004088	0.0232224
Heart	ENSSSAG00000048037	tbl1x	598.077	0.412095	0.134954	0.000185624	0.0153164
Heart	ENSSSAG00000066189		205.988	0.41496	0.131227	0.000129459	0.0126471
Heart	ENSSSAG00000116903		377.665	0.418706	0.0950551	1.09341e-06	0.000727933
Heart	ENSSSAG00000045122	brox	1247.86	0.420888	0.124055	5.71687e-05	0.00783184
Heart	ENSSSAG00000102224	zgc:63882	158.124	0.421303	0.139233	0.000194157	0.0154956
Heart	ENSSSAG00000077735	uba52	928.475	0.422199	0.13244	0.000116921	0.01195
Heart	ENSSSAG00000002767	btbd2a	698.369	0.425192	0.137048	0.000153888	0.0137709
Heart	ENSSSAG00000064642		5036.13	0.42813	0.100343	1.70534e-06	0.00092127
Heart	ENSSSAG00000100053	pnrc2	1579.11	0.42834	0.167035	0.000723514	0.0317169
Heart	ENSSSAG00000064168	gtpbp4	5135.22	0.429115	0.125821	6.41356e-05	0.00822279
Heart	ENSSSAG00000073512		1005.18	0.429336	0.117501	2.26667e-05	0.00480735
Heart	ENSSSAG00000047422	RL29	7143.47	0.429629	0.105908	3.89192e-06	0.00156949
Heart	ENSSSAG00000086169		75.4275	0.43038	0.160362	0.000523744	0.0264477
Heart	ENSSSAG00000073619	bloc1s1	594.894	0.430437	0.108931	6.74772e-06	0.00232772
Heart	ENSSSAG00000058582	cluap1	202.774	0.431175	0.111679	9.72345e-06	0.00287012
Heart	ENSSSAG00000006778	llph	727.938	0.431433	0.114338	1.37518e-05	0.00365131
Heart	ENSSSAG00000100294		12083.9	0.43272	0.100555	1.48577e-06	0.000886263
Heart	ENSSSAG00000085740	naa30	200.906	0.433939	0.186337	0.00125246	0.0444045
Heart	ENSSSAG00000015741	nelfa	297.806	0.434518	0.176398	0.000912749	0.0363981
Heart	ENSSSAG00000051691	spast	117.078	0.436038	0.182359	0.00107078	0.0404468
Heart	ENSSSAG00000001972	anp32b	1457.29	0.436215	0.133311	8.37634e-05	0.00960358
Heart	ENSSSAG00000113092		215.174	0.436591	0.147787	0.000227711	0.0171574
Heart	ENSSSAG00000104937	dio1	206.926	0.438076	0.182429	0.00103931	0.0397298
Heart	ENSSSAG00000078190	nmd3	1022.05	0.438411	0.114696	1.07692e-05	0.00311459
Heart	ENSSSAG00000075653	psmd9	1380.86	0.441154	0.156323	0.000339139	0.0214828
Heart	ENSSSAG00000085915		111.117	0.441188	0.192298	0.0013254	0.0457765
Heart	ENSSSAG00000058071	PDCL3	4331.52	0.443347	0.179951	0.000914558	0.0364195
Heart	ENSSSAG00000112478		94.9636	0.44633	0.136466	8.16986e-05	0.00943223
Heart	ENSSSAG00000059346		993.998	0.447074	0.163861	0.000403369	0.0231115
Heart	ENSSSAG00000085375		512.181	0.448974	0.130959	4.66033e-05	0.00689281
Heart	ENSSSAG00000002154	rpl39	4531.78	0.448983	0.135486	7.00255e-05	0.00860503
Heart	ENSSSAG00000107288		1821.48	0.449287	0.148745	0.000178898	0.0149773
Heart	ENSSSAG00000040776	dnajc12	260.849	0.451098	0.193933	0.00124078	0.0442417
Heart	ENSSSAG00000046105		143.032	0.451771	0.18393	0.000880438	0.0360195
Heart	ENSSSAG00000101552		470.234	0.453325	0.174676	0.00057734	0.0278759
Heart	ENSSSAG00000078630	ctdsp2	2048.66	0.453536	0.157141	0.000266067	0.0184274
Heart	ENSSSAG00000000128		863.797	0.455795	0.102181	6.69543e-07	0.000533277
Heart	ENSSSAG00000003089	kbrs2	423.653	0.456543	0.138106	7.27259e-05	0.00874114
Heart	ENSSSAG00000071455		3631.26	0.457163	0.207354	0.00147926	0.0489644
Heart	ENSSSAG00000076360	zbtb14	129.294	0.459698	0.148822	0.000142195	0.0132253
Heart	ENSSSAG00000068500		128.669	0.462422	0.185364	0.000785441	0.0331204
Heart	ENSSSAG00000113097		103.174	0.463895	0.181038	0.000624955	0.0293691
Heart	ENSSSAG00000082362	anp32b	1681.19	0.464488	0.135476	4.49104e-05	0.00688124
Heart	ENSSSAG00000106015	RAB27A	1789.56	0.46661	0.132304	3.29603e-05	0.00604506
Heart	ENSSSAG00000007291	tri13	248.101	0.467888	0.182534	0.000629289	0.0293691
Heart	ENSSSAG00000112300		140.758	0.468601	0.159228	0.000214854	0.0166105
Heart	ENSSSAG00000099847		132.712	0.469599	0.195786	0.000969096	0.0379578
Heart	ENSSSAG00000085926		978.511	0.470801	0.213184	0.00148293	0.0489725
Heart	ENSSSAG00000080913	GBRAP	3605.75	0.470804	0.171594	0.000387051	0.022613
Heart	ENSSSAG00000081348	cog4	2059.28	0.472173	0.167087	0.000265978	0.0184274
Heart	ENSSSAG00000043031	cers5	165.068	0.476671	0.161295	0.000207834	0.0162587
Heart	ENSSSAG00000066193		427.282	0.47682	0.132693	2.41397e-05	0.00504503
Heart	ENSSSAG00000049260	trappc13	437.143	0.478456	0.177342	0.000432003	0.0239248
Heart	ENSSSAG00000106004		197.824	0.479971	0.147501	7.80748e-05	0.00908714
Heart	ENSSSAG00000009744	meaf6	630.719	0.480204	0.152774	0.000125667	0.0124686
Heart	ENSSSAG00000122032		854.469	0.48041	0.156944	0.00013777	0.0130364
Heart	ENSSSAG00000114554	sap18	1173.71	0.480426	0.168005	0.000274828	0.0186025
Heart	ENSSSAG00000082318	S10I	7739.07	0.483617	0.171394	0.000294948	0.0194584
Heart	ENSSSAG00000092554		292.309	0.486096	0.186744	0.000530983	0.0265349
Heart	ENSSSAG00000065014		11482.7	0.490503	0.143002	3.07645e-05	0.00579506
Heart	ENSSSAG00000095716	ppp1r3da	302.973	0.49214	0.149635	6.57816e-05	0.00829717
Heart	ENSSSAG00000090761		128.498	0.493303	0.177547	0.000329966	0.0211355
Heart	ENSSSAG00000082680	chrac1	157.136	0.494132	0.172985	0.000271076	0.0184796
Heart	ENSSSAG00000105647		248.068	0.495901	0.202033	0.000778439	0.0330158
Heart	ENSSSAG00000070305	hmgb1b	800.811	0.499951	0.107089	2.30657e-07	0.000246546
Heart	ENSSSAG00000063495	BMAL1	359.85	0.500957	0.218071	0.0011457	0.0422728
Heart	ENSSSAG00000054460		199.637	0.503192	0.202784	0.000699337	0.0311891
Heart	ENSSSAG00000077887	rab11bb	322.881	0.503454	0.20228	0.00072417	0.0317169
Heart	ENSSSAG00000039966	hsf2	548.202	0.50375	0.0956997	1.03435e-08	1.97437e-05
Heart	ENSSSAG00000119148		254.567	0.504522	0.216203	0.00102887	0.0396326
Heart	ENSSSAG00000106354		567.301	0.505932	0.174736	0.000221088	0.0167886
Heart	ENSSSAG00000094623	GNA14	589.321	0.506095	0.151311	5.8189e-05	0.00792786
Heart	ENSSSAG00000086947		191.869	0.507897	0.210056	0.00081809	0.0342951
Heart	ENSSSAG00000121853		156.679	0.508365	0.222162	0.00109768	0.041245
Heart	ENSSSAG00000006134		2531.66	0.508793	0.0895593	8.50193e-10	4.41504e-06
Heart	ENSSSAG00000007060	TFAP4	193.072	0.511192	0.198027	0.000555127	0.0271018
Heart	ENSSSAG00000081501		915.738	0.511972	0.161646	0.000100439	0.0106906
Heart	ENSSSAG00000099348		101.388	0.514957	0.22263	0.00106156	0.0403111
Heart	ENSSSAG00000093600	ZFP36L2	3421.19	0.516349	0.220219	0.000934124	0.0369418
Heart	ENSSSAG00000090880		106.152	0.517135	0.163288	9.83983e-05	0.0105931
Heart	ENSSSAG00000088515		254.415	0.524662	0.12705	2.57459e-06	0.00114655
Heart	ENSSSAG00000109092		202.536	0.526511	0.240581	0.00138248	0.0470109
Heart	ENSSSAG00000048571	INIP	294.942	0.52735	0.156701	4.87681e-05	0.00694691
Heart	ENSSSAG00000087989		172.693	0.52941	0.151356	2.96786e-05	0.00571506
Heart	ENSSSAG00000007965		7094.69	0.529696	0.0968531	3.60288e-09	9.58421e-06
Heart	ENSSSAG00000079401	PDCL3	836.873	0.531052	0.161312	6.26209e-05	0.00811295
Heart	ENSSSAG00000120264		186.487	0.533352	0.196497	0.000358518	0.0219119
Heart	ENSSSAG00000015607	bccip	5665.72	0.539312	0.160934	4.73856e-05	0.00689281
Heart	ENSSSAG00000097114		265.289	0.539926	0.226685	0.000826068	0.0345789
Heart	ENSSSAG00000106218	nkain1	294.928	0.542039	0.153334	2.60308e-05	0.00521198
Heart	ENSSSAG00000003430		65.4904	0.542104	0.251521	0.00143144	0.047951
Heart	ENSSSAG00000072859	mepcea	281.176	0.542262	0.13902	6.37085e-06	0.00225169
Heart	ENSSSAG00000066581	clec3ba	123.836	0.544178	0.214546	0.000582966	0.0280529
Heart	ENSSSAG00000005083		101.275	0.54535	0.240586	0.00108683	0.0408911
Heart	ENSSSAG00000116401		154.992	0.549099	0.19761	0.000293515	0.0194086
Heart	ENSSSAG00000090296		360.56	0.550722	0.145114	9.33398e-06	0.00284309
Heart	ENSSSAG00000098610		385.084	0.556852	0.259509	0.00135916	0.046383
Heart	ENSSSAG00000063913	DDX21	2919.22	0.557701	0.214622	0.000479898	0.0252792
Heart	ENSSSAG00000007260		204.01	0.559215	0.214627	0.000469217	0.0251114
Heart	ENSSSAG00000044727		679.208	0.56066	0.20792	0.00031163	0.0201869
Heart	ENSSSAG00000054037	dhx16	148.324	0.560916	0.269278	0.00144873	0.0482325
Heart	ENSSSAG00000091541		84.9624	0.564724	0.23753	0.000836785	0.0348745
Heart	ENSSSAG00000057845		160.182	0.565269	0.166928	4.38979e-05	0.00688124
Heart	ENSSSAG00000118777		212.791	0.565482	0.245136	0.000963899	0.0378222
Heart	ENSSSAG00000057017		1792.93	0.56746	0.210319	0.000354933	0.0219119
Heart	ENSSSAG00000081969		391.953	0.568097	0.267409	0.00143231	0.047951
Heart	ENSSSAG00000004144	EZH1	1267.23	0.571939	0.226054	0.000555806	0.0271018
Heart	ENSSSAG00000001043	rnf113a	382.983	0.574783	0.151968	9.25238e-06	0.00284309
Heart	ENSSSAG00000111233		755.177	0.577952	0.218422	0.000404712	0.0231291
Heart	ENSSSAG00000092613		283.561	0.583766	0.228016	0.000495981	0.025773
Heart	ENSSSAG00000061233	ubald1b	533.246	0.583792	0.221042	0.000424139	0.023645
Heart	ENSSSAG00000064315	znhit3	427.365	0.583962	0.236261	0.000627379	0.0293691
Heart	ENSSSAG00000097365	spink2.5	334.73	0.587271	0.210322	0.000270575	0.0184796
Heart	ENSSSAG00000078509	LRR1	307.132	0.590433	0.20354	0.000194291	0.0154956
Heart	ENSSSAG00000117434		273.996	0.597568	0.24771	0.000723811	0.0317169
Heart	ENSSSAG00000053610		367.393	0.599244	0.275796	0.00121203	0.0434328
Heart	ENSSSAG00000070043	eapp	171.901	0.599525	0.258568	0.00089447	0.0362754
Heart	ENSSSAG00000054375	pno1	1938.75	0.599731	0.165796	1.7214e-05	0.00410726
Heart	ENSSSAG00000121039	mkrn1	348.506	0.600181	0.200808	0.000133821	0.0128576
Heart	ENSSSAG00000118778	sntb1	98.8124	0.680443	0.159919	1.32358e-06	0.000823843	x
Heart	ENSSSAG00000094999		416.269	0.613164	0.156755	5.41942e-06	0.00206892
Heart	ENSSSAG00000004807		83.2682	0.615134	0.220664	0.000265673	0.0184274
Heart	ENSSSAG00000043325		52.3534	0.617672	0.225015	0.000298554	0.019651
Heart	ENSSSAG00000015544		1374.22	0.62218	0.195262	7.29649e-05	0.00874114
Heart	ENSSSAG00000084311		226.835	0.624084	0.173569	1.67441e-05	0.00406286
Heart	ENSSSAG00000040482	TFAP4	169.677	0.62481	0.160775	5.97277e-06	0.00219246
Heart	ENSSSAG00000041016	zgc:112271	319.011	0.625698	0.248676	0.000526155	0.0265226
Heart	ENSSSAG00000065815		1443.57	0.62585	0.216351	0.00020257	0.0160664
Heart	ENSSSAG00000068990	unc45a	1000.5	-0.609935	0.178708	3.5702e-05	0.00604864	x
Heart	ENSSSAG00000121834	cry3b	765.582	0.628976	0.190624	5.19423e-05	0.00736243
Heart	ENSSSAG00000041995		230.916	0.630182	0.166396	8.36733e-06	0.00263267
Heart	ENSSSAG00000001780	ypel3	1163.04	0.631494	0.245678	0.000438827	0.0240239
Heart	ENSSSAG00000106362		176518	0.634737	0.236808	0.000349861	0.021824
Heart	ENSSSAG00000071862	RS27	911.41	0.634999	0.152667	1.82377e-06	0.00096216
Heart	ENSSSAG00000002268	ptk2ab	777.06	0.640537	0.218845	0.000177873	0.0149747
Heart	ENSSSAG00000047059	oaz2a	6527.72	0.644594	0.220355	0.000144355	0.0132253
Heart	ENSSSAG00000113626		96.6851	0.646581	0.259292	0.00051341	0.0261387
Heart	ENSSSAG00000059009	bccip	1285.89	0.656247	0.159073	2.03197e-06	0.000986092
Heart	ENSSSAG00000066519	cssa24h9orf116	47.6166	0.659217	0.31001	0.00118949	0.0431083
Heart	ENSSSAG00000006676		102.911	0.661807	0.238814	0.000258857	0.0181656
Heart	ENSSSAG00000002415		55.1975	0.66684	0.250774	0.000350823	0.0218258
Heart	ENSSSAG00000086408		38.6048	0.676594	0.262559	0.000434203	0.0239994
Heart	ENSSSAG00000085920		98.7329	0.679612	0.305076	0.000964313	0.0378222
Heart	ENSSSAG00000058337	vcl	7428.48	-0.34993	0.140862	0.00110423	0.0414367	x
Heart	ENSSSAG00000057674	t53i2	1064.91	0.695609	0.213233	5.25872e-05	0.00741713
Heart	ENSSSAG00000104588	pik3ip1	3646.5	0.70331	0.260007	0.000285077	0.0190878
Heart	ENSSSAG00000104670		168.28	0.703411	0.347098	0.0013436	0.0462011
Heart	ENSSSAG00000001458		147.501	0.707774	0.213545	4.54231e-05	0.00688124
Heart	ENSSSAG00000059242		1073.29	0.709799	0.209317	3.54669e-05	0.00604864
Heart	ENSSSAG00000047444		1127.56	0.711279	0.290231	0.000555813	0.0271018
Heart	ENSSSAG00000005332		175.48	0.716372	0.261409	0.000267359	0.0184274
Heart	ENSSSAG00000087608	tmem88a	93.0864	0.723656	0.28873	0.000491762	0.025674
Heart	ENSSSAG00000111101	cssa01h5orf63	231.475	0.729622	0.184359	4.02052e-06	0.00159883
Heart	ENSSSAG00000075495		132.329	0.73142	0.314306	0.000759347	0.0327217
Heart	ENSSSAG00000105934	CXorf65	57.3292	0.734431	0.323518	0.00087718	0.0359855
Heart	ENSSSAG00000068636		319.74	0.738704	0.258725	0.000187911	0.0153621
Heart	ENSSSAG00000068011	tmsb1	199.804	0.740863	0.327742	0.000870668	0.035869
Heart	ENSSSAG00000080743		151.169	0.743362	0.287749	0.000376972	0.0224396
Heart	ENSSSAG00000043685		40.3886	0.743681	0.304893	0.000554716	0.0271018
Heart	ENSSSAG00000068953	STMN1	202.22	0.748976	0.222799	3.51741e-05	0.00604864
Heart	ENSSSAG00000121949		62.0819	0.749251	0.354386	0.00112897	0.0419602
Heart	ENSSSAG00000108051		219.601	0.75486	0.350998	0.0010377	0.0397298
Heart	ENSSSAG00000099913	wu:fc63a07	60.63	0.757833	0.247785	0.000102091	0.0107642
Heart	ENSSSAG00000070163		536.714	0.761905	0.329554	0.000766545	0.0329051
Heart	ENSSSAG00000119750		78.398	0.763621	0.380836	0.00140927	0.0476954
Heart	ENSSSAG00000090248	c209e	3543.78	0.77387	0.196568	3.37151e-06	0.00141176
Heart	ENSSSAG00000117813		99.1539	0.776611	0.366425	0.00113098	0.0419602
Heart	ENSSSAG00000020818	iqcg	49.386	0.784719	0.219643	1.71389e-05	0.00410726
Heart	ENSSSAG00000115529		31.098	0.796996	0.311304	0.000406806	0.0231707
Heart	ENSSSAG00000090937		890.355	0.801519	0.307292	0.000359881	0.0219119
Heart	ENSSSAG00000115374		91.2768	0.807398	0.253544	6.47671e-05	0.00823464
Heart	ENSSSAG00000112338		500.052	0.81302	0.275713	0.000131747	0.0127451
Heart	ENSSSAG00000099472		28.4729	0.825201	0.422961	0.00138794	0.0470847
Heart	ENSSSAG00000024837	SYTL5	92.6679	0.82717	0.322206	0.000366147	0.0220312
Heart	ENSSSAG00000116917		270.287	0.82939	0.37373	0.000862177	0.0356891
Heart	ENSSSAG00000116233		319.94	0.84999	0.421844	0.00117902	0.0428427
Heart	ENSSSAG00000089014	TMEM255A	74.9995	0.857341	0.422322	0.00131035	0.0454764
Heart	ENSSSAG00000000255	bnip3	2106.29	0.871687	0.301301	0.000153907	0.0137709
Heart	ENSSSAG00000120857		56.0844	0.874052	0.434084	0.00131597	0.0456
Heart	ENSSSAG00000086795	fbxo32	1567.96	0.876144	0.337751	0.000355927	0.0219119
Heart	ENSSSAG00000084079		42.7071	0.890547	0.344634	0.00037373	0.0223213
Heart	ENSSSAG00000094600		64.4159	0.897374	0.275533	4.67671e-05	0.00689281
Heart	ENSSSAG00000077528	grk5	125.788	0.897417	0.206016	6.70507e-07	0.000533277
Heart	ENSSSAG00000095460		161.265	0.897781	0.309599	0.000143976	0.0132253
Heart	ENSSSAG00000002780		41.3253	0.902234	0.362282	0.000407057	0.0231707
Heart	ENSSSAG00000103079		44.1862	0.909768	0.361646	0.000437068	0.0240195
Heart	ENSSSAG00000077865	and3	127.998	0.92402	0.325741	0.00017146	0.0148058
Heart	ENSSSAG00000062787	zgc:162608	216.946	0.957133	0.332048	0.000152559	0.0137709
Heart	ENSSSAG00000117122	rab6ba	247.759	0.960923	0.375684	0.000346523	0.0217204
Heart	ENSSSAG00000035938		219.907	0.988916	0.426455	0.000661186	0.030145
Heart	ENSSSAG00000088475		73.9566	1.07468	0.256175	1.25383e-06	0.000797772
Heart	ENSSSAG00000080424		69.3312	1.08479	0.398187	0.000232632	0.0173734
Heart	ENSSSAG00000093789		251.37	1.08995	0.170163	9.02994e-12	2.58545e-07
Heart	ENSSSAG00000008321	ptn	240.875	1.1005	0.242085	2.60679e-07	0.000266563
Heart	ENSSSAG00000067109		96.4457	1.11561	0.420165	0.000267736	0.0184274
Heart	ENSSSAG00000109848		1502.98	1.15148	0.344131	2.21156e-05	0.00476101
Heart	ENSSSAG00000087388		86.6351	1.18662	0.587769	0.000996577	0.0388218
Heart	ENSSSAG00000111726		198.134	1.19156	0.630612	0.00114081	0.0421468
Heart	ENSSSAG00000085342		31.1416	1.19218	0.574702	0.00101598	0.0394165
Heart	ENSSSAG00000081940		61.4985	1.19676	0.415967	0.000143017	0.0132253
Heart	ENSSSAG00000053914		291.603	1.1978	0.473626	0.000306288	0.019931
Heart	ENSSSAG00000077051		147.353	1.19831	0.4329	0.00015313	0.0137709
Heart	ENSSSAG00000099524	nfil3-5	862.813	1.24008	0.380001	2.45833e-05	0.00506652
Heart	ENSSSAG00000076994	TNNT2	374.399	1.25064	0.534736	0.000544234	0.0270061
Heart	ENSSSAG00000064919	gamt	1518.9	1.25951	0.236709	4.7282e-09	1.04137e-05
Heart	ENSSSAG00000113917		119.52	1.27978	0.499338	0.000299934	0.0196966
Heart	ENSSSAG00000115603	tnni1b	36492.9	1.48669	0.452616	3.33584e-05	0.00604506
Heart	ENSSSAG00000065996		1163.4	1.49057	0.344926	6.65368e-07	0.000533277
Heart	ENSSSAG00000059739	cpvl	85.8874	1.51443	1.0812	0.000883527	0.0360872
Heart	ENSSSAG00000085870		281.02	1.70697	0.892052	0.0012047	0.0432786
Heart	ENSSSAG00000073472		101.221	1.74586	0.832345	0.000655895	0.0300473
Heart	ENSSSAG00000101893		106.275	1.78797	1.38357	0.000292584	0.0194086
Heart	ENSSSAG00000096137		134.669	2.18952	0.586743	7.589e-07	0.000587265
Heart	ENSSSAG00000108147		58.529	7.57704	1.26725	2.72291e-11	2.59875e-07
Heart	ENSSSAG00000059264		64.7817	7.82316	1.41152	2.48257e-11	2.59875e-07
Stomach	ENSSSAG00000099623	fkbp5	410.643	-2.98731	1.03128	6.8768e-06	0.0377479
Stomach	ENSSSAG00000108594		144.76	-2.43561	0.657003	2.78362e-06	0.0204457
Stomach	ENSSSAG00000099243		25.7149	-4.80026e-06	0.0014427	9.86425e-06	0.0464113
Stomach	ENSSSAG00000092238		12.0898	-4.29182e-06	0.0014427	3.10395e-06	0.0204457
Stomach	ENSSSAG00000111990		47.1672	-2.88824e-06	0.0014427	8.11242e-07	0.0133591
Stomach	ENSSSAG00000098868		15.8858	2.638	0.664157	3.02068e-06	0.0204457
Stomach	ENSSSAG00000085870		169.245	4.15198	0.872845	1.08285e-08	0.000356637

## Sheet: Supporting Info 2 - DTE
muscle	gene_id	transcript_id	gene_name	log2FoldChange	lfcSE	pvalue	padj	muscle_gene
Adductor mandibulae	ENSSSAG00000061830	ENSSSAT00000101274	heg1	-10.8021	3.07484	4.96e-18	9.42e-14
Adductor mandibulae	ENSSSAG00000019408	ENSSSAT00000047597		-6.72136	2.82757	1.36e-05	0.0202316
Adductor mandibulae	ENSSSAG00000112871	ENSSSAT00000222986		-4.35618	0.633023	2.56e-13	1.12e-09
Adductor mandibulae	ENSSSAG00000075548	ENSSSAT00000138489	KNTC1	-2.0033	0.413866	4.96e-08	0.000148776
Adductor mandibulae	ENSSSAG00000008911	ENSSSAT00000019947		-1.62839	0.442574	5.5e-06	0.0098038
Adductor mandibulae	ENSSSAG00000083363	ENSSSAT00000250365		-1.32236	0.290759	2.35e-07	0.000609742
Adductor mandibulae	ENSSSAG00000044071	ENSSSAT00000069371		-1.1687	0.332286	1.36e-05	0.0202316
Adductor mandibulae	ENSSSAG00000067743	ENSSSAT00000116634	HOOK2	-1.13748	0.308674	8.21e-06	0.0141851
Adductor mandibulae	ENSSSAG00000069346	ENSSSAT00000207747	SCARA5	-0.992965	0.258454	4.9e-06	0.00901601
Adductor mandibulae	ENSSSAG00000116408	ENSSSAT00000222250		-0.758702	0.23909	5.01e-05	0.0481836
Adductor mandibulae	ENSSSAG00000065362	ENSSSAT00000126577		-0.71515	0.20007	1.42e-05	0.0202316
Adductor mandibulae	ENSSSAG00000087005	ENSSSAT00000015704	dera	-0.63227	0.143514	4.35e-07	0.00103442
Adductor mandibulae	ENSSSAG00000081458	ENSSSAT00000223904	med15	-0.0164548	0.0607493	9.63e-10	3.43e-06
Heart	ENSSSAG00000007690	ENSSSAT00000016974	ACTA1	-1.2439	0.614821	0.000631982	0.0315294	x
Adductor mandibulae	ENSSSAG00000090080	ENSSSAT00000185793		-0.0126156	0.0592638	1.35e-14	7.02e-11
Adductor mandibulae	ENSSSAG00000079013	ENSSSAT00000221010	COL21A1	-0.0124931	0.0592202	1.74e-12	7.11e-09
Adductor mandibulae	ENSSSAG00000112053	ENSSSAT00000165339		-0.0124369	0.0591469	1.42e-05	0.0202316
Adductor mandibulae	ENSSSAG00000087367	ENSSSAT00000191139		-0.0120529	0.0590228	4.06e-05	0.045411
Adductor mandibulae	ENSSSAG00000041592	ENSSSAT00000059805		-0.0118203	0.0589492	5.15e-05	0.0481836
Adductor mandibulae	ENSSSAG00000085905	ENSSSAT00000228874		-0.00989529	0.0584103	3.7e-05	0.0422499
Adductor mandibulae	ENSSSAG00000040278	ENSSSAT00000092251	PPP3CA	-0.00972922	0.0583841	6.26e-07	0.00142782
Adductor mandibulae	ENSSSAG00000008285	ENSSSAT00000018455		-0.00743487	0.0578725	2.1e-06	0.00444483
Adductor mandibulae	ENSSSAG00000015905	ENSSSAT00000035700	slc38a2	-0.0065739	0.0577098	2.76e-05	0.034788
Adductor mandibulae	ENSSSAG00000075814	ENSSSAT00000139159	mtmr7a	-0.00546426	0.0575404	1.54e-05	0.0209644
Adductor mandibulae	ENSSSAG00000105947	ENSSSAT00000215338		-0.00544329	0.0575364	1.5e-05	0.0208383
Adductor mandibulae	ENSSSAG00000076429	ENSSSAT00000140513	grnb	-0.00487372	0.0574631	1.01e-07	0.000287681
Adductor mandibulae	ENSSSAG00000065998	ENSSSAT00000112892	sema3bl	-0.00486863	0.0574627	4.36e-08	0.00013827
Adductor mandibulae	ENSSSAG00000067803	ENSSSAT00000210450	IPPK	-0.00485534	0.0574575	4.95e-05	0.0481836
Heart	ENSSSAG00000062181	ENSSSAT00000101851	ACTA1	-0.886617	0.370833	0.000489677	0.0267125	x
Adductor mandibulae	ENSSSAG00000015764	ENSSSAT00000064526	dennd5b	-0.00466313	0.0574361	1.09e-06	0.00238683
Adductor mandibulae	ENSSSAG00000052041	ENSSSAT00000087945	p4ha1b	-0.00430774	0.0573706	5.26e-05	0.048344
Adductor mandibulae	ENSSSAG00000099825	ENSSSAT00000235926		-0.00427648	0.0573894	3.65e-05	0.0422499
Adductor mandibulae	ENSSSAG00000045603	ENSSSAT00000068999		-0.00423278	0.0573845	5.06e-05	0.0481836
Adductor mandibulae	ENSSSAG00000049587	ENSSSAT00000247291	ZEB1	-0.00408486	0.0573697	9.93e-06	0.016651
Adductor mandibulae	ENSSSAG00000061679	ENSSSAT00000102902	HIPK3	-0.00398714	0.0573587	2.87e-05	0.034788
Adductor mandibulae	ENSSSAG00000078929	ENSSSAT00000170534		-0.00363289	0.0573251	9.3e-09	3.12e-05
Adductor mandibulae	ENSSSAG00000069327	ENSSSAT00000121302	slc7a3a	-0.00172298	0.0571909	2.73e-05	0.034788
Adductor mandibulae	ENSSSAG00000109411	ENSSSAT00000200181		-0.00167193	0.0571886	4.23e-05	0.0459489
Adductor mandibulae	ENSSSAG00000071292	ENSSSAT00000243893	rpsa	-0.00156883	0.0571842	6.48e-23	1.85e-18
Adductor mandibulae	ENSSSAG00000070635	ENSSSAT00000139705	col2a1a	-0.00113604	0.0571688	5.47e-15	3.12e-11
Adductor mandibulae	ENSSSAG00000094510	ENSSSAT00000234762		-0.00113078	0.0571687	2.04e-17	2.9e-13
Adductor mandibulae	ENSSSAG00000063921	ENSSSAT00000120565	DENND5A	-0.00113004	0.0571687	2.49e-16	2.63e-12
Adductor mandibulae	ENSSSAG00000080203	ENSSSAT00000113060	calr	-0.00112993	0.0571687	1.17e-15	8.35e-12
Adductor mandibulae	ENSSSAG00000041751	ENSSSAT00000062784	cct7	-0.00112596	0.0571686	3.44e-16	2.81e-12
Adductor mandibulae	ENSSSAG00000090116	ENSSSAT00000238580		0.00110626	0.0571678	4.39e-14	2.09e-10
Adductor mandibulae	ENSSSAG00000082120	ENSSSAT00000126553	aldh1l1	0.00117495	0.0571698	1.87e-15	1.19e-11
Adductor mandibulae	ENSSSAG00000110237	ENSSSAT00000191827	ABCB1	0.00117725	0.0571699	2.77e-16	2.63e-12
Adductor mandibulae	ENSSSAG00000064228	ENSSSAT00000106344	CLIC4	0.00160688	0.0571856	5.13e-05	0.0481836
Adductor mandibulae	ENSSSAG00000094146	ENSSSAT00000163651	ptdss1a	0.00172035	0.0571906	5.13e-05	0.0481836
Adductor mandibulae	ENSSSAG00000058221	ENSSSAT00000103513	ACVR2A	0.00451772	0.0574177	1.09e-05	0.0177527
Adductor mandibulae	ENSSSAG00000077632	ENSSSAT00000144203	rpl8	0.403078	0.109857	1.12e-05	0.0178228
Adductor mandibulae	ENSSSAG00000009857	ENSSSAT00000021840	rl23	0.527071	0.150304	1.62e-05	0.0215534
Adductor mandibulae	ENSSSAG00000006614	ENSSSAT00000057422		0.710954	0.185564	4.75e-06	0.00901601
Adductor mandibulae	ENSSSAG00000083938	ENSSSAT00000169578		1.11712	0.354152	4.68e-05	0.0481836
Adductor mandibulae	ENSSSAG00000005415	ENSSSAT00000011622		1.22466	0.264421	1.4e-07	0.000379615
Adductor mandibulae	ENSSSAG00000099524	ENSSSAT00000207988	nfil3-5	1.37758	0.426407	4.27e-05	0.0459489
Adductor mandibulae	ENSSSAG00000093098	ENSSSAT00000170180		1.80635	0.581887	4.59e-05	0.0481836
Adductor mandibulae	ENSSSAG00000046337	ENSSSAT00000200237	LYPA3	3.77381	0.976545	3.88e-06	0.00762261
Adductor mandibulae	ENSSSAG00000090442	ENSSSAT00000162222		3.79582	1.13554	3.38e-05	0.0402117
Adductor mandibulae	ENSSSAG00000075649	ENSSSAT00000248500		7.79407	2.64587	3.09e-10	1.17e-06
Heart	ENSSSAG00000062181	ENSSSAT00000101884	ACTA1	-0.846756	0.351973	0.00057407	0.0296616	x
Adductor mandibulae	ENSSSAG00000040919	ENSSSAT00000237572		12.0115	3.04507	1.37e-24	7.82e-20
Filet	ENSSSAG00000067818	ENSSSAT00000210330	CC2D2A	-10.3344	3.03255	4.95e-16	2.94e-12
Filet	ENSSSAG00000107414	ENSSSAT00000122704		-0.826611	0.23669	1.7e-05	0.0281227
Filet	ENSSSAG00000119701	ENSSSAT00000254400	xpo7	-0.600535	0.166561	1.13e-05	0.0192145
Filet	ENSSSAG00000073539	ENSSSAT00000132242	CERK	-0.0121665	0.030774	7.74e-18	2.81e-13
Filet	ENSSSAG00000054100	ENSSSAT00000086252	fibpa	-0.00301222	0.0265532	2.52e-08	0.0001
Filet	ENSSSAG00000096517	ENSSSAT00000203603	noxo1a	-0.00185578	0.0263939	2.64e-05	0.0412292
Filet	ENSSSAG00000075472	ENSSSAT00000139497	gga3a	-0.00108309	0.0263312	1.47e-07	0.000436905
Filet	ENSSSAG00000041826	ENSSSAT00000060447		-0.00107804	0.0263308	7.68e-08	0.000240412
Filet	ENSSSAG00000043436	ENSSSAT00000202822		-0.00107083	0.0263304	4.85e-07	0.00131071
Filet	ENSSSAG00000079102	ENSSSAT00000117317	hectd2	-0.000955119	0.0263237	7.53e-06	0.0139854
Filet	ENSSSAG00000058619	ENSSSAT00000096033	fgd6	-0.000899047	0.0263208	9.65e-07	0.00249555
Filet	ENSSSAG00000076200	ENSSSAT00000214083	SCAMP1	-0.000849186	0.0263163	2.89e-05	0.0441236
Filet	ENSSSAG00000063167	ENSSSAT00000103623	nae1	-0.00084492	0.0263182	2.95e-08	0.000109499
Filet	ENSSSAG00000002293	ENSSSAT00000004964		-0.00023934	0.0262995	1.57e-16	1.34e-12
Filet	ENSSSAG00000038579	ENSSSAT00000059557		-0.000239047	0.0262995	3.55e-17	7.04e-13
Filet	ENSSSAG00000070523	ENSSSAT00000130710	hyou1	-0.000239002	0.0262995	3.19e-16	2.15e-12
Filet	ENSSSAG00000046709	ENSSSAT00000077277		-0.000238927	0.0262995	3.25e-16	2.15e-12
Filet	ENSSSAG00000043688	ENSSSAT00000065320	tkt	-0.000238804	0.0262995	9.66e-17	9.57e-13
Filet	ENSSSAG00000063416	ENSSSAT00000104249	eral1	-0.000238671	0.0262995	2.43e-15	1.11e-11
Filet	ENSSSAG00000104370	ENSSSAT00000184974		-0.000238615	0.0262995	5.64e-17	7.72e-13
Filet	ENSSSAG00000065253	ENSSSAT00000118203	aldh4a1	0.000247766	0.0262996	2.36e-15	1.11e-11
Filet	ENSSSAG00000058382	ENSSSAT00000095559	mapk15	0.000250619	0.0262997	6.49e-17	7.72e-13
Filet	ENSSSAG00000065457	ENSSSAT00000109762	PHKB	0.000251645	0.0262997	9.46e-18	2.81e-13
Filet	ENSSSAG00000039557	ENSSSAT00000062423	hspa4b	0.000276099	0.0263	1.14e-15	6.16e-12
Filet	ENSSSAG00000093538	ENSSSAT00000169377	letm1	0.000868819	0.0263192	1.07e-05	0.018703
Filet	ENSSSAG00000120674	ENSSSAT00000180434		2.3483	0.678921	2.17e-05	0.0348581
Filet	ENSSSAG00000059264	ENSSSAT00000097263		2.54975	0.665213	2.71e-06	0.0057548
Filet	ENSSSAG00000001874	ENSSSAT00000184502		3.55975	0.97103	1.05e-05	0.018703
Filet	ENSSSAG00000121544	ENSSSAT00000241982	ncoa2	4.63464	1.22612	4.48e-06	0.0088745
Filet	ENSSSAG00000004487	ENSSSAT00000009612		6.50378	1.83956	2.11e-06	0.00523874
Filet	ENSSSAG00000072617	ENSSSAT00000238053	sf3b5	7.95145	2.80795	6.17e-08	0.000203742
Filet	ENSSSAG00000087277	ENSSSAT00000236678	phf2	8.48809	3.15627	6.18e-06	0.0118444
Filet	ENSSSAG00000045432	ENSSSAT00000073394		8.6972	3.17662	2.64e-06	0.0057548
Filet	ENSSSAG00000072765	ENSSSAT00000129916		9.16215	3.31982	4.17e-06	0.00854667
Filet	ENSSSAG00000000976	ENSSSAT00000003212	hif1aa	9.51567	2.81372	4.96e-15	2.11e-11
Filet	ENSSSAG00000016696	ENSSSAT00000115669		9.56852	3.26029	3.17e-07	0.000896304
Filet	ENSSSAG00000003957	ENSSSAT00000008681		9.6401	3.36886	2.61e-06	0.0057548
Filet	ENSSSAG00000090368	ENSSSAT00000217307		9.81811	3.42548	2.57e-06	0.0057548
Filet	ENSSSAG00000008687	ENSSSAT00000185651		10.7689	3.34467	3.43e-08	0.000120027
Heart	ENSSSAG00000080589	ENSSSAT00000234268	stat6	-12.6355	3.24745	1e-28	2.18e-24
Heart	ENSSSAG00000065078	ENSSSAT00000111065	nfkb2	-10.9969	3.06536	2.6e-21	2.83e-17
Heart	ENSSSAG00000074760	ENSSSAT00000146868	sec31a	-10.964	3.05131	2.67e-22	3.88e-18
Heart	ENSSSAG00000048027	ENSSSAT00000074505	tp53bp1	-10.6985	3.02556	9.66e-21	8.41e-17
Heart	ENSSSAG00000051502	ENSSSAT00000080609	slc16a1a	-2.32806	0.428183	2.26e-09	2.4e-06
Heart	ENSSSAG00000086440	ENSSSAT00000163061	CAVIN1	-2.14615	0.951697	0.000301919	0.0199327
Heart	ENSSSAG00000040888	ENSSSAT00000069123	PDE4D	-2.01838	0.409973	2.49e-08	1.81e-05
Heart	ENSSSAG00000068846	ENSSSAT00000188037		-1.9815	0.707964	0.000148692	0.0134014
Heart	ENSSSAG00000098927	ENSSSAT00000235026		-1.91613	0.687171	0.000153747	0.0137671
Heart	ENSSSAG00000085492	ENSSSAT00000171380	ift70	-1.83753	0.663263	4.93e-05	0.00701425
Heart	ENSSSAG00000118278	ENSSSAT00000137889		-1.82873	0.724152	0.000147009	0.0133896
Heart	ENSSSAG00000073978	ENSSSAT00000133307		-1.80716	0.515411	1.37e-05	0.00301271
Heart	ENSSSAG00000065990	ENSSSAT00000110973		-1.77075	0.722255	0.000219598	0.0167711
Heart	ENSSSAG00000097601	ENSSSAT00000219762	FBN1	-1.76234	0.608827	8.87e-05	0.0100311
Heart	ENSSSAG00000040963	ENSSSAT00000060292	cdc42bpb	-1.62851	0.549845	9.93e-05	0.0107012
Heart	ENSSSAG00000003038	ENSSSAT00000012081		-1.4943	0.333236	2.26e-07	0.000129664
Heart	ENSSSAG00000073280	ENSSSAT00000205746	klf15	-1.48515	0.657667	0.000474274	0.0262006
Heart	ENSSSAG00000108490	ENSSSAT00000185720		-1.47808	0.416028	1.46e-05	0.00315132
Heart	ENSSSAG00000079488	ENSSSAT00000151618	usp9	-1.47253	0.601875	0.000384274	0.0229783
Heart	ENSSSAG00000000959	ENSSSAT00000002239	gys1	-1.46673	0.352676	1.06e-06	0.000437883
Heart	ENSSSAG00000056252	ENSSSAT00000122475	TENM3	-1.46179	0.58975	0.000393863	0.023423
Heart	ENSSSAG00000074282	ENSSSAT00000134234		-1.4408	0.401042	1.22e-05	0.00278668
Heart	ENSSSAG00000079146	ENSSSAT00000173090	LAMA3	-1.41543	0.420183	2.87e-05	0.00495183
Heart	ENSSSAG00000064884	ENSSSAT00000108115	chordc1a	-1.40155	0.570253	0.000282647	0.0192856
Heart	ENSSSAG00000047358	ENSSSAT00000084770		-1.36285	0.536823	0.000224133	0.0169244
Heart	ENSSSAG00000062181	ENSSSAT00000131222	ACTA1	-0.712451	0.336553	0.0011662	0.0462779	x
Heart	ENSSSAG00000040212	ENSSSAT00000057131	map7d1a	-1.32613	0.381704	1.88e-05	0.00368182
Heart	ENSSSAG00000009874	ENSSSAT00000021687	ankrd46b	0.356775	0.137709	0.00108734	0.0444453	x
Heart	ENSSSAG00000004801	ENSSSAT00000010269	lrat	-1.30634	0.430579	8.73e-05	0.009967
Heart	ENSSSAG00000069706	ENSSSAT00000121327	CP1A1	-1.29876	0.617012	0.000938317	0.0403697
Heart	ENSSSAG00000066339	ENSSSAT00000112172		-1.29866	0.785495	0.00115387	0.0459712
Heart	ENSSSAG00000001870	ENSSSAT00000117568	slc8a1a	-1.29036	0.347794	8.18e-06	0.00210715
Heart	ENSSSAG00000059816	ENSSSAT00000098593	HEM1	-1.28313	0.468386	0.000170586	0.0145993
Heart	ENSSSAG00000081080	ENSSSAT00000154643	ARVCF	-0.659599	0.234505	0.000244102	0.0177994	x
Heart	ENSSSAG00000080040	ENSSSAT00000248977	fam222a	-1.22442	0.26999	2.42e-07	0.000134881
Heart	ENSSSAG00000069688	ENSSSAT00000121288		-1.22257	0.449946	0.000193885	0.0157339
Heart	ENSSSAG00000008911	ENSSSAT00000019947		-1.21585	0.344334	1.67e-05	0.00340003
Heart	ENSSSAG00000058412	ENSSSAT00000111922		-1.20883	0.460541	0.000275145	0.0190423
Heart	ENSSSAG00000058808	ENSSSAT00000104576		-1.20641	0.279958	7.36e-07	0.000326804
Heart	ENSSSAG00000107044	ENSSSAT00000202739	TMEM178A	-1.20428	0.556303	0.000831541	0.0375505
Heart	ENSSSAG00000068702	ENSSSAT00000120925		-1.19207	0.506582	0.00057302	0.0296616
Heart	ENSSSAG00000080762	ENSSSAT00000154313	clasp2	-1.18068	0.506458	0.00048212	0.0264995
Heart	ENSSSAG00000076991	ENSSSAT00000144263	cdk11b	-1.16425	0.253506	2.12e-07	0.000123055
Heart	ENSSSAG00000110735	ENSSSAT00000220184	aspdh	-1.16221	0.368803	5.44e-05	0.00742863
Heart	ENSSSAG00000010242	ENSSSAT00000060617	pygma	-1.16209	0.40297	0.00012447	0.0120409
Heart	ENSSSAG00000060757	ENSSSAT00000100546	ift88	-1.15456	0.472842	0.000466769	0.0260171
Heart	ENSSSAG00000081436	ENSSSAT00000155600		-1.14925	0.303828	5.92e-06	0.0017168
Heart	ENSSSAG00000074489	ENSSSAT00000217216	lrpprc	-1.14199	0.231467	3.76e-08	2.64e-05
Heart	ENSSSAG00000000959	ENSSSAT00000002241	gys1	-1.1343	0.570626	0.000681418	0.0330697
Heart	ENSSSAG00000052041	ENSSSAT00000087945	p4ha1b	-1.13112	0.484657	0.000605747	0.0306388
Heart	ENSSSAG00000031517	ENSSSAT00000046805		-1.11801	0.269113	1.54e-06	0.000619149
Heart	ENSSSAG00000030661	ENSSSAT00000053754	AATM	-1.11725	0.362361	7.91e-05	0.00946797
Heart	ENSSSAG00000005055	ENSSSAT00000010805	PTPRB	-1.11579	0.326548	2.3e-05	0.00423096
Heart	ENSSSAG00000004886	ENSSSAT00000016653	igf2bp1	-1.10322	0.340505	3.81e-05	0.00600239
Heart	ENSSSAG00000040214	ENSSSAT00000060795		-1.10175	0.373659	0.000102384	0.0108442
Heart	ENSSSAG00000120478	ENSSSAT00000156706	tdh	-1.09533	0.216499	2.1e-08	1.63e-05
Heart	ENSSSAG00000070772	ENSSSAT00000124193		-1.09438	0.320647	2.6e-05	0.00462411
Heart	ENSSSAG00000007989	ENSSSAT00000017739		-1.08631	0.280858	4.65e-06	0.00144218
Heart	ENSSSAG00000107464	ENSSSAT00000100253		-1.08217	0.284053	5.6e-06	0.00164585
Heart	ENSSSAG00000012590	ENSSSAT00000045594		-1.08085	0.516836	0.000962545	0.0409995
Heart	ENSSSAG00000052752	ENSSSAT00000083650		-1.08043	0.413375	0.000302963	0.0199525
Heart	ENSSSAG00000086471	ENSSSAT00000084513		-1.07753	0.279147	4.46e-06	0.00140744
Heart	ENSSSAG00000120620	ENSSSAT00000078960		-1.06801	0.391899	0.000238304	0.0175075
Heart	ENSSSAG00000091484	ENSSSAT00000176121	ctnnb1	0.0344945	0.155549	0.000343749	0.0214385	x
Heart	ENSSSAG00000053814	ENSSSAT00000085333	cyp1b1	-1.0438	0.42078	0.000404783	0.0237746
Heart	ENSSSAG00000003721	ENSSSAT00000252367	CAVIN1	-1.04124	0.377463	0.00019516	0.0157339
Heart	ENSSSAG00000050237	ENSSSAT00000094381		-1.0401	0.276916	7.88e-06	0.00206835
Heart	ENSSSAG00000044736	ENSSSAT00000211099	cpox	-1.03519	0.316303	4.28e-05	0.00637187
Heart	ENSSSAG00000039751	ENSSSAT00000055825	IGFBP-5A	-1.03346	0.362277	0.000158783	0.0140206
Heart	ENSSSAG00000042664	ENSSSAT00000062779	gys1	-1.02962	0.410781	0.000334959	0.0210406
Heart	ENSSSAG00000110442	ENSSSAT00000251350		-1.02268	0.387563	0.00026402	0.0185712
Heart	ENSSSAG00000095595	ENSSSAT00000187951		-1.01912	0.370423	0.00021815	0.0167192
Heart	ENSSSAG00000105677	ENSSSAT00000229093		-1.01901	0.372926	0.000228614	0.0170411
Heart	ENSSSAG00000054319	ENSSSAT00000087917	facr1	-1.01475	0.329238	8.3e-05	0.00975347
Heart	ENSSSAG00000095191	ENSSSAT00000180279		-1.01016	0.403036	0.000430097	0.024668
Heart	ENSSSAG00000003539	ENSSSAT00000010366		-1.00824	0.267287	7.04e-06	0.001927
Heart	ENSSSAG00000050237	ENSSSAT00000093875		-1.00724	0.458236	0.000573204	0.0296616
Heart	ENSSSAG00000042664	ENSSSAT00000062821	gys1	-1.00602	0.406646	0.000322036	0.0206883
Heart	ENSSSAG00000120478	ENSSSAT00000245498	tdh	-1.00174	0.350305	0.00016093	0.0140958
Heart	ENSSSAG00000070898	ENSSSAT00000125524	ints3	-1.00148	0.221765	2.99e-07	0.000162595
Heart	ENSSSAG00000065311	ENSSSAT00000109535		-0.993147	0.383491	0.000345474	0.0215153
Heart	ENSSSAG00000093493	ENSSSAT00000188007		-0.991718	0.415034	0.000575168	0.0296616
Heart	ENSSSAG00000093278	ENSSSAT00000161227		-0.984221	0.364691	0.000259358	0.0184599
Heart	ENSSSAG00000004821	ENSSSAT00000010350	if4h	-0.975167	0.315098	8.51e-05	0.00981614
Heart	ENSSSAG00000121302	ENSSSAT00000213385	BAG5	-0.974944	0.28017	1.84e-05	0.00362825
Heart	ENSSSAG00000045777	ENSSSAT00000070388		-0.973162	0.384337	0.000413083	0.0240728
Heart	ENSSSAG00000068534	ENSSSAT00000122297		-0.971221	0.16949	5.26e-10	6.74e-07
Heart	ENSSSAG00000060154	ENSSSAT00000099116	tcf3b	-0.969568	0.33017	0.000119268	0.0118538
Heart	ENSSSAG00000010155	ENSSSAT00000022350		-0.966995	0.181341	5.22e-09	4.74e-06
Heart	ENSSSAG00000001010	ENSSSAT00000002016	kcnh6a	-0.965482	0.215849	3.35e-07	0.000179912
Heart	ENSSSAG00000114546	ENSSSAT00000232902	prkacab	-0.964553	0.324455	0.000119924	0.0118919
Heart	ENSSSAG00000114639	ENSSSAT00000208194		-0.963654	0.411536	0.000499943	0.0271365
Heart	ENSSSAG00000039519	ENSSSAT00000057181	AATM	-0.9622	0.333011	0.000148182	0.0133896
Heart	ENSSSAG00000008028	ENSSSAT00000248830	ncor2	-0.954574	0.356062	0.000293131	0.0196616
Heart	ENSSSAG00000079179	ENSSSAT00000152473		-0.951073	0.327525	0.000128626	0.0122793
Heart	ENSSSAG00000046570	ENSSSAT00000071185	rhot1a	-0.947537	0.395289	0.000567466	0.0295137
Heart	ENSSSAG00000059816	ENSSSAT00000098542	HEM1	-0.947137	0.332557	0.000148254	0.0133896
Heart	ENSSSAG00000049350	ENSSSAT00000076914		-0.944972	0.237675	3.36e-06	0.00114763
Heart	ENSSSAG00000092642	ENSSSAT00000159178	smim12	-0.941224	0.196901	8.87e-08	5.76e-05
Heart	ENSSSAG00000095565	ENSSSAT00000004436	nmnat3	-0.939225	0.361651	0.000335435	0.0210406
Heart	ENSSSAG00000040563	ENSSSAT00000170469	desma	-0.935149	0.247041	7.38e-06	0.00199474	x
Heart	ENSSSAG00000072705	ENSSSAT00000129744	aifm1	-0.934016	0.288008	5.14e-05	0.00717055
Heart	ENSSSAG00000044119	ENSSSAT00000068167	dbt	-0.930739	0.30796	0.000104192	0.0109823
Heart	ENSSSAG00000068182	ENSSSAT00000121788	tbl1xr1b	-0.929658	0.463116	0.00129662	0.049813
Heart	ENSSSAG00000072480	ENSSSAT00000129987	cpeb1b	-0.928536	0.313046	0.00012317	0.0119778
Heart	ENSSSAG00000011384	ENSSSAT00000028613	pgk1	-0.92821	0.255694	1.2e-05	0.00277741
Heart	ENSSSAG00000090105	ENSSSAT00000163467	fam210ab	-0.925986	0.409815	0.000802225	0.0365298
Heart	ENSSSAG00000063477	ENSSSAT00000104383	wars2	-0.923746	0.143807	6.99e-12	9.81e-09
Heart	ENSSSAG00000038552	ENSSSAT00000059246		-0.921357	0.340236	0.000257846	0.0184311
Heart	ENSSSAG00000013302	ENSSSAT00000028409		-0.920029	0.403566	0.000702305	0.0337042
Heart	ENSSSAG00000078313	ENSSSAT00000146122		-0.916669	0.39382	0.000548154	0.0289239
Heart	ENSSSAG00000041322	ENSSSAT00000085683	kidins220b	-0.915395	0.339407	0.000262028	0.0185712
Heart	ENSSSAG00000063964	ENSSSAT00000105645		-0.915314	0.334285	0.000232128	0.017139
Heart	ENSSSAG00000069717	ENSSSAT00000121356	gfm2	-0.908099	0.363085	0.000409122	0.023938
Heart	ENSSSAG00000081257	ENSSSAT00000155611	ABCC4	-0.902019	0.463	0.00115114	0.0459316
Heart	ENSSSAG00000087616	ENSSSAT00000235398		-0.898416	0.385292	0.00062211	0.0312001
Heart	ENSSSAG00000081733	ENSSSAT00000175998	frem2b	-0.896991	0.324809	0.000225881	0.0169244
Heart	ENSSSAG00000064590	ENSSSAT00000107426	pparab	-0.895298	0.36958	0.000549571	0.0289636
Heart	ENSSSAG00000001063	ENSSSAT00000002784	dspa	0.00849691	0.150212	0.000163482	0.014262	x
Heart	ENSSSAG00000071361	ENSSSAT00000118254	aldh4a1	-0.887352	0.295027	0.000113276	0.0115
Heart	ENSSSAG00000076685	ENSSSAT00000141223		-0.887197	0.29422	0.000108001	0.0111842
Heart	ENSSSAG00000046597	ENSSSAT00000078079	flncb	-0.579376	0.172093	4.84e-05	0.00693555	x
Heart	ENSSSAG00000120483	ENSSSAT00000235536		-0.885111	0.355468	0.000436694	0.0248824
Heart	ENSSSAG00000004375	ENSSSAT00000013487		-0.883078	0.325475	0.000263768	0.0185712
Heart	ENSSSAG00000069025	ENSSSAT00000119460	atad1b	-0.881693	0.201625	6.43e-07	0.000291366
Heart	ENSSSAG00000010173	ENSSSAT00000022531	aco2	-0.880869	0.242485	1.34e-05	0.0029924
Heart	ENSSSAG00000081935	ENSSSAT00000007607		-0.878595	0.276133	6.67e-05	0.00844589
Heart	ENSSSAG00000056533	ENSSSAT00000194169		-0.877706	0.313622	0.000205076	0.0162316
Heart	ENSSSAG00000113846	ENSSSAT00000181341	mri1	-0.876675	0.279547	7.54e-05	0.0093309
Heart	ENSSSAG00000109727	ENSSSAT00000188428	HIPK3	-0.874285	0.199976	6.33e-07	0.000290002
Heart	ENSSSAG00000043370	ENSSSAT00000182001	PSME4	-0.869952	0.229369	6.22e-06	0.00174777
Heart	ENSSSAG00000064442	ENSSSAT00000107027	got2a	-0.869676	0.211572	2.03e-06	0.000771312
Heart	ENSSSAG00000003820	ENSSSAT00000008405		-0.869554	0.342515	0.000405236	0.0237746
Heart	ENSSSAG00000044247	ENSSSAT00000215038	apaf1	-0.862556	0.349275	0.000520462	0.0279024
Heart	ENSSSAG00000009617	ENSSSAT00000224448		-0.858453	0.377877	0.000833125	0.037583
Heart	ENSSSAG00000079929	ENSSSAT00000220907	SUCLA2	-0.857748	0.351543	0.000542372	0.0287233
Heart	ENSSSAG00000078121	ENSSSAT00000207773		-0.855761	0.226537	7.89e-06	0.00206835
Heart	ENSSSAG00000070451	ENSSSAT00000123372	acat1	-0.855567	0.260876	4.83e-05	0.00693555
Heart	ENSSSAG00000070772	ENSSSAT00000202801		-0.853515	0.291094	0.000137423	0.0127283
Heart	ENSSSAG00000009584	ENSSSAT00000004099	uso1	-0.853112	0.211672	2.57e-06	0.000916891
Heart	ENSSSAG00000097278	ENSSSAT00000182353		-0.852407	0.256516	4.21e-05	0.00634965
Heart	ENSSSAG00000040926	ENSSSAT00000058730	usp5	-0.849857	0.160017	6.06e-09	5.39e-06
Heart	ENSSSAG00000065990	ENSSSAT00000252623		-0.849114	0.362684	0.000664175	0.0325009
Heart	ENSSSAG00000101039	ENSSSAT00000246956		-0.849019	0.282943	0.000111065	0.01143
Heart	ENSSSAG00000046597	ENSSSAT00000078011	flncb	-0.423845	0.158853	0.000653652	0.0321523	x
Heart	ENSSSAG00000046597	ENSSSAT00000078699	flncb	0.00812287	0.150181	2.53e-16	6.88e-13	x
Heart	ENSSSAG00000079384	ENSSSAT00000122018	COL5A1	-0.840052	0.378693	0.000938486	0.0403697
Heart	ENSSSAG00000117697	ENSSSAT00000182059		-0.83908	0.333311	0.000471705	0.0261583
Heart	ENSSSAG00000109669	ENSSSAT00000067538	hgs	-0.837421	0.361947	0.000735058	0.0348568
Heart	ENSSSAG00000041761	ENSSSAT00000013105	rilpl1	-0.834551	0.293241	0.000189568	0.015551
Heart	ENSSSAG00000081708	ENSSSAT00000156479	SLC25A12	-0.832956	0.256507	5.46e-05	0.00742863
Heart	ENSSSAG00000008212	ENSSSAT00000019236		-0.827659	0.223952	1.1e-05	0.00264919
Heart	ENSSSAG00000070531	ENSSSAT00000131065		-0.824482	0.236325	2.26e-05	0.00418202
Heart	ENSSSAG00000095383	ENSSSAT00000225776	tigara	-0.823699	0.334831	0.000557015	0.0292827
Heart	ENSSSAG00000046083	ENSSSAT00000071151		-0.823665	0.360688	0.000688814	0.0333172
Heart	ENSSSAG00000078121	ENSSSAT00000019054		-0.822731	0.17647	1.67e-07	0.000103886
Heart	ENSSSAG00000093886	ENSSSAT00000167773	mtfr1l	-0.8213	0.231457	1.91e-05	0.00370689
Heart	ENSSSAG00000060254	ENSSSAT00000098911		-0.821134	0.282341	0.000147681	0.0133896
Heart	ENSSSAG00000116094	ENSSSAT00000182864		-0.819525	0.230676	1.9e-05	0.00370101
Heart	ENSSSAG00000078313	ENSSSAT00000146159		-0.817562	0.276455	0.000123267	0.0119778
Heart	ENSSSAG00000052259	ENSSSAT00000189440		-0.814824	0.352706	0.000768063	0.035593
Heart	ENSSSAG00000086471	ENSSSAT00000202083		-0.814543	0.232982	2.31e-05	0.00423109
Heart	ENSSSAG00000070742	ENSSSAT00000124102		-0.808173	0.345996	0.000712979	0.0340322
Heart	ENSSSAG00000039777	ENSSSAT00000234386	JPH2	-0.806457	0.262829	9.97e-05	0.0107124
Heart	ENSSSAG00000051184	ENSSSAT00000080051	tbl1xr1b	-0.803716	0.234898	3.16e-05	0.00531719
Heart	ENSSSAG00000043495	ENSSSAT00000046584		-0.802475	0.259873	9.37e-05	0.0103535
Heart	ENSSSAG00000081711	ENSSSAT00000198334		-0.797833	0.355069	0.000880286	0.0389437
Heart	ENSSSAG00000071490	ENSSSAT00000126115	akap1b	-0.793238	0.267284	0.000131025	0.0123996
Heart	ENSSSAG00000049346	ENSSSAT00000173765		-0.79128	0.23984	4.67e-05	0.00681412
Heart	ENSSSAG00000038579	ENSSSAT00000059997		-0.78972	0.281524	0.000223361	0.0169244
Heart	ENSSSAG00000048530	ENSSSAT00000075279		-0.788926	0.26325	0.000122918	0.0119778
Heart	ENSSSAG00000107371	ENSSSAT00000160306		-0.784695	0.332568	0.000688512	0.0333172
Heart	ENSSSAG00000000891	ENSSSAT00000002242	pdha1a	-0.784149	0.200283	4.84e-06	0.00146361
Heart	ENSSSAG00000054109	ENSSSAT00000086100		-0.781925	0.357196	0.000782341	0.0360582
Heart	ENSSSAG00000039266	ENSSSAT00000055121	ATAD3A	-0.7812	0.198847	3.93e-06	0.00129743
Heart	ENSSSAG00000098304	ENSSSAT00000188471		-0.781078	0.258891	0.000116765	0.011712
Heart	ENSSSAG00000058499	ENSSSAT00000131108		-0.779826	0.308791	0.000434377	0.0247828
Heart	ENSSSAG00000098886	ENSSSAT00000158960		-0.779305	0.241268	5.58e-05	0.00749151
Heart	ENSSSAG00000087843	ENSSSAT00000185637	eif4eb	-0.777804	0.26757	0.000174134	0.0148344
Heart	ENSSSAG00000100405	ENSSSAT00000170421	mrps6	-0.776713	0.274353	0.000195299	0.0157339
Heart	ENSSSAG00000042984	ENSSSAT00000066341		-0.775761	0.31558	0.000525656	0.0281116
Heart	ENSSSAG00000112497	ENSSSAT00000195714		-0.772423	0.262319	0.000143852	0.0132128
Heart	ENSSSAG00000119061	ENSSSAT00000199007		-0.771191	0.268728	0.000184606	0.0153072
Heart	ENSSSAG00000084590	ENSSSAT00000114578	tsfm	-0.76844	0.234239	4.69e-05	0.00681412
Heart	ENSSSAG00000051658	ENSSSAT00000086260	caprin1a	-0.768089	0.329751	0.000741995	0.0350542
Heart	ENSSSAG00000084004	ENSSSAT00000211299	rab5b	-0.766798	0.2204	2.55e-05	0.0045573
Heart	ENSSSAG00000054694	ENSSSAT00000160813	COPB2	-0.76612	0.332261	0.000731086	0.0347441
Heart	ENSSSAG00000008139	ENSSSAT00000018070	suclg1	-0.764143	0.265779	0.000175292	0.014864
Heart	ENSSSAG00000066179	ENSSSAT00000111523	acot13	-0.76321	0.228622	4.02e-05	0.00616621
Heart	ENSSSAG00000066886	ENSSSAT00000127565	flncb	-0.888013	0.274417	4.53e-05	0.00664478	x
Heart	ENSSSAG00000081674	ENSSSAT00000156364		-0.760484	0.230817	4.81e-05	0.00693555
Heart	ENSSSAG00000007436	ENSSSAT00000247299		-0.760159	0.227596	4.23e-05	0.00634965
Heart	ENSSSAG00000073942	ENSSSAT00000144576	SPTBN1	-0.759667	0.353139	0.00108975	0.0444996
Heart	ENSSSAG00000064442	ENSSSAT00000054165	got2a	-0.757954	0.265155	0.000168203	0.0144682
Heart	ENSSSAG00000113466	ENSSSAT00000105536		-0.750702	0.329158	0.000859582	0.0383002
Heart	ENSSSAG00000054720	ENSSSAT00000087866	ahctf1	-0.75055	0.239372	7.82e-05	0.00944407
Heart	ENSSSAG00000051692	ENSSSAT00000081084	tnni1c	-0.749058	0.284024	0.000358012	0.0219116
Heart	ENSSSAG00000068263	ENSSSAT00000117589	slc6a6	-0.748957	0.209055	1.69e-05	0.00341436
Heart	ENSSSAG00000048030	ENSSSAT00000222149		-0.748807	0.288358	0.000412505	0.0240713
Heart	ENSSSAG00000039337	ENSSSAT00000056000		-0.74445	0.204199	1.43e-05	0.0031045
Heart	ENSSSAG00000074260	ENSSSAT00000136810		-0.743696	0.253435	0.000160629	0.0140958
Heart	ENSSSAG00000113763	ENSSSAT00000247769	cavin4a	-0.743489	0.338748	0.00109841	0.0446879
Heart	ENSSSAG00000044736	ENSSSAT00000066976	cpox	-0.743439	0.31285	0.000632983	0.0315294
Heart	ENSSSAG00000005536	ENSSSAT00000212227		-0.742609	0.154385	1.02e-07	6.52e-05
Heart	ENSSSAG00000117867	ENSSSAT00000246249		-0.741904	0.222514	4.29e-05	0.00637187
Heart	ENSSSAG00000051920	ENSSSAT00000083800	dpp3	-0.740318	0.240098	0.000100795	0.0107544
Heart	ENSSSAG00000094035	ENSSSAT00000167971	ABCC1	-0.740158	0.240131	9.35e-05	0.0103535
Heart	ENSSSAG00000068177	ENSSSAT00000117157		-0.739797	0.288973	0.000446762	0.0252577
Heart	ENSSSAG00000073172	ENSSSAT00000131036		-0.739223	0.191212	5.76e-06	0.00168259
Heart	ENSSSAG00000071534	ENSSSAT00000126389	kars1	-0.738847	0.182706	3.02e-06	0.00105777
Heart	ENSSSAG00000080526	ENSSSAT00000152835		-0.736712	0.282535	0.000363187	0.0220199
Heart	ENSSSAG00000062905	ENSSSAT00000103540		-0.736372	0.340858	0.00114935	0.0459055
Heart	ENSSSAG00000040671	ENSSSAT00000057843	phb2b	-0.736177	0.202523	1.52e-05	0.00317176
Heart	ENSSSAG00000062933	ENSSSAT00000103009	fkbp8	-0.736072	0.289216	0.000466546	0.0260171
Heart	ENSSSAG00000096623	ENSSSAT00000144873	psmd1	-0.728723	0.182908	3.91e-06	0.00129743
Heart	ENSSSAG00000109898	ENSSSAT00000209395	rad21a	-0.726053	0.135537	5.2e-09	4.74e-06
Heart	ENSSSAG00000081432	ENSSSAT00000155583	hspd1	-0.723914	0.339424	0.00120407	0.0471478
Heart	ENSSSAG00000067160	ENSSSAT00000119849		-0.7237	0.173972	1.81e-06	0.00071095
Heart	ENSSSAG00000108573	ENSSSAT00000121240	PPARGC1A	-0.722095	0.196901	1.36e-05	0.00300059
Heart	ENSSSAG00000072629	ENSSSAT00000143871	usp9	-0.719009	0.332848	0.000989092	0.041649
Heart	ENSSSAG00000105306	ENSSSAT00000107414	TIM8A	-0.716808	0.279912	0.000474182	0.0262006
Heart	ENSSSAG00000087967	ENSSSAT00000223886		-0.716534	0.30943	0.000851688	0.0380654
Heart	ENSSSAG00000074067	ENSSSAT00000134688	COPB2	-0.716511	0.268706	0.000347217	0.0215508
Heart	ENSSSAG00000076158	ENSSSAT00000139668	canx	-0.715386	0.249473	0.000195915	0.0157339
Heart	ENSSSAG00000006683	ENSSSAT00000015831	kpyk	-0.713775	0.198104	1.72e-05	0.00344766
Heart	ENSSSAG00000073644	ENSSSAT00000097125	ITGA7	-0.761468	0.24286	8.16e-05	0.00967482	x
Heart	ENSSSAG00000074349	ENSSSAT00000136211		-0.710994	0.253158	0.000231695	0.017139
Heart	ENSSSAG00000076539	ENSSSAT00000141152		-0.710814	0.306287	0.000784878	0.0361177
Heart	ENSSSAG00000043281	ENSSSAT00000138874	tpi1b	-0.710023	0.129106	1.97e-09	2.2e-06
Heart	ENSSSAG00000041527	ENSSSAT00000059608	RM46	-0.705196	0.185242	7.41e-06	0.00199474
Heart	ENSSSAG00000047960	ENSSSAT00000083190		-0.701425	0.259271	0.000293467	0.0196616
Heart	ENSSSAG00000005715	ENSSSAT00000012604		-0.69964	0.300604	0.00084948	0.0380448
Heart	ENSSSAG00000090988	ENSSSAT00000164270	TRAP1	-0.697953	0.226615	0.000105652	0.0110471
Heart	ENSSSAG00000061450	ENSSSAT00000100840		-0.696649	0.243806	0.000210196	0.0163398
Heart	ENSSSAG00000092349	ENSSSAT00000178632	rnls	-0.69594	0.183266	8.18e-06	0.00210715
Heart	ENSSSAG00000069678	ENSSSAT00000124673		-0.694735	0.288786	0.000676112	0.0328855
Heart	ENSSSAG00000048873	ENSSSAT00000089397		-0.69438	0.249653	0.000245381	0.0178329
Heart	ENSSSAG00000062878	ENSSSAT00000102911	ell	-0.69219	0.251872	0.000287248	0.0195078
Heart	ENSSSAG00000046794	ENSSSAT00000075788		-0.69136	0.20581	4.24e-05	0.00634965
Heart	ENSSSAG00000005924	ENSSSAT00000012823	oxa1l	-0.688419	0.21463	7.11e-05	0.00884657
Heart	ENSSSAG00000082447	ENSSSAT00000201117	msrb3	-0.687653	0.254011	0.000293435	0.0196616
Heart	ENSSSAG00000120620	ENSSSAT00000234758		-0.685382	0.293177	0.000794259	0.0363648
Heart	ENSSSAG00000053474	ENSSSAT00000108467	pmpcb	-0.685039	0.205426	4.7e-05	0.00681412
Heart	ENSSSAG00000094472	ENSSSAT00000199920		-0.684197	0.314578	0.00122474	0.0475675
Heart	ENSSSAG00000068960	ENSSSAT00000119249	stard8	-0.683517	0.234308	0.000175592	0.014864
Heart	ENSSSAG00000112860	ENSSSAT00000126360	pgm5	-0.681754	0.176972	6.7e-06	0.00184697
Heart	ENSSSAG00000008206	ENSSSAT00000186592	pgam1b	-0.681044	0.29629	0.000904414	0.0395688
Heart	ENSSSAG00000051502	ENSSSAT00000123611	slc16a1a	-0.67989	0.218467	9.93e-05	0.0107012
Heart	ENSSSAG00000092692	ENSSSAT00000239001		-0.67932	0.305237	0.00109174	0.0444996
Heart	ENSSSAG00000073314	ENSSSAT00000215992		-0.678913	0.308864	0.00116002	0.0460749
Heart	ENSSSAG00000078739	ENSSSAT00000147489		-0.678526	0.254273	0.000353631	0.021774
Heart	ENSSSAG00000078738	ENSSSAT00000148077	dync1h1	-0.677946	0.235034	0.000199521	0.0158495
Heart	ENSSSAG00000076655	ENSSSAT00000228380	tefm	-0.67716	0.241525	0.000251981	0.0181188
Heart	ENSSSAG00000081486	ENSSSAT00000155748	ndufa10	-0.677036	0.224635	0.000135436	0.0126519
Heart	ENSSSAG00000055881	ENSSSAT00000090323		-0.67584	0.174834	6.36e-06	0.00176396
Heart	ENSSSAG00000068160	ENSSSAT00000119604	vwa8	-0.675098	0.250922	0.000356173	0.021844
Heart	ENSSSAG00000107443	ENSSSAT00000176766		-0.675062	0.188825	1.79e-05	0.00354984
Heart	ENSSSAG00000075825	ENSSSAT00000143856	nrd1b	-0.673882	0.200665	4.22e-05	0.00634965
Heart	ENSSSAG00000109121	ENSSSAT00000188707	mrpl12	-0.672668	0.143233	1.66e-07	0.000103886
Heart	ENSSSAG00000061401	ENSSSAT00000100648	c1qbp	-0.671398	0.314992	0.00126511	0.0487371
Heart	ENSSSAG00000045784	ENSSSAT00000185765	rhpn2	-0.671287	0.232175	0.000176349	0.014864
Heart	ENSSSAG00000092652	ENSSSAT00000198527		-0.669616	0.279055	0.000752196	0.0353818
Heart	ENSSSAG00000061401	ENSSSAT00000100694	c1qbp	-0.668497	0.237601	0.00023691	0.0174504
Adductor mandibulae	ENSSSAG00000075460	ENSSSAT00000057457	itgav	-0.00474741	0.0574469	4.32e-07	0.00103442	x
Heart	ENSSSAG00000113059	ENSSSAT00000234913		-0.664516	0.3024	0.00118606	0.04681
Heart	ENSSSAG00000118725	ENSSSAT00000213081		-0.663135	0.230705	0.000214578	0.016562
Heart	ENSSSAG00000106231	ENSSSAT00000058553		-0.66291	0.179279	1.25e-05	0.00283049
Heart	ENSSSAG00000080215	ENSSSAT00000151776	ecsit	-0.661822	0.20361	6.22e-05	0.00806482
Heart	ENSSSAG00000003591	ENSSSAT00000007866		-0.660425	0.2665	0.000620083	0.0311527
Adductor mandibulae	ENSSSAG00000035636	ENSSSAT00000051063	lmnb1	-0.0134962	0.0595013	2.87e-05	0.034788	x
Heart	ENSSSAG00000059290	ENSSSAT00000097368	wscd2	-0.658004	0.257925	0.000512544	0.0275777
Heart	ENSSSAG00000079929	ENSSSAT00000151297	SUCLA2	-0.656883	0.215906	0.000127005	0.0122049
Heart	ENSSSAG00000009738	ENSSSAT00000106495	HUWE1	-0.656479	0.224816	0.000177667	0.0149021
Heart	ENSSSAG00000003745	ENSSSAT00000008161	ndufs8a	-0.655815	0.241778	0.000322215	0.0206883
Heart	ENSSSAG00000073399	ENSSSAT00000131663	tsen54	-0.65559	0.265986	0.000634139	0.0315294
Heart	ENSSSAG00000065309	ENSSSAT00000114033		-0.652115	0.243529	0.000334787	0.0210406
Heart	ENSSSAG00000073120	ENSSSAT00000133503		-0.651998	0.258021	0.000538223	0.0285731
Heart	ENSSSAG00000065319	ENSSSAT00000112792	pmpca	-0.651814	0.178576	1.47e-05	0.00315903
Heart	ENSSSAG00000004005	ENSSSAT00000227641	ccdc43	-0.650662	0.193078	4.2e-05	0.00634965
Heart	ENSSSAG00000009601	ENSSSAT00000133215		-0.649119	0.212477	0.000122056	0.0119401
Heart	ENSSSAG00000080138	ENSSSAT00000240517	GCN1	-0.64733	0.220495	0.000182473	0.0151962
Heart	ENSSSAG00000009667	ENSSSAT00000022361		-0.647266	0.215625	0.0001418	0.0131058
Heart	ENSSSAG00000121096	ENSSSAT00000054432		-0.647006	0.215834	0.000147796	0.0133896
Heart	ENSSSAG00000068907	ENSSSAT00000119131		-0.644691	0.151373	1.34e-06	0.000543221
Heart	ENSSSAG00000073320	ENSSSAT00000131430		-0.643984	0.195684	5.66e-05	0.00749451
Heart	ENSSSAG00000001932	ENSSSAT00000166801		-0.642763	0.261256	0.000599226	0.0305451
Heart	ENSSSAG00000120928	ENSSSAT00000216971	ndufs8a	-0.640561	0.200883	8.35e-05	0.00975347
Heart	ENSSSAG00000063310	ENSSSAT00000158236		-0.638641	0.242766	0.000416514	0.0241756
Heart	ENSSSAG00000106914	ENSSSAT00000105066	nsfl1c	-0.637974	0.136953	1.98e-07	0.000119781
Heart	ENSSSAG00000071028	ENSSSAT00000124907		-0.637468	0.169975	1.08e-05	0.00263497
Heart	ENSSSAG00000110807	ENSSSAT00000135319	extl3	-0.637286	0.247034	0.00052445	0.0280816
Heart	ENSSSAG00000047778	ENSSSAT00000085642	GRP75	-0.63712	0.276138	0.000901745	0.0395315
Heart	ENSSSAG00000040632	ENSSSAT00000209603	siah2l	-0.635377	0.192192	5.48e-05	0.00742863
Heart	ENSSSAG00000015794	ENSSSAT00000223957	mrpl4	-0.635331	0.197175	6.71e-05	0.00846584
Heart	ENSSSAG00000041054	ENSSSAT00000204957		-0.62912	0.266891	0.000874536	0.0387681
Heart	ENSSSAG00000006564	ENSSSAT00000218526	SETD5	-0.628841	0.178248	2.55e-05	0.0045573
Heart	ENSSSAG00000001906	ENSSSAT00000244936	ACO2	-0.628767	0.256214	0.000664472	0.0325009
Heart	ENSSSAG00000007329	ENSSSAT00000056521	slc25a12	-0.627941	0.275022	0.000970481	0.0412166
Heart	ENSSSAG00000047621	ENSSSAT00000073528		-0.626019	0.226003	0.000299419	0.0198356
Heart	ENSSSAG00000055677	ENSSSAT00000135568		-0.624954	0.205568	0.000137209	0.0127283
Heart	ENSSSAG00000074079	ENSSSAT00000133598		-0.623765	0.248437	0.000528109	0.0282082
Heart	ENSSSAG00000061136	ENSSSAT00000226725	pdhb	-0.623153	0.284243	0.00122755	0.0476271
Heart	ENSSSAG00000076968	ENSSSAT00000142179	samm50l	-0.621132	0.187672	6e-05	0.00781876
Heart	ENSSSAG00000063977	ENSSSAT00000160956	abhd18	-0.620383	0.212103	0.000191888	0.0156722
Heart	ENSSSAG00000054921	ENSSSAT00000089063		-0.619985	0.243038	0.000544121	0.0287809
Heart	ENSSSAG00000055890	ENSSSAT00000090705	timm44	-0.618771	0.186969	5.37e-05	0.00737011
Heart	ENSSSAG00000076316	ENSSSAT00000140171	slc43a1b	-0.618747	0.280941	0.00127474	0.0490646
Heart	ENSSSAG00000039406	ENSSSAT00000055171	ccnk	-0.617842	0.176965	3.04e-05	0.00514102
Heart	ENSSSAG00000009601	ENSSSAT00000021367		-0.617591	0.210117	0.000184302	0.0153072
Heart	ENSSSAG00000075415	ENSSSAT00000137483	PPIF	-0.613603	0.222489	0.000313462	0.0203363
Heart	ENSSSAG00000069915	ENSSSAT00000161458	cox10	-0.61337	0.210864	0.00018948	0.015551
Heart	ENSSSAG00000039596	ENSSSAT00000056585		-0.61318	0.273966	0.00117752	0.0466424
Heart	ENSSSAG00000041806	ENSSSAT00000060494		-0.612256	0.241671	0.00058555	0.0300381
Heart	ENSSSAG00000038956	ENSSSAT00000067716	clcn3	-0.611575	0.248721	0.000692366	0.0334147
Heart	ENSSSAG00000010292	ENSSSAT00000022637	timm29	-0.609936	0.169735	2.02e-05	0.00387117
Heart	ENSSSAG00000039665	ENSSSAT00000056724		-0.607514	0.198669	0.000121115	0.0119056
Heart	ENSSSAG00000074712	ENSSSAT00000135555	si:ch211-215a10.4	-0.603739	0.199969	0.000143868	0.0132128
Heart	ENSSSAG00000101640	ENSSSAT00000058717		-0.603303	0.209197	0.000225439	0.0169244
Heart	ENSSSAG00000003553	ENSSSAT00000007736	psd3	-0.602097	0.263765	0.00108001	0.0442286
Heart	ENSSSAG00000049764	ENSSSAT00000077990		-0.602095	0.185058	7.04e-05	0.0087765
Heart	ENSSSAG00000102068	ENSSSAT00000244582		-0.600741	0.143455	1.9e-06	0.000733685
Heart	ENSSSAG00000006637	ENSSSAT00000017594		-0.598817	0.198118	0.000154516	0.0137836
Heart	ENSSSAG00000006479	ENSSSAT00000015332	APP	-0.598394	0.264484	0.000993986	0.0416861
Heart	ENSSSAG00000083490	ENSSSAT00000191379	arhgef1b	-0.596799	0.267907	0.00122492	0.0475675
Heart	ENSSSAG00000094099	ENSSSAT00000177615		-0.593977	0.213344	0.000287199	0.0195078
Heart	ENSSSAG00000094520	ENSSSAT00000191062	foxn3	-0.592901	0.191062	0.000115073	0.0115957
Heart	ENSSSAG00000063357	ENSSSAT00000105846	SCRIB	-0.592809	0.262955	0.00118387	0.0467661
Heart	ENSSSAG00000056554	ENSSSAT00000091968		-0.591005	0.24947	0.000911473	0.039718
Heart	ENSSSAG00000079064	ENSSSAT00000152732		-0.59097	0.214657	0.000310986	0.0202057
Heart	ENSSSAG00000064516	ENSSSAT00000107721		-0.590802	0.199763	0.000185102	0.0153191
Heart	ENSSSAG00000063954	ENSSSAT00000105609	immt	-0.588785	0.217211	0.000349634	0.0216197
Heart	ENSSSAG00000100599	ENSSSAT00000221592	timm10	-0.588261	0.1795	6.67e-05	0.00844589
Heart	ENSSSAG00000119392	ENSSSAT00000215210		-0.587211	0.163723	2.2e-05	0.00412874
Heart	ENSSSAG00000075825	ENSSSAT00000143867	nrd1b	-0.586887	0.249263	0.000934811	0.0403697
Heart	ENSSSAG00000082949	ENSSSAT00000200344		-0.583454	0.186302	0.000106075	0.0110471
Heart	ENSSSAG00000007320	ENSSSAT00000015965	AT5G3	-0.583025	0.218886	0.000432707	0.0247524
Heart	ENSSSAG00000053757	ENSSSAT00000085231	hspe1	-0.582832	0.197909	0.00018969	0.015551
Heart	ENSSSAG00000118278	ENSSSAT00000242990		-0.581975	0.208319	0.000302206	0.0199327
Heart	ENSSSAG00000004944	ENSSSAT00000010552	il11ra	-0.579982	0.146961	5.52e-06	0.0016332
Heart	ENSSSAG00000052180	ENSSSAT00000082008	lmo2	0.635084	0.1508	1.64e-06	0.000656077	x
Adductor mandibulae	ENSSSAG00000082643	ENSSSAT00000253959	myh10	9.13683	3.30238	2.91e-06	0.00593038	x
Heart	ENSSSAG00000053108	ENSSSAT00000083941		-0.577467	0.249156	0.00099667	0.0417183
Heart	ENSSSAG00000085160	ENSSSAT00000164340		-0.577433	0.169238	4.21e-05	0.00634965
Heart	ENSSSAG00000051706	ENSSSAT00000086987		-0.573923	0.161277	2.41e-05	0.00436649
Heart	ENSSSAG00000093297	ENSSSAT00000204926	dbpa	-0.572663	0.252976	0.00119739	0.0470205
Heart	ENSSSAG00000098771	ENSSSAT00000211238		-0.572186	0.170593	5.19e-05	0.00721476
Heart	ENSSSAG00000109815	ENSSSAT00000207506	uhmk1	-0.570444	0.242414	0.000991621	0.041649
Heart	ENSSSAG00000067258	ENSSSAT00000114459	ndufa9a	-0.5691	0.251532	0.0012032	0.0471478
Heart	ENSSSAG00000096175	ENSSSAT00000161050	acat2	-0.567908	0.232221	0.000765229	0.035593
Heart	ENSSSAG00000007816	ENSSSAT00000017280	lrrc39	-0.567595	0.187045	0.00014731	0.0133896
Heart	ENSSSAG00000118623	ENSSSAT00000233793	wbp1	-0.567568	0.141284	4.26e-06	0.00137374
Heart	ENSSSAG00000081441	ENSSSAT00000244783	hspe1	-0.565318	0.174644	7.92e-05	0.00946797
Heart	ENSSSAG00000005540	ENSSSAT00000012208	ubap2l	-0.565315	0.182414	0.000112403	0.0115
Heart	ENSSSAG00000055241	ENSSSAT00000088703	foxo3b	-0.565273	0.13523	2.13e-06	0.000798062
Heart	ENSSSAG00000074353	ENSSSAT00000168002	ndufs6	-0.563801	0.230684	0.000796446	0.0363874
Heart	ENSSSAG00000064277	ENSSSAT00000204232	CHP1	-0.563747	0.176974	8.78e-05	0.00997475
Heart	ENSSSAG00000049398	ENSSSAT00000077020		-0.562019	0.214927	0.000511996	0.0275777
Heart	ENSSSAG00000058131	ENSSSAT00000096174	PDK1	-0.56148	0.152743	1.63e-05	0.003327
Heart	ENSSSAG00000001473	ENSSSAT00000003049	GOT1	-0.561331	0.20822	0.00039954	0.0236265
Heart	ENSSSAG00000076264	ENSSSAT00000140202	aacs	-0.559015	0.234557	0.000922814	0.0400119
Heart	ENSSSAG00000040541	ENSSSAT00000060965	hipk3a	-0.55842	0.204513	0.000358382	0.0219116
Heart	ENSSSAG00000079929	ENSSSAT00000151347	SUCLA2	-0.557044	0.19575	0.000274174	0.0190053
Heart	ENSSSAG00000090988	ENSSSAT00000065817	TRAP1	-0.55672	0.229461	0.000812604	0.0368099
Heart	ENSSSAG00000040541	ENSSSAT00000060626	hipk3a	-0.552781	0.239884	0.00111363	0.0449139
Heart	ENSSSAG00000041554	ENSSSAT00000059674	hmgb3b	-0.552393	0.221332	0.000759004	0.0354828
Heart	ENSSSAG00000072585	ENSSSAT00000129587	ACSF3	-0.550866	0.242498	0.00121356	0.0472953
Heart	ENSSSAG00000064080	ENSSSAT00000095939	supv3l1	-0.550348	0.231977	0.000991184	0.041649
Heart	ENSSSAG00000001125	ENSSSAT00000002559		-0.549313	0.204856	0.000441207	0.0250739
Heart	ENSSSAG00000041548	ENSSSAT00000219138		-0.54893	0.204862	0.000489046	0.0267116
Heart	ENSSSAG00000071572	ENSSSAT00000126354		-0.547407	0.224147	0.000856922	0.0382208
Heart	ENSSSAG00000041331	ENSSSAT00000067232		-0.546732	0.14791	1.49e-05	0.00317176
Heart	ENSSSAG00000004305	ENSSSAT00000009426	gtpbp1l	-0.545406	0.213401	0.00061919	0.0311527
Heart	ENSSSAG00000055215	ENSSSAT00000110626	hdlbpa	-0.545232	0.199791	0.000325019	0.0207764
Heart	ENSSSAG00000010103	ENSSSAT00000022245	SOD1	-0.543807	0.135838	4.67e-06	0.00144218
Heart	ENSSSAG00000098080	ENSSSAT00000225922	HBP1	-0.541705	0.225633	0.000889408	0.0391627
Heart	ENSSSAG00000042378	ENSSSAT00000062039		-0.540735	0.15073	2.21e-05	0.00412874
Heart	ENSSSAG00000078388	ENSSSAT00000149525	DGKZ	-0.540481	0.191199	0.000297459	0.0197864
Heart	ENSSSAG00000088182	ENSSSAT00000218420	si:ch73-21k16.4	-0.535729	0.219226	0.000847156	0.0380246
Heart	ENSSSAG00000042266	ENSSSAT00000066882		-0.535501	0.207921	0.000607453	0.0306771
Heart	ENSSSAG00000004360	ENSSSAT00000012273		-0.534771	0.223512	0.000953005	0.0407127
Heart	ENSSSAG00000043221	ENSSSAT00000071594		-0.534029	0.119171	6.03e-07	0.000279133
Heart	ENSSSAG00000052155	ENSSSAT00000082274		-0.533864	0.225344	0.0010567	0.0434372
Heart	ENSSSAG00000066161	ENSSSAT00000112522		-0.531686	0.219217	0.000915668	0.0398211
Heart	ENSSSAG00000002929	ENSSSAT00000006261	GNB4	-0.529915	0.169517	0.000112839	0.0115
Heart	ENSSSAG00000079033	ENSSSAT00000148307	mrps25	-0.527552	0.162047	7.61e-05	0.00938491
Heart	ENSSSAG00000110460	ENSSSAT00000232634		-0.523336	0.131423	4.75e-06	0.00145568
Heart	ENSSSAG00000072788	ENSSSAT00000129885	ppcs	-0.523121	0.168659	0.000134663	0.0126067
Heart	ENSSSAG00000029815	ENSSSAT00000053311		-0.522193	0.206051	0.000639386	0.0316293
Heart	ENSSSAG00000092912	ENSSSAT00000201537		-0.521309	0.20862	0.000734672	0.0348568
Heart	ENSSSAG00000045401	ENSSSAT00000068446		-0.519316	0.111191	2.42e-07	0.000134881
Heart	ENSSSAG00000049415	ENSSSAT00000202953	srl	-0.519027	0.216674	0.000996092	0.0417183
Heart	ENSSSAG00000077443	ENSSSAT00000143612	mgll	-0.518734	0.189901	0.000428973	0.024636
Heart	ENSSSAG00000069481	ENSSSAT00000121566		-0.516449	0.146169	2.95e-05	0.00507128
Heart	ENSSSAG00000052128	ENSSSAT00000081941	MDH1	-0.516257	0.201125	0.000635829	0.0315294
Heart	ENSSSAG00000030127	ENSSSAT00000056505	EPAS1	-0.51609	0.17964	0.000276115	0.0190571
Heart	ENSSSAG00000112918	ENSSSAT00000115318	PITRM1	-0.513605	0.112758	4.03e-07	0.000209036
Heart	ENSSSAG00000008774	ENSSSAT00000210509	dhx35	-0.5122	0.193864	0.000501058	0.0271632
Heart	ENSSSAG00000066262	ENSSSAT00000111954	pals1a	-0.511543	0.189717	0.000466116	0.0260171
Heart	ENSSSAG00000108938	ENSSSAT00000170332	ZNF827	-0.510886	0.203466	0.000762454	0.0355747
Heart	ENSSSAG00000041485	ENSSSAT00000059727		-0.508896	0.178396	0.000297414	0.0197864
Heart	ENSSSAG00000121563	ENSSSAT00000222813	sdhdb	-0.508194	0.132551	9.75e-06	0.00244822
Heart	ENSSSAG00000054606	ENSSSAT00000087207	endog	-0.5072	0.146502	4.02e-05	0.00616621
Heart	ENSSSAG00000052276	ENSSSAT00000245197	epb41l3b	-0.506282	0.179907	0.000361675	0.0219895
Heart	ENSSSAG00000065945	ENSSSAT00000110871	ube2r2	-0.504632	0.203833	0.000847612	0.0380246
Heart	ENSSSAG00000063964	ENSSSAT00000204348		-0.500657	0.1758	0.000299821	0.0198356
Heart	ENSSSAG00000049601	ENSSSAT00000214934	ARHGAP35	-0.500002	0.148768	5.83e-05	0.00768435
Heart	ENSSSAG00000004592	ENSSSAT00000010050	suclg1	-0.499166	0.212292	0.00117048	0.0464056
Heart	ENSSSAG00000100996	ENSSSAT00000188924	dbpa	-0.499155	0.193725	0.000669273	0.0326258
Heart	ENSSSAG00000004843	ENSSSAT00000010395	hipk3a	-0.498534	0.108656	4e-07	0.000209036
Heart	ENSSSAG00000076091	ENSSSAT00000139601	psme3	-0.498252	0.162338	0.000159205	0.0140294
Heart	ENSSSAG00000000193	ENSSSAT00000000315	tmem186	-0.497796	0.213822	0.00119735	0.0470205
Heart	ENSSSAG00000076540	ENSSSAT00000140995	usp5	-0.497384	0.125192	6.04e-06	0.00172777
Heart	ENSSSAG00000116562	ENSSSAT00000198339	timm23a	-0.496395	0.184319	0.000460465	0.0257979
Heart	ENSSSAG00000050349	ENSSSAT00000078572	mief1	-0.495642	0.123015	4.44e-06	0.00140744
Heart	ENSSSAG00000044994	ENSSSAT00000251412	iars1	-0.49467	0.189167	0.000604	0.0306388
Heart	ENSSSAG00000071199	ENSSSAT00000176397		-0.493733	0.15469	0.000108296	0.0111842
Heart	ENSSSAG00000073700	ENSSSAT00000132575	tmem126a	-0.49226	0.14635	5.97e-05	0.00779991
Heart	ENSSSAG00000043623	ENSSSAT00000067014		-0.492035	0.20655	0.00107718	0.0441958
Heart	ENSSSAG00000002735	ENSSSAT00000005809	mrpl12	-0.49109	0.149895	8.01e-05	0.00953159
Heart	ENSSSAG00000079537	ENSSSAT00000150380		-0.489554	0.208666	0.00113324	0.0454255
Heart	ENSSSAG00000105119	ENSSSAT00000164479		-0.488427	0.203538	0.00110887	0.0449139
Heart	ENSSSAG00000074820	ENSSSAT00000135887	aurkaip1	-0.488142	0.0966163	3.98e-08	2.71e-05
Heart	ENSSSAG00000085165	ENSSSAT00000223783	ptgesl	-0.487863	0.19423	0.000798906	0.0364549
Heart	ENSSSAG00000047920	ENSSSAT00000074128	mrpl37	-0.485095	0.148877	8.75e-05	0.009967
Heart	ENSSSAG00000078114	ENSSSAT00000149466	nup98	-0.484877	0.105324	3.8e-07	0.000201757
Heart	ENSSSAG00000009074	ENSSSAT00000019983	HDDC3	-0.484386	0.17082	0.000332454	0.0210406
Heart	ENSSSAG00000041502	ENSSSAT00000059634	nolc1	-0.482878	0.168732	0.000307806	0.0200836
Heart	ENSSSAG00000009186	ENSSSAT00000020180	yars2	-0.481377	0.141424	5.49e-05	0.00742863
Heart	ENSSSAG00000010383	ENSSSAT00000022855	BTBD7	-0.478904	0.086454	2.9e-09	2.81e-06
Heart	ENSSSAG00000042221	ENSSSAT00000221742	acox1	-0.477484	0.172491	0.000414879	0.0241128
Heart	ENSSSAG00000045678	ENSSSAT00000069175	mix23	-0.473969	0.18086	0.000630552	0.0315146
Heart	ENSSSAG00000048431	ENSSSAT00000080898	agtpbp1	-0.473339	0.192896	0.000977264	0.0413835
Heart	ENSSSAG00000069298	ENSSSAT00000120195	NADK2	-0.47247	0.156587	0.000198884	0.0158424
Heart	ENSSSAG00000048688	ENSSSAT00000076214		-0.471924	0.155137	0.000181951	0.0151962
Heart	ENSSSAG00000100885	ENSSSAT00000239505	dnlz	-0.47114	0.182061	0.0006907	0.0333713
Heart	ENSSSAG00000073570	ENSSSAT00000132106	mtif2	-0.471136	0.133976	3.72e-05	0.00589501
Heart	ENSSSAG00000085165	ENSSSAT00000217059	ptgesl	-0.46938	0.148838	0.000126372	0.0121708
Heart	ENSSSAG00000009873	ENSSSAT00000021812	DGLUCY	-0.467485	0.11238	2.84e-06	0.00100556
Heart	ENSSSAG00000054675	ENSSSAT00000087345	RT31	-0.465064	0.160119	0.000308644	0.0200836
Heart	ENSSSAG00000047766	ENSSSAT00000074478	ambra1b	-0.462968	0.104507	8.8e-07	0.000372125
Heart	ENSSSAG00000104856	ENSSSAT00000249318	EHBP1	-0.461415	0.129081	3.05e-05	0.00515403
Heart	ENSSSAG00000045556	ENSSSAT00000068802	cpeb4a	-0.461331	0.180823	0.000787794	0.0362136
Heart	ENSSSAG00000047895	ENSSSAT00000242669	samm50l	-0.458581	0.192248	0.00105582	0.0434372
Heart	ENSSSAG00000056882	ENSSSAT00000092924	akap1b	-0.457355	0.18545	0.000962483	0.0409995
Heart	ENSSSAG00000081066	ENSSSAT00000154501	gapvd1	-0.456519	0.140949	9.64e-05	0.0105965
Heart	ENSSSAG00000093826	ENSSSAT00000220397		-0.456493	0.154944	0.000253082	0.0181502
Heart	ENSSSAG00000062197	ENSSSAT00000101836	pgk	-0.455733	0.173836	0.000648238	0.0320169
Heart	ENSSSAG00000070946	ENSSSAT00000125093		-0.455701	0.149701	0.000194431	0.0157339
Heart	ENSSSAG00000100835	ENSSSAT00000238057	mrpl17	-0.452448	0.159494	0.000354245	0.0217811
Heart	ENSSSAG00000063047	ENSSSAT00000103224		-0.452096	0.108651	3.04e-06	0.00105777
Heart	ENSSSAG00000045173	ENSSSAT00000086468	ap1b1	-0.450399	0.151879	0.000251754	0.0181188
Heart	ENSSSAG00000042097	ENSSSAT00000061367		-0.447622	0.181015	0.00109376	0.0445404
Heart	ENSSSAG00000059140	ENSSSAT00000162606	cand1	-0.445991	0.182185	0.00108151	0.0442484
Heart	ENSSSAG00000075434	ENSSSAT00000138750	mical3a	-0.445185	0.186586	0.00126301	0.048712
Heart	ENSSSAG00000053115	ENSSSAT00000083888	tax1bp1a	-0.444472	0.133216	7.7e-05	0.00944407
Heart	ENSSSAG00000015852	ENSSSAT00000031128		-0.442151	0.182323	0.00115624	0.0460084
Heart	ENSSSAG00000056079	ENSSSAT00000090816	cenpq	-0.441679	0.163913	0.000559568	0.0292827
Heart	ENSSSAG00000041395	ENSSSAT00000059528		-0.441024	0.130959	6.92e-05	0.00869786
Heart	ENSSSAG00000109221	ENSSSAT00000212394	ccng1	-0.439263	0.136347	0.000118824	0.0118538
Heart	ENSSSAG00000056390	ENSSSAT00000091544	TMEM69	-0.43647	0.153033	0.000370475	0.02236
Heart	ENSSSAG00000080678	ENSSSAT00000153393		-0.435068	0.159796	0.000532296	0.0283622
Heart	ENSSSAG00000097766	ENSSSAT00000238750		-0.434416	0.168163	0.000796591	0.0363874
Heart	ENSSSAG00000066027	ENSSSAT00000174602		-0.434089	0.165105	0.00070301	0.0337042
Heart	ENSSSAG00000119216	ENSSSAT00000204320		-0.432889	0.114237	1.38e-05	0.00301517
Heart	ENSSSAG00000071539	ENSSSAT00000140526		-0.432699	0.179128	0.00122175	0.0475675
Heart	ENSSSAG00000105306	ENSSSAT00000204070	TIM8A	-0.431791	0.172719	0.00098512	0.0415948
Heart	ENSSSAG00000045815	ENSSSAT00000069509	RT07	-0.430969	0.128943	7.83e-05	0.00944407
Heart	ENSSSAG00000047894	ENSSSAT00000077350	EIF4G1	-0.430889	0.178796	0.00125618	0.0485649
Heart	ENSSSAG00000049708	ENSSSAT00000078005	zgc:91944	-0.428656	0.175254	0.00119007	0.0468833
Heart	ENSSSAG00000075012	ENSSSAT00000136490	lis1a	-0.427144	0.12908	8.8e-05	0.00997475
Heart	ENSSSAG00000085392	ENSSSAT00000196335	hccsb	-0.427086	0.175719	0.00115842	0.0460534
Heart	ENSSSAG00000105744	ENSSSAT00000205856		-0.425714	0.149003	0.000388073	0.0231419
Heart	ENSSSAG00000005924	ENSSSAT00000012812	oxa1l	-0.425069	0.168703	0.000957156	0.0408499
Heart	ENSSSAG00000079517	ENSSSAT00000150334	kif1b	-0.424592	0.167668	0.000942984	0.0404845
Heart	ENSSSAG00000058624	ENSSSAT00000096662	mylk3	-0.66608	0.130999	2.36e-08	1.74e-05	x
Heart	ENSSSAG00000010304	ENSSSAT00000059513		-0.422562	0.106196	7.45e-06	0.00199474
Heart	ENSSSAG00000106548	ENSSSAT00000223573		-0.421974	0.174701	0.00126334	0.048712
Heart	ENSSSAG00000063808	ENSSSAT00000014911	HELZ	-0.421134	0.123256	5.87e-05	0.00770134
Heart	ENSSSAG00000091938	ENSSSAT00000196999		-0.420867	0.17473	0.00130278	0.0499672
Heart	ENSSSAG00000107579	ENSSSAT00000212131		-0.411787	0.118868	5.66e-05	0.00749451
Heart	ENSSSAG00000053878	ENSSSAT00000085537	tmem147	-0.410636	0.108056	1.51e-05	0.00317176
Heart	ENSSSAG00000077617	ENSSSAT00000144129		-0.407644	0.148179	0.000556369	0.0292827
Heart	ENSSSAG00000055355	ENSSSAT00000225122		-0.406343	0.145262	0.000480929	0.0264995
Heart	ENSSSAG00000062498	ENSSSAT00000102167	mfsd2b	-0.405958	0.166765	0.00129762	0.049813
Heart	ENSSSAG00000072705	ENSSSAT00000129731	aifm1	-0.405461	0.154153	0.000742442	0.0350542
Heart	ENSSSAG00000080505	ENSSSAT00000152866		-0.40445	0.1045	1.53e-05	0.00317899
Heart	ENSSSAG00000100810	ENSSSAT00000236373	MTFMT	-0.403689	0.147192	0.000566948	0.0295137
Heart	ENSSSAG00000006610	ENSSSAT00000189937	mrpl38	-0.402563	0.0750363	9.68e-09	8.26e-06
Heart	ENSSSAG00000006213	ENSSSAT00000014251		-0.401448	0.162322	0.00120436	0.0471478
Heart	ENSSSAG00000010221	ENSSSAT00000023045		-0.401365	0.129164	0.00019148	0.0156682
Heart	ENSSSAG00000052723	ENSSSAT00000083280		-0.396267	0.158658	0.00111632	0.0449543
Heart	ENSSSAG00000057946	ENSSSAT00000095042	uqcrc2b	-0.395598	0.157536	0.00111081	0.0449139
Heart	ENSSSAG00000111558	ENSSSAT00000182974	khsrp	-0.395395	0.10207	1.2e-05	0.00277741
Heart	ENSSSAG00000061783	ENSSSAT00000127472	erbin	-0.393034	0.143669	0.000603897	0.0306388
Heart	ENSSSAG00000050867	ENSSSAT00000011789		-0.390493	0.139426	0.000514684	0.0276267
Heart	ENSSSAG00000073121	ENSSSAT00000134735	loxl2b	-0.388562	0.125839	0.000216437	0.0166171
Heart	ENSSSAG00000001599	ENSSSAT00000003365	fus	-0.388211	0.153806	0.00111013	0.0449139
Heart	ENSSSAG00000041840	ENSSSAT00000060340		-0.378885	0.150569	0.00113126	0.0454016
Heart	ENSSSAG00000099532	ENSSSAT00000222064	yipf2	-0.375898	0.132161	0.000466223	0.0260171
Heart	ENSSSAG00000051545	ENSSSAT00000080783		-0.373004	0.118637	0.00019268	0.0157074
Heart	ENSSSAG00000009267	ENSSSAT00000020394	RT35	-0.370747	0.118075	0.000197825	0.0158139
Heart	ENSSSAG00000079454	ENSSSAT00000208747	pex14	-0.370276	0.127102	0.000395783	0.0235051
Heart	ENSSSAG00000007259	ENSSSAT00000015824	mtx2	-0.36911	0.100572	3.3e-05	0.00543138
Heart	ENSSSAG00000008141	ENSSSAT00000204710	agla	-0.364538	0.126907	0.000446348	0.0252577
Heart	ENSSSAG00000009664	ENSSSAT00000021204	mtpn	-0.361452	0.101816	5.64e-05	0.00749451
Heart	ENSSSAG00000109063	ENSSSAT00000191612	mrpl32	-0.359062	0.138237	0.00104814	0.043208
Heart	ENSSSAG00000065146	ENSSSAT00000115040	DHX36	-0.358473	0.119927	0.000336998	0.0211082
Heart	ENSSSAG00000090887	ENSSSAT00000241271		-0.357854	0.132711	0.000805493	0.0366402
Heart	ENSSSAG00000069487	ENSSSAT00000120724	coq5	-0.356902	0.122144	0.00042026	0.0243213
Heart	ENSSSAG00000120388	ENSSSAT00000239303	ppp1r37	-0.353869	0.12539	0.000574558	0.0296616
Heart	ENSSSAG00000116318	ENSSSAT00000184587		-0.34477	0.125318	0.000776504	0.035913
Heart	ENSSSAG00000067730	ENSSSAT00000115848	casd1	-0.34473	0.124317	0.000694484	0.0334428
Heart	ENSSSAG00000067160	ENSSSAT00000120142		-0.342761	0.0808672	5.03e-06	0.00150925
Heart	ENSSSAG00000011597	ENSSSAT00000024626	ppan	-0.342686	0.120488	0.000502735	0.0271864
Heart	ENSSSAG00000084385	ENSSSAT00000209360	si:ch211-215a10.4	-0.339948	0.108905	0.000239082	0.0175075
Heart	ENSSSAG00000116765	ENSSSAT00000239213		-0.337452	0.128953	0.00111276	0.0449139
Heart	ENSSSAG00000053554	ENSSSAT00000084712	ca163	-0.335325	0.121851	0.000766334	0.035593
Heart	ENSSSAG00000118708	ENSSSAT00000015398	nsfl1c	-0.323606	0.119613	0.000936248	0.0403697
Heart	ENSSSAG00000015815	ENSSSAT00000131659		-0.314225	0.117107	0.00105866	0.0434769
Heart	ENSSSAG00000093389	ENSSSAT00000001458	smg1	-0.305552	0.0701051	2.43e-06	0.000872453
Heart	ENSSSAG00000063396	ENSSSAT00000104360	exoc3	-0.301921	0.0989835	0.00048726	0.0266475
Heart	ENSSSAG00000065671	ENSSSAT00000110149	DDB1	-0.286703	0.0943745	0.000428099	0.0246182
Heart	ENSSSAG00000003854	ENSSSAT00000078067		-0.284898	0.101167	0.000906958	0.0396005
Heart	ENSSSAG00000081424	ENSSSAT00000155559		-0.170768	0.0500664	0.000294733	0.0197086
Heart	ENSSSAG00000008532	ENSSSAT00000234371		-0.137826	0.264298	0.000559082	0.0292827
Heart	ENSSSAG00000073280	ENSSSAT00000131341	klf15	-0.137448	0.264497	0.000352899	0.021774
Heart	ENSSSAG00000002637	ENSSSAT00000205550		-0.128159	0.247609	0.000168031	0.0144682
Heart	ENSSSAG00000099623	ENSSSAT00000241265	fkbp5	-0.103988	0.207303	0.000414877	0.0241128
Heart	ENSSSAG00000078313	ENSSSAT00000146181		-0.0951869	0.199119	1.17e-05	0.00274266
Heart	ENSSSAG00000077831	ENSSSAT00000147357	atp2a2	-0.0803819	0.184172	2.09e-05	0.00395292
Heart	ENSSSAG00000081392	ENSSSAT00000155438	IPO4	-0.0537239	0.163798	6.47e-05	0.00827914
Heart	ENSSSAG00000077274	ENSSSAT00000143062		-0.0533072	0.163872	1.88e-06	0.000731666
Heart	ENSSSAG00000104646	ENSSSAT00000182038	tppp3	-0.0448938	0.159117	0.000981117	0.0415063
Heart	ENSSSAG00000056753	ENSSSAT00000092408		-0.044425	0.158873	0.000737033	0.0349124
Heart	ENSSSAG00000112871	ENSSSAT00000222986		-0.044418	0.158938	0.00103175	0.0428569
Heart	ENSSSAG00000056466	ENSSSAT00000091784		-0.0437123	0.15928	0.000867591	0.0385781
Heart	ENSSSAG00000042664	ENSSSAT00000062763	gys1	-0.0419475	0.158404	1.85e-07	0.000113215
Heart	ENSSSAG00000079012	ENSSSAT00000172812	CASK	-0.0419276	0.157852	0.000471391	0.0261583
Heart	ENSSSAG00000081432	ENSSSAT00000155588	hspd1	-0.0418086	0.158372	0.000531902	0.0283622
Heart	ENSSSAG00000076008	ENSSSAT00000144239		-0.0401489	0.15717	0.000260051	0.0184674
Heart	ENSSSAG00000111958	ENSSSAT00000198709		-0.0399084	0.157961	1.38e-08	1.11e-05
Heart	ENSSSAG00000104044	ENSSSAT00000158633	gnb5b	-0.038907	0.157176	0.000815697	0.0369116
Heart	ENSSSAG00000047782	ENSSSAT00000074337		-0.0382279	0.156368	0.000410299	0.0239747
Heart	ENSSSAG00000109074	ENSSSAT00000140875	map2k4b	-0.0381435	0.156483	0.000213234	0.0165169
Heart	ENSSSAG00000048397	ENSSSAT00000128615		-0.0379743	0.157186	2.23e-08	1.7e-05
Heart	ENSSSAG00000080995	ENSSSAT00000154318		-0.0373711	0.156958	2.76e-09	2.79e-06
Heart	ENSSSAG00000073509	ENSSSAT00000184381		-0.0371719	0.15674	6.3e-05	0.00814328
Heart	ENSSSAG00000074980	ENSSSAT00000137656	MVP	-0.0362349	0.155933	0.000114485	0.0115632
Heart	ENSSSAG00000044360	ENSSSAT00000066200	sqor	-0.0347113	0.155975	8.57e-11	1.13e-07
Heart	ENSSSAG00000103327	ENSSSAT00000212537		-0.034051	0.155737	2.07e-09	2.26e-06
Heart	ENSSSAG00000065320	ENSSSAT00000109356	ambra1b	-0.0334172	0.155057	0.000636642	0.0315294
Heart	ENSSSAG00000105864	ENSSSAT00000162485		-0.0332815	0.154659	0.000587289	0.0300775
Heart	ENSSSAG00000095162	ENSSSAT00000205594	slc25a10b	-0.0326926	0.154906	0.00017653	0.014864
Heart	ENSSSAG00000090080	ENSSSAT00000185793		-0.0325603	0.154537	0.000794179	0.0363648
Heart	ENSSSAG00000080013	ENSSSAT00000151190		-0.0306165	0.153914	0.000307296	0.0200836
Heart	ENSSSAG00000009990	ENSSSAT00000021982	ATP6V0A1	-0.0299942	0.153925	0.000932938	0.0403303
Heart	ENSSSAG00000114836	ENSSSAT00000180861		-0.0299683	0.153728	0.000194903	0.0157339
Heart	ENSSSAG00000085087	ENSSSAT00000012077		-0.0295549	0.153914	0.00010842	0.0111842
Heart	ENSSSAG00000098238	ENSSSAT00000212463		-0.0293314	0.153663	2.09e-05	0.00395292
Heart	ENSSSAG00000004112	ENSSSAT00000202240	scpep1	-0.0288871	0.153348	0.00104971	0.0432317
Heart	ENSSSAG00000062962	ENSSSAT00000223715		-0.0288262	0.153468	9.86e-05	0.0106744
Heart	ENSSSAG00000045995	ENSSSAT00000082830		-0.0284849	0.153946	6.89e-08	4.54e-05
Heart	ENSSSAG00000097554	ENSSSAT00000196877		-0.0270892	0.153158	0.000425182	0.0245153
Heart	ENSSSAG00000068527	ENSSSAT00000118508	dnmt3ab	-0.0268371	0.152761	0.0011357	0.0454824
Heart	ENSSSAG00000089632	ENSSSAT00000220696	chpt1	-0.0263455	0.152714	0.000367614	0.0222573
Heart	ENSSSAG00000041335	ENSSSAT00000076765		-0.0262681	0.152705	0.000259521	0.0184599
Heart	ENSSSAG00000080203	ENSSSAT00000113060	calr	-0.0260438	0.152735	3.83e-05	0.00600855
Heart	ENSSSAG00000074278	ENSSSAT00000134211	dnajb5	-0.0248429	0.152544	0.000906718	0.0396005
Heart	ENSSSAG00000095315	ENSSSAT00000225004		-0.0247684	0.152332	0.000160761	0.0140958
Heart	ENSSSAG00000045875	ENSSSAT00000069634		-0.0246306	0.152731	0.000370852	0.02236
Heart	ENSSSAG00000077469	ENSSSAT00000239149	angpt1	-0.0235565	0.152326	0.00032368	0.0207212
Heart	ENSSSAG00000076960	ENSSSAT00000112112	kpna4	-0.0232714	0.152244	0.000207876	0.0163398
Heart	ENSSSAG00000053807	ENSSSAT00000085971	GCN1	-0.022451	0.151847	8.28e-05	0.00975347
Heart	ENSSSAG00000009988	ENSSSAT00000022305		-0.022185	0.151995	0.000353364	0.021774
Heart	ENSSSAG00000009157	ENSSSAT00000072565	ncor1	-0.0220963	0.151817	2.2e-05	0.00412874
Heart	ENSSSAG00000078476	ENSSSAT00000150525	FGR	-0.0216354	0.151671	0.000213106	0.0165169
Heart	ENSSSAG00000068006	ENSSSAT00000123490		-0.0213434	0.151686	1.51e-05	0.00317176
Heart	ENSSSAG00000007822	ENSSSAT00000017531		-0.0212558	0.151612	0.000117976	0.0118062
Heart	ENSSSAG00000057994	ENSSSAT00000095986	pfkfb3	-0.0211528	0.152062	0.000652513	0.0321326
Heart	ENSSSAG00000046354	ENSSSAT00000072344	thop1	-0.020254	0.151362	0.000585831	0.0300381
Heart	ENSSSAG00000003665	ENSSSAT00000009290		-0.0200504	0.151673	0.000876382	0.0388104
Heart	ENSSSAG00000039991	ENSSSAT00000061735	MAST4	-0.0195614	0.151588	0.000697256	0.0335392
Heart	ENSSSAG00000090160	ENSSSAT00000151575		-0.019338	0.151374	0.00126035	0.048683
Heart	ENSSSAG00000000891	ENSSSAT00000151728	pdha1a	-0.0188531	0.15145	0.000755306	0.0354578
Heart	ENSSSAG00000007711	ENSSSAT00000017042	birc2	-0.0188396	0.151516	0.000541937	0.0287233
Heart	ENSSSAG00000004750	ENSSSAT00000010185		-0.0182099	0.151175	0.000588166	0.030087
Heart	ENSSSAG00000057456	ENSSSAT00000191189	klhl4	-0.0170233	0.150834	7.73e-05	0.00944407
Heart	ENSSSAG00000111022	ENSSSAT00000191442		-0.0165495	0.151049	0.0008003	0.0364803
Heart	ENSSSAG00000007137	ENSSSAT00000015439	cox4i2	-0.0163255	0.151189	1.45e-05	0.00314149
Heart	ENSSSAG00000038733	ENSSSAT00000228904		-0.0160808	0.150802	0.000966337	0.0410939
Heart	ENSSSAG00000085214	ENSSSAT00000176335	dusp14	-0.0157613	0.150755	0.00103824	0.0429691
Heart	ENSSSAG00000006594	ENSSSAT00000014073	tsc22d2	-0.0156267	0.150902	0.00060599	0.0306388
Heart	ENSSSAG00000007643	ENSSSAT00000167071	metap1	-0.0151869	0.150711	0.000321457	0.0206883
Heart	ENSSSAG00000005331	ENSSSAT00000014593		-0.0151132	0.151	8.43e-06	0.00215881
Heart	ENSSSAG00000073534	ENSSSAT00000132068		-0.0148733	0.15096	0.000116362	0.0116986
Heart	ENSSSAG00000047867	ENSSSAT00000239179		-0.0145265	0.150911	3e-05	0.00510781
Heart	ENSSSAG00000047582	ENSSSAT00000087579	plxnb2b	-0.0143916	0.150892	4.02e-05	0.00616621
Heart	ENSSSAG00000044871	ENSSSAT00000112034		-0.0143664	0.150887	0.00010162	0.010816
Heart	ENSSSAG00000042468	ENSSSAT00000240961	ppa6	-0.01436	0.150886	8.52e-05	0.00981614
Heart	ENSSSAG00000057702	ENSSSAT00000187103	focad	-0.0140729	0.150845	0.000114121	0.0115533
Heart	ENSSSAG00000056533	ENSSSAT00000096907		-0.0135021	0.150767	2.96e-05	0.00507401
Heart	ENSSSAG00000003483	ENSSSAT00000008655	pkd2	-0.013376	0.150314	0.000439997	0.0250378
Heart	ENSSSAG00000016068	ENSSSAT00000029903	LIMCH1	-0.0127327	0.150267	0.000284397	0.0193746
Heart	ENSSSAG00000064751	ENSSSAT00000121560	agps	-0.0124904	0.150618	0.00120719	0.0472067
Heart	ENSSSAG00000069267	ENSSSAT00000139014		-0.00943792	0.150027	0.000868816	0.0385932
Heart	ENSSSAG00000007798	ENSSSAT00000221349		-0.00823435	0.150193	1.94e-18	1.2e-14
Heart	ENSSSAG00000065313	ENSSSAT00000109230	mylk3	1.21856	0.464762	0.000298169	0.0197864	x
Heart	ENSSSAG00000048090	ENSSSAT00000238258	lims2	-0.00779661	0.150158	5.63e-18	2.72e-14
Heart	ENSSSAG00000003244	ENSSSAT00000159181		-0.00778801	0.150158	8.51e-17	2.85e-13
Heart	ENSSSAG00000063595	ENSSSAT00000246369		-0.00778685	0.150157	7.85e-16	1.55e-12
Heart	ENSSSAG00000020652	ENSSSAT00000039233		-0.00778122	0.150157	2.48e-15	4.32e-12
Heart	ENSSSAG00000002696	ENSSSAT00000005725		-0.00776034	0.150154	2.12e-15	3.85e-12
Heart	ENSSSAG00000068733	ENSSSAT00000054852	SFR11	0.00798103	0.150169	1.27e-14	1.98e-11
Heart	ENSSSAG00000067809	ENSSSAT00000119212	col1a2	0.0080054	0.150171	1.48e-18	1.07e-14
Heart	ENSSSAG00000045482	ENSSSAT00000070986	efemp2a	0.00801309	0.150172	1.14e-14	1.84e-11
Heart	ENSSSAG00000078243	ENSSSAT00000145991	gtpbp2	0.00805864	0.150176	3e-17	1.19e-13
Heart	ENSSSAG00000062901	ENSSSAT00000104488	tnksb	0.00806638	0.150176	3.17e-16	7.76e-13
Heart	ENSSSAG00000056659	ENSSSAT00000078143		0.0080672	0.150176	1.65e-15	3.11e-12
Heart	ENSSSAG00000006906	ENSSSAT00000183191		0.00807264	0.150177	6.94e-16	1.44e-12
Heart	ENSSSAG00000109064	ENSSSAT00000140333	dip2ba	0.00807368	0.150177	2.8e-15	4.69e-12
Heart	ENSSSAG00000038579	ENSSSAT00000059557		0.00807565	0.150177	2.94e-17	1.19e-13
Heart	ENSSSAG00000092979	ENSSSAT00000216666	acads	0.00807759	0.150177	6.79e-16	1.44e-12
Heart	ENSSSAG00000069070	ENSSSAT00000122871	sep7	0.0081156	0.15018	3.37e-16	7.76e-13
Heart	ENSSSAG00000103129	ENSSSAT00000055597	pdlim7	-0.842226	0.316518	0.000318392	0.0206254	x
Heart	ENSSSAG00000067447	ENSSSAT00000124070	crata	0.00812821	0.150182	1.02e-16	3.06e-13
Heart	ENSSSAG00000067447	ENSSSAT00000123876	crata	0.00813252	0.150182	1.05e-16	3.06e-13
Heart	ENSSSAG00000066270	ENSSSAT00000115880	bmpr1aa	0.00819732	0.150187	3.38e-16	7.76e-13
Heart	ENSSSAG00000030661	ENSSSAT00000235439	AATM	0.00829171	0.150195	5.69e-17	2.07e-13
Heart	ENSSSAG00000103129	ENSSSAT00000055521	pdlim7	-0.579605	0.215306	0.000397987	0.0235717	x
Heart	ENSSSAG00000068729	ENSSSAT00000121380		0.00855407	0.150217	0.000133609	0.0125894
Heart	ENSSSAG00000079289	ENSSSAT00000149278	pygma	0.0086487	0.150224	5.11e-05	0.00714967
Heart	ENSSSAG00000008380	ENSSSAT00000062457	lamc1	0.00884101	0.150242	0.000124753	0.0120416
Heart	ENSSSAG00000079145	ENSSSAT00000013857	PLXND1	0.00997065	0.150301	0.0010174	0.0424228
Heart	ENSSSAG00000067811	ENSSSAT00000116284	ripor1	0.0136083	0.150778	0.000120799	0.0119056
Heart	ENSSSAG00000087514	ENSSSAT00000164257		0.0146995	0.150933	2.81e-05	0.00487426
Heart	ENSSSAG00000065807	ENSSSAT00000111057		0.0147364	0.150939	9.83e-06	0.00244822
Heart	ENSSSAG00000096182	ENSSSAT00000209473	rhoga	0.014816	0.150947	0.000105848	0.0110471
Heart	ENSSSAG00000114732	ENSSSAT00000190271	NADK	0.0153706	0.150736	0.000651125	0.0321005
Heart	ENSSSAG00000044360	ENSSSAT00000066238	sqor	0.0155236	0.150904	0.000343503	0.0214385
Heart	ENSSSAG00000058700	ENSSSAT00000204170		0.0155276	0.150957	0.000837304	0.0377324
Heart	ENSSSAG00000006479	ENSSSAT00000015094	APP	0.0170273	0.151297	8.49e-05	0.00981614
Heart	ENSSSAG00000065862	ENSSSAT00000110666	cdc14b	0.01716	0.151258	0.000321185	0.0206883
Heart	ENSSSAG00000098888	ENSSSAT00000188371		0.0176248	0.15135	0.000922712	0.0400119
Heart	ENSSSAG00000103526	ENSSSAT00000177891	pdzrn3b	0.0207569	0.151695	0.000232288	0.017139
Heart	ENSSSAG00000012871	ENSSSAT00000026461		0.0208126	0.15168	0.000609607	0.0307502
Heart	ENSSSAG00000006565	ENSSSAT00000195105	rnf13	0.0211607	0.151815	0.00012143	0.0119056
Heart	ENSSSAG00000061598	ENSSSAT00000101629	ndfip1	0.0222471	0.152237	5.35e-05	0.00736865
Heart	ENSSSAG00000117122	ENSSSAT00000220951	rab6ba	0.0230696	0.152203	0.000388068	0.0231419
Heart	ENSSSAG00000086305	ENSSSAT00000084423		0.0232503	0.152202	0.000634186	0.0315294
Heart	ENSSSAG00000116233	ENSSSAT00000228201		0.0242221	0.152704	8.31e-05	0.00975347
Heart	ENSSSAG00000068062	ENSSSAT00000175731	TNPO1	0.0242447	0.152203	0.000362506	0.0220093
Heart	ENSSSAG00000001126	ENSSSAT00000129772		0.0279699	0.153086	0.000656169	0.0322397
Heart	ENSSSAG00000083255	ENSSSAT00000190953		0.0310986	0.15439	0.000484107	0.0265752
Heart	ENSSSAG00000047126	ENSSSAT00000073909		0.0311138	0.15408	0.000143103	0.0131982
Heart	ENSSSAG00000101678	ENSSSAT00000192420	dnajb9a	0.0315146	0.15424	7.88e-05	0.00946797
Heart	ENSSSAG00000121644	ENSSSAT00000240441	nt5c1aa	0.0315253	0.154493	0.000433502	0.0247654
Heart	ENSSSAG00000049782	ENSSSAT00000081191	znf277	0.0335543	0.155222	3.84e-05	0.00600855
Heart	ENSSSAG00000067857	ENSSSAT00000140414	pfkmb	-0.00796428	0.150172	3.96e-18	2.16e-14	x
Heart	ENSSSAG00000101893	ENSSSAT00000247124		0.0600711	0.166972	0.000848156	0.0380246
Heart	ENSSSAG00000007968	ENSSSAT00000017699	cnbpa	0.140347	0.041148	0.000333037	0.0210406
Heart	ENSSSAG00000045872	ENSSSAT00000069605	vhl	0.204561	0.0689613	0.00103938	0.0429691
Heart	ENSSSAG00000064172	ENSSSAT00000106175	TAF10	0.209832	0.0667928	0.000559611	0.0292827
Heart	ENSSSAG00000092011	ENSSSAT00000228872		0.213803	0.0665518	0.000446145	0.0252577
Heart	ENSSSAG00000047369	ENSSSAT00000073045	sumo1	0.236282	0.0659491	9.78e-05	0.0106594
Heart	ENSSSAG00000004766	ENSSSAT00000010212		0.241402	0.078967	0.000598412	0.0305393
Heart	ENSSSAG00000088379	ENSSSAT00000202703		0.241817	0.0649215	5.26e-05	0.00726272
Heart	ENSSSAG00000061574	ENSSSAT00000218066	sp3a	0.242819	0.0768186	0.000498097	0.0271039
Heart	ENSSSAG00000003765	ENSSSAT00000217846		0.253369	0.0753951	0.000187098	0.0154549
Heart	ENSSSAG00000057098	ENSSSAT00000093053		0.259943	0.0938094	0.00117922	0.0466671
Heart	ENSSSAG00000063050	ENSSSAT00000242770	eloa	0.260636	0.0923019	0.000999058	0.0417781
Heart	ENSSSAG00000120722	ENSSSAT00000071027	RL17	0.261385	0.0868325	0.000575762	0.0296616
Heart	ENSSSAG00000058310	ENSSSAT00000095448	cnot8	0.267235	0.0911058	0.000693759	0.0334428
Heart	ENSSSAG00000090373	ENSSSAT00000207398		0.267799	0.0952719	0.00102038	0.0424657
Heart	ENSSSAG00000077632	ENSSSAT00000144199	rpl8	0.268008	0.0875617	0.000458438	0.0257628
Heart	ENSSSAG00000040847	ENSSSAT00000058088	cf166	0.268555	0.0756806	8.38e-05	0.00975347
Heart	ENSSSAG00000046930	ENSSSAT00000074307		0.269426	0.0941359	0.000863826	0.03845
Heart	ENSSSAG00000096304	ENSSSAT00000229520		0.270182	0.0956771	0.000937094	0.0403697
Heart	ENSSSAG00000108819	ENSSSAT00000225178	zgc:153990	0.271596	0.0894602	0.000485126	0.0265933
Heart	ENSSSAG00000076506	ENSSSAT00000060905	rps7	0.271673	0.0861387	0.000329852	0.0209929
Heart	ENSSSAG00000079593	ENSSSAT00000149995	atg13	0.276188	0.0959521	0.000764629	0.035593
Heart	ENSSSAG00000074636	ENSSSAT00000135375	wtap	0.28269	0.0932997	0.000459342	0.0257681
Heart	ENSSSAG00000052007	ENSSSAT00000166251	RPS3A	0.283064	0.093115	0.000458655	0.0257628
Heart	ENSSSAG00000068519	ENSSSAT00000244053		0.284732	0.0852454	0.000164557	0.0143108
Heart	ENSSSAG00000082013	ENSSSAT00000219556		0.286652	0.106009	0.00118787	0.0468389
Heart	ENSSSAG00000078018	ENSSSAT00000145290	RPS25	0.287564	0.10231	0.000794425	0.0363648
Heart	ENSSSAG00000108704	ENSSSAT00000228415	rab3db	0.28912	0.0824684	8.62e-05	0.00990625
Heart	ENSSSAG00000055320	ENSSSAT00000203320	gpatch2l	0.28978	0.101629	0.000759671	0.0354828
Heart	ENSSSAG00000044191	ENSSSAT00000065768		0.290431	0.0712859	9.92e-06	0.00245254
Heart	ENSSSAG00000080463	ENSSSAT00000152573	ndufaf3	0.290476	0.100865	0.000709387	0.0339359
Heart	ENSSSAG00000087271	ENSSSAT00000231672	rpl32	0.291596	0.0873792	0.000155591	0.0138335
Heart	ENSSSAG00000065665	ENSSSAT00000110136	RPS25	0.293112	0.106778	0.00104496	0.0431179
Heart	ENSSSAG00000063394	ENSSSAT00000104124	CYB5	0.29589	0.0804567	4.36e-05	0.00643437
Heart	ENSSSAG00000086381	ENSSSAT00000217395		0.296972	0.104015	0.000752632	0.0353818
Heart	ENSSSAG00000107958	ENSSSAT00000115820	RS17	0.296977	0.0887223	0.000145199	0.013279
Heart	ENSSSAG00000070637	ENSSSAT00000160927	rpl22	0.297391	0.104441	0.000739151	0.0349747
Heart	ENSSSAG00000046371	ENSSSAT00000070847	rpl6	0.297924	0.101137	0.000851367	0.0380654
Heart	ENSSSAG00000002926	ENSSSAT00000006268	EIF1B	0.298219	0.0943969	0.000269064	0.0188008
Heart	ENSSSAG00000060203	ENSSSAT00000098877	rl21	0.299628	0.0931462	0.000222064	0.0169244
Heart	ENSSSAG00000076350	ENSSSAT00000140255	CF064	0.299734	0.0971443	0.000346436	0.0215443
Heart	ENSSSAG00000069593	ENSSSAT00000121013	RPS3A	0.303263	0.100841	0.000427906	0.0246182
Heart	ENSSSAG00000067926	ENSSSAT00000071486	rpl19	0.303358	0.0928923	0.000225609	0.0169244
Heart	ENSSSAG00000057006	ENSSSAT00000092893	rpl31	0.303458	0.0715953	4.58e-06	0.00143459
Heart	ENSSSAG00000071484	ENSSSAT00000126101	psd7	0.306198	0.0771688	1.35e-05	0.00299474
Heart	ENSSSAG00000003176	ENSSSAT00000006835	rpl13a	0.30668	0.0902439	9.8e-05	0.0106594
Heart	ENSSSAG00000072689	ENSSSAT00000129596	vma21	0.307267	0.100684	0.000373241	0.0224419
Heart	ENSSSAG00000074553	ENSSSAT00000085787	rps24	0.30813	0.0976686	0.000264737	0.0185712
Heart	ENSSSAG00000073308	ENSSSAT00000131420		0.30821	0.0988872	0.000293578	0.0196616
Heart	ENSSSAG00000076849	ENSSSAT00000141731		0.310139	0.109812	0.000648693	0.0320169
Heart	ENSSSAG00000014980	ENSSSAT00000028002	rp9	0.310141	0.116476	0.00114166	0.0456791
Heart	ENSSSAG00000078918	ENSSSAT00000147940	tbca	0.310508	0.0852454	4.9e-05	0.00699541
Heart	ENSSSAG00000105393	ENSSSAT00000209099		0.312513	0.0918332	0.00012134	0.0119056
Heart	ENSSSAG00000077570	ENSSSAT00000143995	snrnp27	0.313208	0.0809814	1.93e-05	0.00372004
Heart	ENSSSAG00000110093	ENSSSAT00000201695	TMM93	0.314	0.114354	0.000891574	0.0391645
Heart	ENSSSAG00000069505	ENSSSAT00000120771		0.315002	0.0855649	3.69e-05	0.00589501
Heart	ENSSSAG00000040446	ENSSSAT00000014134		0.315435	0.093718	0.000119094	0.0118538
Heart	ENSSSAG00000093700	ENSSSAT00000124757		0.315601	0.0894217	6.97e-05	0.00871404
Heart	ENSSSAG00000067618	ENSSSAT00000115531	riok2	0.31633	0.113537	0.00077853	0.0359395
Heart	ENSSSAG00000005944	ENSSSAT00000012855		0.316945	0.0931248	0.000104901	0.0110037
Heart	ENSSSAG00000113417	ENSSSAT00000171128	rxrbb	0.317614	0.11547	0.000838937	0.0377669
Heart	ENSSSAG00000077613	ENSSSAT00000144128	zgc:92907	0.318853	0.0874284	4.23e-05	0.00634965
Heart	ENSSSAG00000075809	ENSSSAT00000138643		0.321988	0.106192	0.000349176	0.0216197
Heart	ENSSSAG00000046230	ENSSSAT00000070520		0.322107	0.079391	7.95e-06	0.00207121
Heart	ENSSSAG00000049829	ENSSSAT00000021867		0.323252	0.100462	0.000196258	0.0157339
Heart	ENSSSAG00000116601	ENSSSAT00000177066	snapin	0.323371	0.122517	0.00115424	0.0459712
Heart	ENSSSAG00000076675	ENSSSAT00000141210	nfil3	0.32385	0.107052	0.000356273	0.021844
Heart	ENSSSAG00000097788	ENSSSAT00000168971	rnf146	0.324294	0.0932205	7.82e-05	0.00944407
Heart	ENSSSAG00000071226	ENSSSAT00000125391	stx7	0.324675	0.114415	0.000627369	0.0313915
Heart	ENSSSAG00000008886	ENSSSAT00000019736	CHMP5	0.324765	0.0974272	0.000128028	0.0122671
Heart	ENSSSAG00000107836	ENSSSAT00000171516		0.325788	0.121513	0.00102286	0.0425281
Heart	ENSSSAG00000069098	ENSSSAT00000119637	steep1	0.326643	0.0830512	1.32e-05	0.00295936
Heart	ENSSSAG00000040371	ENSSSAT00000057196		0.326762	0.0853518	2.03e-05	0.00388207
Heart	ENSSSAG00000047832	ENSSSAT00000073986	ERH	0.327185	0.0991791	0.000156619	0.0138858
Heart	ENSSSAG00000059032	ENSSSAT00000097017	wdr3	0.328454	0.114207	0.000559662	0.0292827
Heart	ENSSSAG00000078619	ENSSSAT00000147028		0.328835	0.118664	0.00077713	0.035913
Heart	ENSSSAG00000085929	ENSSSAT00000196101		0.329321	0.104999	0.000232049	0.017139
Heart	ENSSSAG00000108145	ENSSSAT00000168981	pstpip1b	0.3296	0.112618	0.000572611	0.0296616
Heart	ENSSSAG00000005356	ENSSSAT00000011484	tssc4	0.331075	0.118536	0.000755876	0.0354578
Heart	ENSSSAG00000050408	ENSSSAT00000078697	UBC9	0.331876	0.106231	0.000251964	0.0181188
Heart	ENSSSAG00000015451	ENSSSAT00000032156	riok3	0.332837	0.124787	0.000974065	0.0412882
Heart	ENSSSAG00000041564	ENSSSAT00000150084	arhgap1	0.333663	0.0973913	8.9e-05	0.0100389
Heart	ENSSSAG00000046726	ENSSSAT00000071502	rpl19	0.334446	0.104192	0.000189587	0.015551
Heart	ENSSSAG00000007965	ENSSSAT00000017671		0.335581	0.10641	0.000246644	0.0178651
Heart	ENSSSAG00000018086	ENSSSAT00000154026	RPL10A	0.336143	0.124614	0.000889885	0.0391627
Heart	ENSSSAG00000015474	ENSSSAT00000028666	zgc:172121	0.336612	0.124605	0.000904203	0.0395688
Heart	ENSSSAG00000073777	ENSSSAT00000132787		0.337128	0.113002	0.000372344	0.0224189
Heart	ENSSSAG00000072884	ENSSSAT00000238680		0.337437	0.108732	0.000263737	0.0185712
Heart	ENSSSAG00000006909	ENSSSAT00000015721	cryzl1	0.338168	0.093586	4.33e-05	0.00640455
Heart	ENSSSAG00000076960	ENSSSAT00000178062	kpna4	0.338967	0.0699521	2.09e-07	0.00012299
Heart	ENSSSAG00000076662	ENSSSAT00000141185	csn7a	0.339701	0.129035	0.00110447	0.0448505
Heart	ENSSSAG00000044819	ENSSSAT00000067150	BCAS2	0.342619	0.0791742	2.25e-06	0.000817072
Heart	ENSSSAG00000002161	ENSSSAT00000004692	UBC9	0.344171	0.0999968	7.98e-05	0.00951172
Heart	ENSSSAG00000059327	ENSSSAT00000097323	SYAP1	0.344714	0.109012	0.000209558	0.0163398
Heart	ENSSSAG00000077778	ENSSSAT00000144585		0.350201	0.135881	0.00114943	0.0459055
Heart	ENSSSAG00000005282	ENSSSAT00000011350	gbrap	0.350406	0.1186	0.000401359	0.0236427
Heart	ENSSSAG00000066776	ENSSSAT00000113096	rpl12	0.351462	0.130794	0.000966649	0.0410939
Heart	ENSSSAG00000058155	ENSSSAT00000095154	mrgbp	0.351695	0.134262	0.00101254	0.0422608
Heart	ENSSSAG00000073900	ENSSSAT00000133077	fa44b	0.352175	0.124707	0.000575724	0.0296616
Heart	ENSSSAG00000044010	ENSSSAT00000065681	rpl7	0.352515	0.114039	0.000252131	0.0181188
Heart	ENSSSAG00000098459	ENSSSAT00000017445	rpl31	0.352627	0.109512	0.000165028	0.0143108
Heart	ENSSSAG00000042831	ENSSSAT00000062785		0.354215	0.110184	0.000172092	0.0146892
Heart	ENSSSAG00000071672	ENSSSAT00000126659		0.354374	0.128107	0.000668709	0.0326258
Heart	ENSSSAG00000044188	ENSSSAT00000116374	rl19	0.354418	0.0967889	3.38e-05	0.00551158
Heart	ENSSSAG00000068438	ENSSSAT00000117748	fam50a	0.354564	0.117149	0.000304773	0.019981
Heart	ENSSSAG00000066189	ENSSSAT00000111628		0.355188	0.114476	0.000246549	0.0178651
Heart	ENSSSAG00000107892	ENSSSAT00000216188	stx17	0.355298	0.117607	0.000308379	0.0200836
Heart	ENSSSAG00000009468	ENSSSAT00000020789	rpl21	0.355768	0.100171	5.06e-05	0.00714312
Heart	ENSSSAG00000019789	ENSSSAT00000093805	rbm12bb	0.356429	0.101128	5.59e-05	0.00749151
Heart	ENSSSAG00000078306	ENSSSAT00000147145	PFKP	-1.34695	0.316227	5.9e-07	0.000277924	x
Heart	ENSSSAG00000040128	ENSSSAT00000056753		0.357086	0.114776	0.000226864	0.0169688
Heart	ENSSSAG00000064168	ENSSSAT00000106249	gtpbp4	0.357136	0.115393	0.000273897	0.0190053
Heart	ENSSSAG00000078845	ENSSSAT00000216888		0.357271	0.130216	0.000709403	0.0339359
Heart	ENSSSAG00000056402	ENSSSAT00000091609		0.357591	0.073532	2.04e-07	0.000121383
Heart	ENSSSAG00000068214	ENSSSAT00000117176	slc7a6os	0.358554	0.123763	0.000449549	0.0253495
Heart	ENSSSAG00000026076	ENSSSAT00000041045		0.359903	0.127297	0.000618248	0.03115
Heart	ENSSSAG00000063012	ENSSSAT00000103152	cssa01h9orf78	0.360326	0.077361	4.68e-07	0.000237043
Heart	ENSSSAG00000121028	ENSSSAT00000065116	tm2d1	0.361951	0.0826317	2.04e-06	0.000771312
Heart	ENSSSAG00000121227	ENSSSAT00000212296		0.362067	0.118215	0.000276823	0.0190675
Heart	ENSSSAG00000076707	ENSSSAT00000141293	rl26	0.362733	0.0949803	1.5e-05	0.00317176
Heart	ENSSSAG00000107070	ENSSSAT00000217204		0.363089	0.137894	0.000943014	0.0404845
Heart	ENSSSAG00000105878	ENSSSAT00000233201	MDK	0.363216	0.125798	0.000481839	0.0264995
Heart	ENSSSAG00000062741	ENSSSAT00000102538	rps14	0.363516	0.117624	0.000252228	0.0181188
Heart	ENSSSAG00000078447	ENSSSAT00000227166	afg2b	0.36621	0.137911	0.000871785	0.0386856
Heart	ENSSSAG00000040727	ENSSSAT00000057830		0.366712	0.110879	0.000134472	0.0126067
Heart	ENSSSAG00000004750	ENSSSAT00000235258		0.369068	0.122597	0.000291924	0.0196616
Heart	ENSSSAG00000067926	ENSSSAT00000197348	rpl19	0.370315	0.119924	0.000239294	0.0175075
Heart	ENSSSAG00000091396	ENSSSAT00000160386		0.371057	0.0974773	1.7e-05	0.00342448
Heart	ENSSSAG00000042048	ENSSSAT00000060893		0.371597	0.0915016	6.34e-06	0.00176396
Heart	ENSSSAG00000093562	ENSSSAT00000018207	exosc1	0.371813	0.119701	0.000222797	0.0169244
Heart	ENSSSAG00000055706	ENSSSAT00000010820	RBBP7	0.372413	0.144539	0.00104419	0.0431179
Heart	ENSSSAG00000078018	ENSSSAT00000145289	RPS25	0.372471	0.12335	0.000304677	0.019981
Heart	ENSSSAG00000066053	ENSSSAT00000111206	rpl30	0.372767	0.119305	0.000219475	0.0167711
Heart	ENSSSAG00000100553	ENSSSAT00000188355		0.373442	0.0985779	1.93e-05	0.00372004
Heart	ENSSSAG00000066482	ENSSSAT00000112382	nmd3	0.373604	0.118074	0.00017995	0.0150646
Heart	ENSSSAG00000084613	ENSSSAT00000165734		0.373618	0.110954	9.05e-05	0.0101587
Heart	ENSSSAG00000000689	ENSSSAT00000001252		0.374292	0.0850419	1.27e-06	0.00052313
Heart	ENSSSAG00000001037	ENSSSAT00000227007		0.374505	0.142236	0.000890635	0.0391627
Heart	ENSSSAG00000094815	ENSSSAT00000178001	trappc4	0.377594	0.104444	3.64e-05	0.00586858
Heart	ENSSSAG00000080211	ENSSSAT00000231081	fis1	0.377935	0.054774	7.05e-13	1.06e-09
Heart	ENSSSAG00000009309	ENSSSAT00000020430	rnaset2	0.378606	0.14243	0.000829536	0.0374988
Heart	ENSSSAG00000043543	ENSSSAT00000064383	blvrb	0.380122	0.13495	0.000536437	0.028513
Heart	ENSSSAG00000005588	ENSSSAT00000011989	RASSF9	0.380266	0.119363	0.000168022	0.0144682
Heart	ENSSSAG00000040208	ENSSSAT00000056904	HMGB1	0.381138	0.0698386	6.63e-09	5.77e-06
Heart	ENSSSAG00000007166	ENSSSAT00000015547	polr2c	0.381249	0.15243	0.00121344	0.0472953
Heart	ENSSSAG00000004822	ENSSSAT00000010325	SRSF6	0.381949	0.0972894	1.29e-05	0.0029094
Heart	ENSSSAG00000084785	ENSSSAT00000135531	PCMT1	0.385069	0.130253	0.000333413	0.0210406
Heart	ENSSSAG00000114797	ENSSSAT00000196790		0.38634	0.133139	0.000417238	0.0241854
Heart	ENSSSAG00000072739	ENSSSAT00000129714	fam32a	0.386744	0.0976271	9.27e-06	0.00234715
Heart	ENSSSAG00000054475	ENSSSAT00000088097	RPL7	0.387405	0.161418	0.00125605	0.0485649
Heart	ENSSSAG00000109892	ENSSSAT00000207128		0.387631	0.130378	0.000359161	0.0219234
Heart	ENSSSAG00000056994	ENSSSAT00000160078		0.387794	0.144324	0.000712779	0.0340322
Heart	ENSSSAG00000054475	ENSSSAT00000088008	RPL7	0.388279	0.116523	9.34e-05	0.0103535
Heart	ENSSSAG00000073793	ENSSSAT00000132786	rcc2	0.389388	0.129091	0.000276234	0.0190571
Heart	ENSSSAG00000091496	ENSSSAT00000148872	SAP18	0.389601	0.128249	0.000264924	0.0185712
Heart	ENSSSAG00000055046	ENSSSAT00000088277		0.390091	0.134882	0.000397195	0.0235568
Heart	ENSSSAG00000077452	ENSSSAT00000212404	calcoco1a	0.392224	0.147024	0.000767116	0.035593
Heart	ENSSSAG00000072870	ENSSSAT00000130132	ddx49	0.392484	0.125003	0.00017692	0.0148681
Heart	ENSSSAG00000072230	ENSSSAT00000230175	rab25b	0.394146	0.146058	0.000700633	0.0336644
Heart	ENSSSAG00000059155	ENSSSAT00000253631	bmal2	0.394385	0.130258	0.000255301	0.0182792
Heart	ENSSSAG00000007090	ENSSSAT00000015348	rps23	0.39439	0.104523	1.78e-05	0.00354251
Heart	ENSSSAG00000001506	ENSSSAT00000003136		0.394933	0.101685	1.22e-05	0.00278668
Heart	ENSSSAG00000103389	ENSSSAT00000227969	rps10	0.395062	0.117557	8.7e-05	0.00996317
Heart	ENSSSAG00000080005	ENSSSAT00000151125		0.396298	0.151394	0.000846189	0.0380246
Heart	ENSSSAG00000002540	ENSSSAT00000005391	pgam5	0.39639	0.157482	0.00107984	0.0442286
Heart	ENSSSAG00000110535	ENSSSAT00000182665		0.396944	0.13879	0.000431055	0.0246904
Heart	ENSSSAG00000055845	ENSSSAT00000098003		0.397	0.110689	3.69e-05	0.00589501
Heart	ENSSSAG00000116373	ENSSSAT00000242236		0.398156	0.154519	0.000910773	0.039718
Heart	ENSSSAG00000078329	ENSSSAT00000146193		0.398287	0.0867583	5.59e-07	0.000271858
Heart	ENSSSAG00000098616	ENSSSAT00000089294	DHRS13	0.398572	0.119722	9.29e-05	0.0103535
Heart	ENSSSAG00000069798	ENSSSAT00000121983		0.398591	0.114847	5.55e-05	0.0074804
Heart	ENSSSAG00000052210	ENSSSAT00000082050	dap	0.398835	0.129066	0.000206715	0.0163123
Heart	ENSSSAG00000006778	ENSSSAT00000014532	llph	0.399868	0.116697	6.49e-05	0.00828944
Heart	ENSSSAG00000071322	ENSSSAT00000125671		0.400625	0.134596	0.000279513	0.0191619
Heart	ENSSSAG00000046270	ENSSSAT00000216252	prpf38a	0.40178	0.151199	0.000748772	0.0353148
Heart	ENSSSAG00000121578	ENSSSAT00000184410	arfrp1	0.402469	0.0960678	4.06e-06	0.0013277
Heart	ENSSSAG00000046028	ENSSSAT00000180964	dynll1	0.402729	0.135008	0.000281668	0.0192792
Heart	ENSSSAG00000047398	ENSSSAT00000073123		0.403146	0.148786	0.000670732	0.0326603
Heart	ENSSSAG00000056485	ENSSSAT00000091875	rps21	0.403343	0.131714	0.00021576	0.0166149
Heart	ENSSSAG00000066243	ENSSSAT00000111671		0.403873	0.126948	0.000151504	0.0135985
Heart	ENSSSAG00000107288	ENSSSAT00000167917		0.409314	0.113815	3.23e-05	0.00534295
Heart	ENSSSAG00000003089	ENSSSAT00000240587	kbrs2	0.411066	0.143281	0.000388758	0.0231511
Heart	ENSSSAG00000098514	ENSSSAT00000157021	cipca	0.411525	0.161663	0.000951622	0.0406935
Heart	ENSSSAG00000084429	ENSSSAT00000201244		0.413243	0.13809	0.000268059	0.0187607
Heart	ENSSSAG00000120943	ENSSSAT00000235139		0.41361	0.146794	0.000456024	0.0256813
Heart	ENSSSAG00000081587	ENSSSAT00000156062	ID1	0.414087	0.162565	0.000923858	0.0400173
Heart	ENSSSAG00000075399	ENSSSAT00000137429	RPL35	0.415422	0.112363	2.98e-05	0.00508701
Heart	ENSSSAG00000056400	ENSSSAT00000171953	tnip1	0.415746	0.140915	0.000305735	0.0200139
Heart	ENSSSAG00000067401	ENSSSAT00000114884		0.416419	0.165876	0.0010187	0.0424362
Heart	ENSSSAG00000049726	ENSSSAT00000231701		0.417384	0.103206	6.07e-06	0.00172777
Heart	ENSSSAG00000080927	ENSSSAT00000202455		0.41833	0.154362	0.000603564	0.0306388
Heart	ENSSSAG00000078353	ENSSSAT00000146280	YY1	0.418812	0.135971	0.000195577	0.0157339
Heart	ENSSSAG00000072189	ENSSSAT00000171471	RPL35	0.420324	0.157369	0.000668492	0.0326258
Heart	ENSSSAG00000071363	ENSSSAT00000125790	imp4	0.420933	0.128271	0.000100233	0.0107472
Heart	ENSSSAG00000116903	ENSSSAT00000166269		0.422546	0.0924055	4.58e-07	0.000234328
Heart	ENSSSAG00000058137	ENSSSAT00000095129		0.422548	0.174	0.00124531	0.0482731
Heart	ENSSSAG00000008466	ENSSSAT00000223119	clpxa	0.422574	0.166792	0.000982212	0.0415123
Heart	ENSSSAG00000045463	ENSSSAT00000068663	rpl26	0.422889	0.0974151	2.19e-06	0.000814645
Heart	ENSSSAG00000048037	ENSSSAT00000074543	tbl1x	0.42299	0.126997	8.37e-05	0.00975347
Heart	ENSSSAG00000039802	ENSSSAT00000171203		0.424791	0.173277	0.00122437	0.0475675
Heart	ENSSSAG00000080922	ENSSSAT00000032034	RPL10A	0.425005	0.122301	4.83e-05	0.00693555
Heart	ENSSSAG00000102224	ENSSSAT00000190195	zgc:63882	0.425051	0.142732	0.000262618	0.0185712
Heart	ENSSSAG00000061383	ENSSSAT00000100675	rpain	0.425447	0.146698	0.000335204	0.0210406
Heart	ENSSSAG00000040392	ENSSSAT00000002141	rnf113a	0.426316	0.154889	0.000545661	0.0288273
Heart	ENSSSAG00000098449	ENSSSAT00000184013	desi2	0.428096	0.171294	0.00100113	0.0418245
Heart	ENSSSAG00000082362	ENSSSAT00000004226	anp32b	0.429376	0.161254	0.00062045	0.0311527
Heart	ENSSSAG00000077280	ENSSSAT00000179273	slc3a2b	0.432481	0.12436	5.07e-05	0.00714312
Heart	ENSSSAG00000077735	ENSSSAT00000144481	uba52	0.435391	0.132584	9.78e-05	0.0106594
Heart	ENSSSAG00000049830	ENSSSAT00000077810	nop56	0.437253	0.173287	0.000912406	0.0397188
Heart	ENSSSAG00000064642	ENSSSAT00000107653		0.439825	0.0933682	2.45e-07	0.000134881
Heart	ENSSSAG00000100294	ENSSSAT00000136070		0.440659	0.0983155	7.56e-07	0.000332612
Heart	ENSSSAG00000085740	ENSSSAT00000186082	naa30	0.441345	0.183428	0.00119544	0.0470205
Heart	ENSSSAG00000065470	ENSSSAT00000217091	mgat2	0.442076	0.108064	4.23e-06	0.00137374
Heart	ENSSSAG00000024307	ENSSSAT00000040010		0.442563	0.122215	2.81e-05	0.00487426
Heart	ENSSSAG00000104937	ENSSSAT00000188972	dio1	0.44301	0.18448	0.00119787	0.0470205
Heart	ENSSSAG00000098753	ENSSSAT00000193354		0.443531	0.135811	9.82e-05	0.0106594
Heart	ENSSSAG00000007063	ENSSSAT00000015267		0.443926	0.157079	0.000328811	0.0209631
Heart	ENSSSAG00000085915	ENSSSAT00000213287		0.450305	0.189316	0.00125125	0.0484602
Heart	ENSSSAG00000075653	ENSSSAT00000138102	psmd9	0.45118	0.153119	0.000289704	0.0196439
Heart	ENSSSAG00000097426	ENSSSAT00000237229	MCUB	0.451715	0.150691	0.000230726	0.017139
Heart	ENSSSAG00000046105	ENSSSAT00000070131		0.458456	0.194047	0.00129609	0.049813
Heart	ENSSSAG00000006983	ENSSSAT00000016517	gpat3	0.45885	0.133972	5.47e-05	0.00742863
Heart	ENSSSAG00000059346	ENSSSAT00000213476		0.459037	0.161496	0.000334758	0.0210406
Heart	ENSSSAG00000080101	ENSSSAT00000151403	commd3	0.459218	0.141786	0.000101954	0.010825
Heart	ENSSSAG00000002154	ENSSSAT00000004674	rpl39	0.459456	0.136512	6.54e-05	0.0083189
Heart	ENSSSAG00000058582	ENSSSAT00000172461	cluap1	0.461078	0.127584	2.68e-05	0.00470676
Heart	ENSSSAG00000064317	ENSSSAT00000106743		0.461619	0.131559	2.69e-05	0.00470676
Heart	ENSSSAG00000085375	ENSSSAT00000209787		0.464138	0.12098	1.14e-05	0.00270806
Heart	ENSSSAG00000078190	ENSSSAT00000145730	nmd3	0.464192	0.124043	1.6e-05	0.00327788
Heart	ENSSSAG00000007291	ENSSSAT00000015885	tri13	0.464554	0.188956	0.000946294	0.0405853
Heart	ENSSSAG00000001972	ENSSSAT00000168125	anp32b	0.465597	0.16762	0.000420701	0.0243213
Heart	ENSSSAG00000086818	ENSSSAT00000230578		0.467963	0.163619	0.000328903	0.0209631
Heart	ENSSSAG00000000556	ENSSSAT00000001024		0.46896	0.1666	0.000377412	0.0226301
Heart	ENSSSAG00000092554	ENSSSAT00000192405		0.469335	0.166826	0.000376846	0.0226274
Heart	ENSSSAG00000101552	ENSSSAT00000179312		0.469559	0.164704	0.000318967	0.0206319
Heart	ENSSSAG00000080530	ENSSSAT00000157946		0.469659	0.195432	0.00111428	0.0449139
Heart	ENSSSAG00000076360	ENSSSAT00000140291	zbtb14	0.472278	0.1403	6.4e-05	0.00822451
Heart	ENSSSAG00000080848	ENSSSAT00000153854	eef2b	0.472866	0.191033	0.00088292	0.0390206
Heart	ENSSSAG00000097009	ENSSSAT00000187982		0.473394	0.1436	7.75e-05	0.00944407
Heart	ENSSSAG00000106015	ENSSSAT00000194417	RAB27A	0.473884	0.131456	2.69e-05	0.00470676
Heart	ENSSSAG00000113097	ENSSSAT00000177241		0.474473	0.175839	0.000485658	0.0265933
Heart	ENSSSAG00000058071	ENSSSAT00000094983	PDCL3	0.474508	0.171442	0.0006	0.0305488
Heart	ENSSSAG00000002569	ENSSSAT00000005469	brms1la	0.47481	0.154751	0.000170703	0.0145993
Heart	ENSSSAG00000069766	ENSSSAT00000175559	rcc2	0.475019	0.179453	0.000594864	0.0303939
Heart	ENSSSAG00000074237	ENSSSAT00000134257	napaa	0.478543	0.180481	0.000565778	0.0294964
Heart	ENSSSAG00000051316	ENSSSAT00000080377	dcun1d1	0.482336	0.184462	0.000605745	0.0306388
Heart	ENSSSAG00000112300	ENSSSAT00000189478		0.48304	0.16197	0.000224771	0.0169244
Heart	ENSSSAG00000071455	ENSSSAT00000126010		0.484872	0.208831	0.00120804	0.0472067
Heart	ENSSSAG00000084477	ENSSSAT00000183026	cript	0.485521	0.15267	0.000113318	0.0115
Heart	ENSSSAG00000080913	ENSSSAT00000153973	GBRAP	0.487428	0.176172	0.000408593	0.023938
Heart	ENSSSAG00000114554	ENSSSAT00000081027	sap18	0.488033	0.169585	0.000292052	0.0196616
Heart	ENSSSAG00000062927	ENSSSAT00000228210	cdh5	0.49286	0.185881	0.000513138	0.0275777
Heart	ENSSSAG00000081348	ENSSSAT00000155356	cog4	0.493316	0.169365	0.000303631	0.0199662
Heart	ENSSSAG00000122032	ENSSSAT00000235292		0.494609	0.151965	8.29e-05	0.00975347
Heart	ENSSSAG00000048880	ENSSSAT00000241361		0.494721	0.128537	1.05e-05	0.00257762
Heart	ENSSSAG00000054475	ENSSSAT00000088029	RPL7	0.495171	0.110038	5.93e-07	0.000277924
Heart	ENSSSAG00000042491	ENSSSAT00000174053	rtf2	0.495182	0.187274	0.000578602	0.0297375
Heart	ENSSSAG00000082318	ENSSSAT00000159643	S10I	0.495834	0.168066	0.000227331	0.0169746
Heart	ENSSSAG00000082680	ENSSSAT00000251244	chrac1	0.497631	0.177292	0.000360086	0.0219234
Heart	ENSSSAG00000071743	ENSSSAT00000231351	cyp27a3	0.49781	0.19549	0.000723606	0.0344639
Heart	ENSSSAG00000041666	ENSSSAT00000162488	PRIMPOL	0.498454	0.205019	0.000972321	0.0412545
Heart	ENSSSAG00000090761	ENSSSAT00000230671		0.501224	0.179568	0.000370642	0.02236
Heart	ENSSSAG00000071862	ENSSSAT00000127211	RS27	0.502209	0.17336	0.000259136	0.0184599
Heart	ENSSSAG00000105647	ENSSSAT00000207817		0.503307	0.200009	0.000758988	0.0354828
Heart	ENSSSAG00000078629	ENSSSAT00000147772	papss2b	0.505198	0.161075	0.000129757	0.0123602
Heart	ENSSSAG00000006134	ENSSSAT00000013279		0.506728	0.0917226	2.61e-09	2.71e-06
Heart	ENSSSAG00000054460	ENSSSAT00000086881		0.508379	0.205176	0.000810115	0.036771
Heart	ENSSSAG00000043031	ENSSSAT00000183584	cers5	0.509051	0.159324	0.000104539	0.0109923
Heart	ENSSSAG00000066850	ENSSSAT00000120621	osbpl9	0.509297	0.141032	2.38e-05	0.00432726
Heart	ENSSSAG00000039966	ENSSSAT00000056417	hsf2	0.509591	0.0910237	1.91e-09	2.19e-06
Heart	ENSSSAG00000064636	ENSSSAT00000167881		0.511471	0.113562	5.59e-07	0.000271858
Heart	ENSSSAG00000070305	ENSSSAT00000122914	hmgb1b	0.513206	0.0975556	1.34e-08	1.1e-05
Heart	ENSSSAG00000094623	ENSSSAT00000230477	GNA14	0.513688	0.147487	3.72e-05	0.00589501
Heart	ENSSSAG00000007060	ENSSSAT00000015245	TFAP4	0.513861	0.205477	0.000782758	0.0360582
Heart	ENSSSAG00000109988	ENSSSAT00000203419	CREG1	0.514057	0.161527	0.000108024	0.0111842
Heart	ENSSSAG00000115609	ENSSSAT00000130213		0.517323	0.205089	0.000724781	0.0344822
Heart	ENSSSAG00000121467	ENSSSAT00000245258		0.517595	0.176709	0.000231818	0.017139
Heart	ENSSSAG00000000128	ENSSSAT00000000228		0.521825	0.092014	1.23e-09	1.44e-06
Heart	ENSSSAG00000040360	ENSSSAT00000203213		0.524634	0.22133	0.00103313	0.0428733
Heart	ENSSSAG00000064191	ENSSSAT00000128855	msna	0.525002	0.193477	0.000424314	0.0244977
Heart	ENSSSAG00000084431	ENSSSAT00000244921	tex2	0.526218	0.215947	0.000889577	0.0391627
Heart	ENSSSAG00000090880	ENSSSAT00000207704		0.526982	0.226916	0.00118095	0.0466932
Heart	ENSSSAG00000095716	ENSSSAT00000210123	ppp1r3da	0.527822	0.196076	0.000468398	0.0260746
Heart	ENSSSAG00000076333	ENSSSAT00000209093	nr2f6a	0.528829	0.22601	0.00111879	0.0450121
Heart	ENSSSAG00000007092	ENSSSAT00000015328		0.531591	0.209694	0.00068367	0.033142
Heart	ENSSSAG00000087989	ENSSSAT00000237785		0.53485	0.152928	3.18e-05	0.00533157
Heart	ENSSSAG00000039293	ENSSSAT00000055096	TPMT	0.535043	0.200557	0.000499751	0.0271365
Heart	ENSSSAG00000120264	ENSSSAT00000221887		0.535216	0.203305	0.000505926	0.027325
Heart	ENSSSAG00000000149	ENSSSAT00000000242	cq039	0.5385	0.202657	0.000473231	0.0262006
Heart	ENSSSAG00000079401	ENSSSAT00000149342	PDCL3	0.538822	0.159942	5.23e-05	0.00725458
Heart	ENSSSAG00000071715	ENSSSAT00000223176	CREB3L4	0.539082	0.223391	0.000919053	0.0399284
Heart	ENSSSAG00000075929	ENSSSAT00000139089	TIAM2	0.539163	0.145473	1.53e-05	0.00317899
Heart	ENSSSAG00000047422	ENSSSAT00000073182	RL29	0.539647	0.104435	2.26e-08	1.7e-05
Heart	ENSSSAG00000080851	ENSSSAT00000153808	rad18	0.540693	0.159908	5.11e-05	0.00714967
Heart	ENSSSAG00000042312	ENSSSAT00000061530	ca108	0.544443	0.187427	0.000239083	0.0175075
Heart	ENSSSAG00000056674	ENSSSAT00000092209	AKAP13	0.544836	0.228112	0.00093202	0.0403303
Heart	ENSSSAG00000112478	ENSSSAT00000208033		0.545143	0.130968	2.21e-06	0.000814645
Heart	ENSSSAG00000101988	ENSSSAT00000089618	LAPTM4A	0.545315	0.188957	0.000244844	0.0178236
Heart	ENSSSAG00000119808	ENSSSAT00000222385		0.546168	0.231623	0.00103906	0.0429691
Heart	ENSSSAG00000072859	ENSSSAT00000130087	mepcea	0.548312	0.137264	4.84e-06	0.00146361
Heart	ENSSSAG00000048571	ENSSSAT00000075381	INIP	0.549086	0.186326	0.000208688	0.0163398
Heart	ENSSSAG00000106218	ENSSSAT00000200210	nkain1	0.549328	0.153415	2.47e-05	0.00444345
Heart	ENSSSAG00000066581	ENSSSAT00000112550	clec3ba	0.549414	0.216915	0.000659713	0.0323773
Heart	ENSSSAG00000094498	ENSSSAT00000190047		0.551004	0.153453	2.23e-05	0.00413943
Heart	ENSSSAG00000120241	ENSSSAT00000243117	si:ch211-212o1.2	0.552834	0.198337	0.000331914	0.0210406
Heart	ENSSSAG00000116338	ENSSSAT00000189685	upf3b	0.553118	0.179137	0.000130496	0.0123763
Heart	ENSSSAG00000121715	ENSSSAT00000212801		0.554988	0.159272	3.31e-05	0.00543138
Heart	ENSSSAG00000116401	ENSSSAT00000246469		0.555712	0.197501	0.000296383	0.0197864
Heart	ENSSSAG00000002268	ENSSSAT00000215409	ptk2ab	0.556798	0.219688	0.00068131	0.0330697
Heart	ENSSSAG00000090296	ENSSSAT00000235198		0.56257	0.13786	3.26e-06	0.00112741
Heart	ENSSSAG00000057845	ENSSSAT00000094602		0.566445	0.171604	6.38e-05	0.00821911
Heart	ENSSSAG00000069593	ENSSSAT00000180570	RPS3A	0.567217	0.195622	0.000216026	0.0166149
Heart	ENSSSAG00000006134	ENSSSAT00000013260		0.568607	0.127029	5.94e-07	0.000277924
Heart	ENSSSAG00000118777	ENSSSAT00000251019		0.569847	0.246978	0.00109972	0.0446993
Heart	ENSSSAG00000074889	ENSSSAT00000137908		0.572091	0.201696	0.000272374	0.0189712
Heart	ENSSSAG00000064315	ENSSSAT00000196146	znhit3	0.57608	0.252476	0.0011316	0.0454016
Heart	ENSSSAG00000054237	ENSSSAT00000171309		0.576427	0.163497	3.22e-05	0.00534295
Heart	ENSSSAG00000082362	ENSSSAT00000004222	anp32b	0.578649	0.143119	3.64e-06	0.00121912
Heart	ENSSSAG00000111233	ENSSSAT00000245698		0.580671	0.223447	0.000509601	0.0274894
Heart	ENSSSAG00000092613	ENSSSAT00000222184		0.581496	0.238002	0.000752081	0.0353818
Heart	ENSSSAG00000058756	ENSSSAT00000096336	skip	0.586242	0.202314	0.00022529	0.0169244
Heart	ENSSSAG00000001043	ENSSSAT00000002148	rnf113a	0.586703	0.209246	0.000277842	0.0191074
Heart	ENSSSAG00000109288	ENSSSAT00000205056	si:ch211-157b11.12	0.588954	0.177433	5.64e-05	0.00749451
Heart	ENSSSAG00000000775	ENSSSAT00000221679	chch8	0.5909	0.214956	0.000333677	0.0210406
Heart	ENSSSAG00000078630	ENSSSAT00000147060	ctdsp2	0.591953	0.157955	1.21e-05	0.00278636
Heart	ENSSSAG00000073619	ENSSSAT00000252097	bloc1s1	0.592044	0.16996	3.21e-05	0.00534295
Heart	ENSSSAG00000097365	ENSSSAT00000165537	spink2.5	0.592483	0.214264	0.000323338	0.0207212
Heart	ENSSSAG00000070043	ENSSSAT00000122178	eapp	0.597157	0.267278	0.001213	0.0472953
Heart	ENSSSAG00000092676	ENSSSAT00000225246		0.600545	0.248741	0.000810902	0.036771
Heart	ENSSSAG00000065014	ENSSSAT00000108509		0.600989	0.168237	2.43e-05	0.00438628
Heart	ENSSSAG00000042591	ENSSSAT00000251691		0.602488	0.214904	0.000290738	0.0196616
Heart	ENSSSAG00000121039	ENSSSAT00000251508	mkrn1	0.60301	0.204178	0.000164947	0.0143108
Heart	ENSSSAG00000007667	ENSSSAT00000211540	IQSEC1	0.603304	0.138739	8.59e-07	0.00036832
Heart	ENSSSAG00000103284	ENSSSAT00000218578	smad9	0.605654	0.234129	0.00053572	0.0285097
Heart	ENSSSAG00000069554	ENSSSAT00000145650		0.607793	0.213295	0.000225676	0.0169244
Heart	ENSSSAG00000072758	ENSSSAT00000221187	gpcpd1	0.607968	0.205749	0.00018257	0.0151962
Heart	ENSSSAG00000085183	ENSSSAT00000202561		0.608291	0.247369	0.000717792	0.0342245
Heart	ENSSSAG00000002485	ENSSSAT00000170720		0.610437	0.216893	0.00027833	0.0191108
Heart	ENSSSAG00000041995	ENSSSAT00000060743		0.611519	0.194111	9.71e-05	0.0106513
Heart	ENSSSAG00000054375	ENSSSAT00000086717	pno1	0.611912	0.163185	1.11e-05	0.0026763
Heart	ENSSSAG00000076834	ENSSSAT00000141696	ephx1	0.613801	0.136764	4.96e-07	0.000248152
Heart	ENSSSAG00000057842	ENSSSAT00000094786	gnb2l1	0.614691	0.163265	9.84e-06	0.00244822
Heart	ENSSSAG00000069610	ENSSSAT00000122476	taok3a	0.618428	0.256997	0.000792794	0.0363648
Heart	ENSSSAG00000043325	ENSSSAT00000063922		0.622728	0.228014	0.00034753	0.0215508
Heart	ENSSSAG00000094999	ENSSSAT00000176219		0.624852	0.153769	3.37e-06	0.00114763
Heart	ENSSSAG00000040482	ENSSSAT00000057296	TFAP4	0.626473	0.165537	9.97e-06	0.00245254
Heart	ENSSSAG00000015544	ENSSSAT00000028797		0.630628	0.197291	7.83e-05	0.00944407
Heart	ENSSSAG00000078306	ENSSSAT00000146585	PFKP	-1.06259	0.299211	1.59e-05	0.00327203	x
Heart	ENSSSAG00000113626	ENSSSAT00000193686		0.63584	0.274466	0.000884517	0.0390515
Heart	ENSSSAG00000001780	ENSSSAT00000206064	ypel3	0.636527	0.257739	0.000626877	0.0313915
Heart	ENSSSAG00000121834	ENSSSAT00000207614	cry3b	0.637182	0.187148	3.93e-05	0.00610658
Heart	ENSSSAG00000078619	ENSSSAT00000147020		0.639242	0.130835	6.52e-08	4.36e-05
Heart	ENSSSAG00000063569	ENSSSAT00000105052	fra10ac1	0.642086	0.273325	0.00089444	0.0392508
Heart	ENSSSAG00000007260	ENSSSAT00000020183		0.644341	0.212929	0.000137135	0.0127283
Heart	ENSSSAG00000061233	ENSSSAT00000209221	ubald1b	0.64973	0.219865	0.000168506	0.0144682
Heart	ENSSSAG00000099819	ENSSSAT00000086912	slc6a22.1	0.654052	0.286933	0.000948801	0.0406224
Heart	ENSSSAG00000088515	ENSSSAT00000233180		0.656274	0.23511	0.000271677	0.018953
Heart	ENSSSAG00000097114	ENSSSAT00000213419		0.657108	0.218468	0.000144487	0.0132417
Heart	ENSSSAG00000075253	ENSSSAT00000137196		0.659593	0.296402	0.00111027	0.0449139
Heart	ENSSSAG00000081022	ENSSSAT00000154342	emc3	0.668029	0.246306	0.000340493	0.0212965
Heart	ENSSSAG00000002415	ENSSSAT00000005144		0.669632	0.259874	0.000478084	0.0263777
Heart	ENSSSAG00000059009	ENSSSAT00000232572	bccip	0.670554	0.171371	5.34e-06	0.0015914
Heart	ENSSSAG00000118794	ENSSSAT00000170485		0.672617	0.185561	1.73e-05	0.00344766
Heart	ENSSSAG00000047059	ENSSSAT00000072216	oaz2a	0.673669	0.212992	9.5e-05	0.0104746
Heart	ENSSSAG00000065991	ENSSSAT00000110993		0.676928	0.165822	3.57e-06	0.00120445
Heart	ENSSSAG00000081501	ENSSSAT00000155808		0.689461	0.240493	0.000209746	0.0163398
Heart	ENSSSAG00000001448	ENSSSAT00000002983		0.695665	0.237774	0.000175879	0.014864
Heart	ENSSSAG00000004774	ENSSSAT00000232737		0.699521	0.308925	0.000991483	0.041649
Heart	ENSSSAG00000050044	ENSSSAT00000080607	nxf1a	0.700226	0.204368	3.32e-05	0.00543852
Heart	ENSSSAG00000057674	ENSSSAT00000094179	t53i2	0.700872	0.212087	4.95e-05	0.00701425
Heart	ENSSSAG00000087608	ENSSSAT00000222726	tmem88a	0.705007	0.311991	0.000991367	0.041649
Heart	ENSSSAG00000092636	ENSSSAT00000183753	mcamb	0.705014	0.244727	0.000206845	0.0163123
Heart	ENSSSAG00000001458	ENSSSAT00000003001		0.705319	0.225648	9.3e-05	0.0103535
Heart	ENSSSAG00000071862	ENSSSAT00000127214	RS27	0.706667	0.161302	6.51e-07	0.000292276
Heart	ENSSSAG00000064516	ENSSSAT00000107727		0.70791	0.278563	0.000471403	0.0261583
Heart	ENSSSAG00000006662	ENSSSAT00000129678		0.708348	0.297994	0.000756722	0.0354592
Heart	ENSSSAG00000041016	ENSSSAT00000058418	zgc:112271	0.711009	0.25106	0.000222909	0.0169244
Heart	ENSSSAG00000104588	ENSSSAT00000212030	pik3ip1	0.712556	0.258398	0.000264295	0.0185712
Heart	ENSSSAG00000005332	ENSSSAT00000011466		0.714414	0.267824	0.000359959	0.0219234
Heart	ENSSSAG00000068825	ENSSSAT00000134922	TRIP12	0.715729	0.252937	0.00020976	0.0163398
Heart	ENSSSAG00000059242	ENSSSAT00000097146		0.716334	0.209104	3.4e-05	0.00551463
Heart	ENSSSAG00000085520	ENSSSAT00000210919		0.727891	0.307918	0.000766956	0.035593
Heart	ENSSSAG00000074035	ENSSSAT00000229629		0.729836	0.254909	0.000199067	0.0158424
Heart	ENSSSAG00000106362	ENSSSAT00000162744		0.730323	0.270464	0.000322142	0.0206883
Heart	ENSSSAG00000111101	ENSSSAT00000194083	cssa01h5orf63	0.736158	0.186353	4.43e-06	0.00140744
Heart	ENSSSAG00000041016	ENSSSAT00000171189	zgc:112271	0.737268	0.29089	0.000448696	0.0253342
Heart	ENSSSAG00000080743	ENSSSAT00000153521		0.739152	0.298466	0.000560383	0.0292852
Heart	ENSSSAG00000065014	ENSSSAT00000108489		0.73936	0.25984	0.000210111	0.0163398
Heart	ENSSSAG00000068953	ENSSSAT00000119220	STMN1	0.74658	0.234512	6.93e-05	0.00869786
Heart	ENSSSAG00000099913	ENSSSAT00000210158	wu:fc63a07	0.75076	0.263624	0.000209627	0.0163398
Heart	ENSSSAG00000118778	ENSSSAT00000229170	sntb1	0.750898	0.173903	9.69e-07	0.00040568	x
Heart	ENSSSAG00000004144	ENSSSAT00000010165	EZH1	0.751999	0.253003	0.000136614	0.0127283
Heart	ENSSSAG00000075495	ENSSSAT00000137694		0.756702	0.294403	0.000442106	0.0250923
Heart	ENSSSAG00000010774	ENSSSAT00000023330	FRIM	0.757306	0.265462	0.0002026	0.0160648
Heart	ENSSSAG00000099141	ENSSSAT00000251737		0.759109	0.239225	8.49e-05	0.00981614
Heart	ENSSSAG00000077887	ENSSSAT00000144909	rab11bb	0.759123	0.254175	0.000130062	0.0123622
Heart	ENSSSAG00000090248	ENSSSAT00000221757	c209e	0.774485	0.2594	0.000134383	0.0126067
Heart	ENSSSAG00000077948	ENSSSAT00000213370	AFF4	0.774512	0.323178	0.000565127	0.0294964
Heart	ENSSSAG00000077865	ENSSSAT00000168605	and3	0.781169	0.290178	0.000298102	0.0197864
Heart	ENSSSAG00000075825	ENSSSAT00000143877	nrd1b	0.781364	0.270213	0.000151032	0.0135842
Heart	ENSSSAG00000047429	ENSSSAT00000205675	LY75	0.785336	0.232487	3.71e-05	0.00589501
Heart	ENSSSAG00000039397	ENSSSAT00000077920		0.789263	0.310316	0.000400283	0.0236265
Heart	ENSSSAG00000007012	ENSSSAT00000173381	pdcd2	0.790853	0.25497	9.2e-05	0.0102926
Heart	ENSSSAG00000020818	ENSSSAT00000034871	iqcg	0.791528	0.227742	2.69e-05	0.00470676
Heart	ENSSSAG00000090937	ENSSSAT00000019461		0.795537	0.317095	0.000501964	0.0271785
Heart	ENSSSAG00000068636	ENSSSAT00000118431		0.797162	0.245679	5.86e-05	0.00770134
Heart	ENSSSAG00000115374	ENSSSAT00000189959		0.797664	0.275708	0.00017541	0.014864
Heart	ENSSSAG00000090248	ENSSSAT00000210037	c209e	0.798251	0.212665	9e-06	0.00229194
Heart	ENSSSAG00000094014	ENSSSAT00000181456		0.802233	0.281216	0.000193881	0.0157339
Heart	ENSSSAG00000056400	ENSSSAT00000171350	tnip1	0.803979	0.236585	2.29e-05	0.00423096
Heart	ENSSSAG00000078575	ENSSSAT00000223087		0.806631	0.286785	0.000213726	0.0165256
Heart	ENSSSAG00000081969	ENSSSAT00000186609		0.813494	0.247608	4.53e-05	0.00664478
Heart	ENSSSAG00000045598	ENSSSAT00000073133	smarca2	0.814285	0.295978	0.000197983	0.0158139
Heart	ENSSSAG00000117512	ENSSSAT00000210241	rab1a	0.816527	0.268741	0.000112171	0.0115
Heart	ENSSSAG00000093382	ENSSSAT00000208305		0.840325	0.373945	0.000853884	0.0381244
Heart	ENSSSAG00000054819	ENSSSAT00000088045	rpl10	0.84739	0.252987	3.86e-05	0.00601753
Heart	ENSSSAG00000011330	ENSSSAT00000210101	h3f3a	0.849881	0.30761	0.000243907	0.0177994
Heart	ENSSSAG00000007550	ENSSSAT00000021571	EZH1	0.86094	0.256985	3.46e-05	0.00560062
Heart	ENSSSAG00000108728	ENSSSAT00000246961		0.864954	0.39275	0.000949025	0.0406224
Heart	ENSSSAG00000115007	ENSSSAT00000161260		0.865042	0.237297	1.13e-05	0.0026996
Heart	ENSSSAG00000089565	ENSSSAT00000242100	map2k5	0.865382	0.28977	0.000123717	0.0119948
Heart	ENSSSAG00000088475	ENSSSAT00000219739		0.891655	0.299603	0.000120346	0.0119056
Heart	ENSSSAG00000103838	ENSSSAT00000169521	mks1	0.894847	0.236371	6.19e-06	0.00174777
Heart	ENSSSAG00000095460	ENSSSAT00000216793		0.93363	0.441587	0.0011115	0.0449139
Heart	ENSSSAG00000062787	ENSSSAT00000102606	zgc:162608	0.939195	0.364264	0.000378596	0.0226699
Heart	ENSSSAG00000121776	ENSSSAT00000200372		0.945877	0.328495	0.000162831	0.0142336
Heart	ENSSSAG00000119148	ENSSSAT00000160188		0.948199	0.451274	0.00112496	0.0452185
Heart	ENSSSAG00000009203	ENSSSAT00000050635		0.973103	0.492829	0.000992145	0.041649
Heart	ENSSSAG00000093600	ENSSSAT00000191864	ZFP36L2	0.982789	0.231335	8.63e-07	0.00036832
Heart	ENSSSAG00000091927	ENSSSAT00000133841	AMD1	0.986205	0.242018	1.78e-06	0.000705964
Heart	ENSSSAG00000000255	ENSSSAT00000162254	bnip3	0.987416	0.310668	6.22e-05	0.00806482
Heart	ENSSSAG00000066193	ENSSSAT00000112408		1.02784	0.384742	0.000282333	0.0192856
Heart	ENSSSAG00000080424	ENSSSAT00000152434		1.04831	0.438276	0.000578218	0.0297375
Heart	ENSSSAG00000115603	ENSSSAT00000246361	tnni1b	1.08313	0.366471	0.00011333	0.0115
Heart	ENSSSAG00000077051	ENSSSAT00000142741		1.10821	0.497984	0.000635179	0.0315294
Heart	ENSSSAG00000090248	ENSSSAT00000190163	c209e	1.10993	0.393325	0.000155711	0.0138335
Heart	ENSSSAG00000047444	ENSSSAT00000091065		1.1156	0.484512	0.000493582	0.0268919
Heart	ENSSSAG00000098791	ENSSSAT00000164816		1.12152	0.481354	0.0004027	0.0236897
Heart	ENSSSAG00000013481	ENSSSAT00000028436	atg4b	1.14686	0.26259	5.62e-07	0.000271858
Heart	ENSSSAG00000077147	ENSSSAT00000143135		1.1493	0.585817	0.00076857	0.035593
Heart	ENSSSAG00000081940	ENSSSAT00000226349		1.15804	0.460254	0.000400541	0.0236265
Heart	ENSSSAG00000053914	ENSSSAT00000086005		1.15892	0.517675	0.0006607	0.0323892
Heart	ENSSSAG00000109848	ENSSSAT00000217609		1.18046	0.369845	3.98e-05	0.00616621
Heart	ENSSSAG00000076710	ENSSSAT00000146022	MPDZ	1.21359	0.454945	0.000154015	0.0137671
Heart	ENSSSAG00000004856	ENSSSAT00000015620	atf7ip	1.21501	0.470428	0.000292083	0.0196616
Heart	ENSSSAG00000068990	ENSSSAT00000124150	unc45a	-1.31485	0.659697	0.00109114	0.0444996	x
Heart	ENSSSAG00000113917	ENSSSAT00000177488		1.2254	0.565494	0.00080868	0.0367468
Heart	ENSSSAG00000075155	ENSSSAT00000237496		1.24278	0.329896	7.47e-06	0.00199474
Heart	ENSSSAG00000064919	ENSSSAT00000108195	gamt	1.26387	0.237913	5.1e-09	4.74e-06
Heart	ENSSSAG00000103136	ENSSSAT00000211335		1.27162	0.619252	0.00103715	0.0429691
Heart	ENSSSAG00000044417	ENSSSAT00000072654		1.29389	0.445318	0.000133262	0.0125838
Heart	ENSSSAG00000065996	ENSSSAT00000110987		1.36636	0.482871	0.000157975	0.0139776
Heart	ENSSSAG00000099524	ENSSSAT00000207988	nfil3-5	1.41288	0.41237	1.19e-05	0.00277741
Heart	ENSSSAG00000065996	ENSSSAT00000110991		1.49475	0.349613	8.33e-07	0.000362512
Heart	ENSSSAG00000008321	ENSSSAT00000018551	ptn	1.61092	0.242348	1.47e-12	2.13e-09
Heart	ENSSSAG00000115603	ENSSSAT00000197362	tnni1b	1.69807	0.54692	7.78e-05	0.00944407
Heart	ENSSSAG00000068190	ENSSSAT00000117181	plbd1a	1.78392	0.796389	0.000272933	0.0189797
Heart	ENSSSAG00000107126	ENSSSAT00000164649		1.82347	1.06097	0.000636271	0.0315294
Heart	ENSSSAG00000059640	ENSSSAT00000097884		1.87585	0.639973	0.000104141	0.0109823
Heart	ENSSSAG00000096137	ENSSSAT00000188897		2.1869	1.59494	9.03e-05	0.0101572
Heart	ENSSSAG00000110697	ENSSSAT00000216640		3.07445	0.874846	1.15e-05	0.00272018
Heart	ENSSSAG00000054929	ENSSSAT00000096797	casq2	3.783	2.87457	0.000100533	0.0107528
Heart	ENSSSAG00000039557	ENSSSAT00000065566	hspa4b	4.39279	2.551	7.32e-05	0.00907997
Heart	ENSSSAG00000003706	ENSSSAT00000223617		4.94375	2.72094	0.000165399	0.0143144
Heart	ENSSSAG00000003535	ENSSSAT00000010122	gspt1	4.98453	1.3805	7.54e-06	0.00200261
Heart	ENSSSAG00000058783	ENSSSAT00000096888		5.38856	1.99833	0.000128217	0.0122671
Heart	ENSSSAG00000108147	ENSSSAT00000236417		10.6017	3.31634	3.83e-08	2.65e-05
Heart	ENSSSAG00000004112	ENSSSAT00000177080	scpep1	10.7952	3.329	2.04e-08	1.61e-05
Heart	ENSSSAG00000072917	ENSSSAT00000132921		10.8338	3.31323	1.08e-08	9.01e-06
Heart	ENSSSAG00000046918	ENSSSAT00000072086	pdgfrb	10.9603	3.42574	2.59e-08	1.85e-05
Heart	ENSSSAG00000110512	ENSSSAT00000211084		11.2912	3.34842	2.82e-09	2.79e-06
Heart	ENSSSAG00000003038	ENSSSAT00000012499		11.5346	3.93595	5.96e-06	0.0017168
Heart	ENSSSAG00000059264	ENSSSAT00000097263		11.6574	3.40269	7.38e-10	9.19e-07
Heart	ENSSSAG00000004003	ENSSSAT00000011313		11.784	3.40832	1.17e-09	1.42e-06
Heart	ENSSSAG00000056633	ENSSSAT00000060110		12.0755	3.98463	2.25e-06	0.000817072
Heart	ENSSSAG00000041584	ENSSSAT00000060521		12.403	3.43604	3.65e-11	4.96e-08
Heart	ENSSSAG00000079199	ENSSSAT00000172328	padi2	13.8809	3.25992	4.56e-29	1.99e-24
Stomach	ENSSSAG00000051745	ENSSSAT00000081203	ccn5	-6.55195	2.11648	3.29e-05	0.049067
Stomach	ENSSSAG00000099623	ENSSSAT00000241265	fkbp5	-2.87182	1.10208	2.12e-05	0.0342638
Stomach	ENSSSAG00000108594	ENSSSAT00000191429		-2.43719	0.656477	2.65e-06	0.00687719
Stomach	ENSSSAG00000105247	ENSSSAT00000025268	RT33	-1.58827	0.448366	1.4e-05	0.0263413
Stomach	ENSSSAG00000008433	ENSSSAT00000069611		-6.7e-06	0.0014427	1.65e-07	0.000519754
Stomach	ENSSSAG00000051104	ENSSSAT00000092559		-3.64e-06	0.0014427	1.43e-08	4.74e-05
Stomach	ENSSSAG00000004649	ENSSSAT00000009957	fam222ba	-2.32e-06	0.0014427	2.01e-05	0.0333375
Stomach	ENSSSAG00000099243	ENSSSAT00000160244		-2.11e-06	0.0014427	1.44e-05	0.0263413
Stomach	ENSSSAG00000087626	ENSSSAT00000217405		-1.97e-06	0.0014427	6.07e-06	0.0150944
Stomach	ENSSSAG00000001956	ENSSSAT00000004414	tbc1d17	-1.66e-06	0.00144269	1.6e-05	0.0273477
Stomach	ENSSSAG00000042976	ENSSSAT00000091669	PARD3	-1.56e-06	0.00144269	2.21e-06	0.00600437
Stomach	ENSSSAG00000071949	ENSSSAT00000127490	SLC43A2	-1.56e-06	0.00144269	8.26e-06	0.0182688
Stomach	ENSSSAG00000089317	ENSSSAT00000211504	slmapa	-1.55e-06	0.00144269	1.17e-05	0.0241886
Stomach	ENSSSAG00000072556	ENSSSAT00000129248	rai14	-1.32e-06	0.00144269	8.84e-07	0.00263908
Stomach	ENSSSAG00000058230	ENSSSAT00000254218		-1.3e-06	0.00144269	7.63e-06	0.0175321
Stomach	ENSSSAG00000101263	ENSSSAT00000201252		-4.93e-07	0.00144269	1.5e-05	0.0263413
Stomach	ENSSSAG00000042254	ENSSSAT00000063049	spon1b	-4.38e-07	0.00144269	2.65e-15	1.39e-11
Stomach	ENSSSAG00000068430	ENSSSAT00000117959	NARS1	-3.66e-07	0.00144269	1.73e-16	2.07e-12
Stomach	ENSSSAG00000114319	ENSSSAT00000201641	atg14	3.71e-07	0.00144269	1.03e-15	6.13e-12
Stomach	ENSSSAG00000077119	ENSSSAT00000142683	kin	3.71e-07	0.00144269	2.79e-15	1.39e-11
Stomach	ENSSSAG00000065457	ENSSSAT00000109645	PHKB	3.72e-07	0.00144269	3.46e-17	6.89e-13
Stomach	ENSSSAG00000007929	ENSSSAT00000017720		3.72e-07	0.00144269	1.7e-14	7.8e-11
Stomach	ENSSSAG00000092606	ENSSSAT00000235663	dgke	3.74e-07	0.00144269	3.18e-16	2.37e-12
Stomach	ENSSSAG00000039715	ENSSSAT00000056017	mmsa	3.76e-07	0.00144269	1.96e-18	1.17e-13
Stomach	ENSSSAG00000042897	ENSSSAT00000063745	plcd3a	3.77e-07	0.00144269	3.14e-16	2.37e-12
Stomach	ENSSSAG00000048354	ENSSSAT00000075260	aldh9a1a.1	3.79e-07	0.00144269	5.69e-17	8.5e-13
Stomach	ENSSSAG00000007460	ENSSSAT00000016350	fkbp4	3.82e-07	0.00144269	4.24e-18	1.27e-13
Stomach	ENSSSAG00000054760	ENSSSAT00000091713		4.17e-07	0.00144269	2.11e-16	2.1e-12
Stomach	ENSSSAG00000054345	ENSSSAT00000129328	SBF2	4.64e-07	0.00144269	3.91e-16	2.59e-12
Stomach	ENSSSAG00000109945	ENSSSAT00000182096		4.88e-07	0.00144269	1.17e-06	0.00332732
Stomach	ENSSSAG00000054181	ENSSSAT00000161369		7.15e-07	0.00144269	3.02e-05	0.0474406
Stomach	ENSSSAG00000111347	ENSSSAT00000229077	glceb	1.33e-06	0.00144269	1.47e-05	0.0263413
Stomach	ENSSSAG00000073442	ENSSSAT00000132202	lctlb	1.47e-06	0.00144269	6.32e-06	0.0150944
Stomach	ENSSSAG00000071519	ENSSSAT00000126193		1.62e-06	0.00144269	1e-05	0.0213583
Stomach	ENSSSAG00000089520	ENSSSAT00000202480		2.22697	0.717436	1.34e-05	0.0263413
Stomach	ENSSSAG00000113746	ENSSSAT00000221498		5.3784	1.80081	3.16e-05	0.0484628
Stomach	ENSSSAG00000105141	ENSSSAT00000212364		8.44942	2.81337	2.67e-09	9.96e-06
Stomach	ENSSSAG00000080613	ENSSSAT00000180915	tox2	8.58644	2.76834	6.78e-11	2.7e-07
Stomach	ENSSSAG00000056298	ENSSSAT00000091405	vezf1b	9.81838	2.92324	9.89e-13	4.22e-09
Stomach	ENSSSAG00000045074	ENSSSAT00000068365	pias2	11.6081	3.47705	1.26e-08	4.42e-05

## Sheet: Supporting Info 3 - DTU
muscle	gene_id	transcript_id	gene_name	gene _adjusted_p-values	transcript_adjusted_p-values	muscle_gene
Adductor mandibulae	ENSSSAG00000004989	ENSSSAT00000215370	NA	0.00472472	0.000651221
Adductor mandibulae	ENSSSAG00000007765	ENSSSAT00000017173	ufc1	0.00472472	0
Adductor mandibulae	ENSSSAG00000007765	ENSSSAT00000017163	ufc1	0.00472472	0
Adductor mandibulae	ENSSSAG00000040338	ENSSSAT00000222963	spega	0.0273178	0
Adductor mandibulae	ENSSSAG00000040338	ENSSSAT00000163346	spega	0.0273178	0
Adductor mandibulae	ENSSSAG00000050672	ENSSSAT00000079229	stk4	0.00619052	0
Adductor mandibulae	ENSSSAG00000050672	ENSSSAT00000079102	stk4	0.00619052	0
Adductor mandibulae	ENSSSAG00000055455	ENSSSAT00000089261	pdik1l	0.00472472	0	x
Adductor mandibulae	ENSSSAG00000055455	ENSSSAT00000168450	pdik1l	0.00472472	0	x
Adductor mandibulae	ENSSSAG00000067196	ENSSSAT00000114221	tieg3	0.0480928	0
Adductor mandibulae	ENSSSAG00000067196	ENSSSAT00000175033	tieg3	0.0480928	0
Adductor mandibulae	ENSSSAG00000073638	ENSSSAT00000163243	NA	0.0327068	0.0433242
Adductor mandibulae	ENSSSAG00000078063	ENSSSAT00000145665	PPP6R2	0.0480928	0.0155429
Adductor mandibulae	ENSSSAG00000080995	ENSSSAT00000154326	NA	0.0190098	0.00147125
Adductor mandibulae	ENSSSAG00000083851	ENSSSAT00000068879	NA	7.75e-06	0.0162726
Adductor mandibulae	ENSSSAG00000083851	ENSSSAT00000068942	NA	7.75e-06	0.000112176
Adductor mandibulae	ENSSSAG00000088778	ENSSSAT00000232396	NA	7.75e-06	0.000209671
Adductor mandibulae	ENSSSAG00000088778	ENSSSAT00000186145	NA	7.75e-06	0.00213721
Adductor mandibulae	ENSSSAG00000112044	ENSSSAT00000222000	NA	0.0449366	0
Adductor mandibulae	ENSSSAG00000112044	ENSSSAT00000245497	NA	0.0449366	0
Filet	ENSSSAG00000007700	ENSSSAT00000201383	NA	0.03603	0
Filet	ENSSSAG00000007700	ENSSSAT00000016978	NA	0.03603	0
Filet	ENSSSAG00000009617	ENSSSAT00000021111	NA	0.0169851	0
Filet	ENSSSAG00000009617	ENSSSAT00000224448	NA	0.0169851	0
Filet	ENSSSAG00000043713	ENSSSAT00000082177	NA	0.0083993	0
Filet	ENSSSAG00000043713	ENSSSAT00000083599	NA	0.0083993	0
Filet	ENSSSAG00000046942	ENSSSAT00000076981	NA	1.21e-10	0
Filet	ENSSSAG00000046942	ENSSSAT00000075790	NA	1.21e-10	0
Filet	ENSSSAG00000049613	ENSSSAT00000200486	vwa1	0.037526	0
Filet	ENSSSAG00000049613	ENSSSAT00000077313	vwa1	0.037526	0
Filet	ENSSSAG00000051533	ENSSSAT00000061586	pgcp	0.0264836	0
Filet	ENSSSAG00000051533	ENSSSAT00000080685	pgcp	0.0264836	0
Filet	ENSSSAG00000051905	ENSSSAT00000081669	NA	0.00537907	0
Filet	ENSSSAG00000051905	ENSSSAT00000200274	NA	0.00537907	0
Filet	ENSSSAG00000064355	ENSSSAT00000202528	CTNNBL1	0.0121303	0	x
Filet	ENSSSAG00000064355	ENSSSAT00000108065	CTNNBL1	0.0121303	0	x
Filet	ENSSSAG00000069245	ENSSSAT00000122243	RECQL	0.000423373	0
Filet	ENSSSAG00000069245	ENSSSAT00000122335	RECQL	0.000423373	0
Filet	ENSSSAG00000069647	ENSSSAT00000121149	HLCS	0.0083993	0
Filet	ENSSSAG00000069647	ENSSSAT00000248689	HLCS	0.0083993	0
Filet	ENSSSAG00000071586	ENSSSAT00000127241	met	0.00841767	0
Filet	ENSSSAG00000071586	ENSSSAT00000127246	met	0.00841767	0
Filet	ENSSSAG00000078813	ENSSSAT00000190920	spartb	0.019902	0
Filet	ENSSSAG00000078813	ENSSSAT00000214210	spartb	0.019902	0
Filet	ENSSSAG00000080633	ENSSSAT00000164057	ODAD2	0.0121303	0.00027676
Filet	ENSSSAG00000086179	ENSSSAT00000010664	sec62	0.0355446	0
Filet	ENSSSAG00000086179	ENSSSAT00000177430	sec62	0.0355446	0
Filet	ENSSSAG00000088069	ENSSSAT00000088293	NA	0.0083993	0
Filet	ENSSSAG00000088069	ENSSSAT00000184887	NA	0.0083993	0
Filet	ENSSSAG00000095492	ENSSSAT00000199306	tfeb	0.0401759	0
Filet	ENSSSAG00000095492	ENSSSAT00000186404	tfeb	0.0401759	0
Filet	ENSSSAG00000098868	ENSSSAT00000199993	NA	0.0193127	0
Filet	ENSSSAG00000098868	ENSSSAT00000253903	NA	0.0193127	0
Filet	ENSSSAG00000110525	ENSSSAT00000233715	NA	0.0163487	0
Filet	ENSSSAG00000110525	ENSSSAT00000214528	NA	0.0163487	0
Filet	ENSSSAG00000111523	ENSSSAT00000189645	NA	0.0193127	0
Filet	ENSSSAG00000111523	ENSSSAT00000172612	NA	0.0193127	0
Heart	ENSSSAG00000000276	ENSSSAT00000000635	NA	0.044887	0
Heart	ENSSSAG00000000276	ENSSSAT00000000734	NA	0.044887	0
Heart	ENSSSAG00000000924	ENSSSAT00000002042	NA	0.0159188	0
Heart	ENSSSAG00000000924	ENSSSAT00000001986	NA	0.0159188	0
Heart	ENSSSAG00000001253	ENSSSAT00000002586	NA	0.0267177	0.00325038
Heart	ENSSSAG00000001256	ENSSSAT00000237955	cssa01h1orf101	0.000252448	6.24e-07
Heart	ENSSSAG00000002007	ENSSSAT00000006089	usp45	0.00189143	0
Heart	ENSSSAG00000002007	ENSSSAT00000006265	usp45	0.00189143	0
Heart	ENSSSAG00000002372	ENSSSAT00000249568	tmod1	0.00837999	0.0387306	x
Heart	ENSSSAG00000002987	ENSSSAT00000018750	NA	3.72e-13	2.17e-16
Heart	ENSSSAG00000002987	ENSSSAT00000018653	NA	3.72e-13	0.00280401
Heart	ENSSSAG00000003442	ENSSSAT00000007400	dedd2	0.00218453	0.00324034
Heart	ENSSSAG00000003846	ENSSSAT00000195963	NA	0.000397924	0.0130709
Heart	ENSSSAG00000003846	ENSSSAT00000157848	NA	0.000397924	0.00838806
Heart	ENSSSAG00000004301	ENSSSAT00000215380	NA	0.00799785	0.000737312
Heart	ENSSSAG00000006140	ENSSSAT00000080627	NA	0.0140647	0.0010148
Heart	ENSSSAG00000006332	ENSSSAT00000019813	NA	0.0246051	0
Heart	ENSSSAG00000006332	ENSSSAT00000019159	NA	0.0246051	0
Heart	ENSSSAG00000006660	ENSSSAT00000172902	NA	0.0465133	0
Heart	ENSSSAG00000006660	ENSSSAT00000014215	NA	0.0465133	0
Heart	ENSSSAG00000006779	ENSSSAT00000015203	plcg2	0.000684416	0
Heart	ENSSSAG00000006779	ENSSSAT00000015192	plcg2	0.000684416	0
Heart	ENSSSAG00000007346	ENSSSAT00000016206	NA	0.0215923	0
Heart	ENSSSAG00000007346	ENSSSAT00000016220	NA	0.0215923	0
Heart	ENSSSAG00000007833	ENSSSAT00000017359	fdft1	0.0126951	0.00233825
Heart	ENSSSAG00000008166	ENSSSAT00000213117	NA	0.0272651	0.00717202
Heart	ENSSSAG00000008624	ENSSSAT00000019272	znf143b	0.00455203	0
Heart	ENSSSAG00000008624	ENSSSAT00000019288	znf143b	0.00455203	0
Heart	ENSSSAG00000008705	ENSSSAT00000196172	NA	0.00690848	0
Heart	ENSSSAG00000008705	ENSSSAT00000194054	NA	0.00690848	0
Heart	ENSSSAG00000009631	ENSSSAT00000021146	SFRS5	0.0226058	0
Heart	ENSSSAG00000009631	ENSSSAT00000251184	SFRS5	0.0226058	0
Heart	ENSSSAG00000010201	ENSSSAT00000024929	IQSEC1	0.00018949	4.56e-06
Heart	ENSSSAG00000010221	ENSSSAT00000023045	NA	0.0377961	0
Heart	ENSSSAG00000010221	ENSSSAT00000023200	NA	0.0377961	0
Heart	ENSSSAG00000014017	ENSSSAT00000114392	DYRK4	0.0373325	0
Heart	ENSSSAG00000014017	ENSSSAT00000029467	DYRK4	0.0373325	0
Heart	ENSSSAG00000015779	ENSSSAT00000208489	NA	0.0314571	0.0130948
Heart	ENSSSAG00000020439	ENSSSAT00000064182	syn2a	0.0344321	0
Heart	ENSSSAG00000020439	ENSSSAT00000196313	syn2a	0.0344321	0
Heart	ENSSSAG00000027979	ENSSSAT00000043201	NA	0.0389548	0.00270136
Heart	ENSSSAG00000029308	ENSSSAT00000045402	NA	0.0100984	0.0115782
Heart	ENSSSAG00000030157	ENSSSAT00000056458	eml1	0.0030489	0.00343236
Heart	ENSSSAG00000031513	ENSSSAT00000046493	NA	0.0195712	0
Heart	ENSSSAG00000031513	ENSSSAT00000046411	NA	0.0195712	0
Heart	ENSSSAG00000033263	ENSSSAT00000089506	NA	0.0140647	0
Heart	ENSSSAG00000033263	ENSSSAT00000088751	NA	0.0140647	0
Heart	ENSSSAG00000038956	ENSSSAT00000207286	clcn3	0.00620759	0
Heart	ENSSSAG00000038956	ENSSSAT00000068982	clcn3	0.00620759	0
Heart	ENSSSAG00000039545	ENSSSAT00000239726	NA	0.000512095	0
Heart	ENSSSAG00000039545	ENSSSAT00000055533	NA	0.000512095	0
Heart	ENSSSAG00000039610	ENSSSAT00000231818	NA	1.91e-07	0.000535318
Heart	ENSSSAG00000039610	ENSSSAT00000219851	NA	1.91e-07	3.49e-10
Heart	ENSSSAG00000040125	ENSSSAT00000056596	PRUNE1	0.003533	0
Heart	ENSSSAG00000040125	ENSSSAT00000056567	PRUNE1	0.003533	0
Heart	ENSSSAG00000040524	ENSSSAT00000226703	NA	0.00410148	0.00373219
Heart	ENSSSAG00000040524	ENSSSAT00000057410	NA	0.00410148	0.0109337
Heart	ENSSSAG00000040539	ENSSSAT00000057660	NA	0.0333302	0
Heart	ENSSSAG00000040539	ENSSSAT00000057810	NA	0.0333302	0
Heart	ENSSSAG00000041584	ENSSSAT00000060789	NA	0.0100612	0.0113301
Heart	ENSSSAG00000043638	ENSSSAT00000210510	NA	8.01e-16	1.23e-05
Heart	ENSSSAG00000043638	ENSSSAT00000066086	NA	8.01e-16	2.56e-18
Heart	ENSSSAG00000043752	ENSSSAT00000200081	NA	0.0293541	0.010797
Heart	ENSSSAG00000044127	ENSSSAT00000219973	NA	0.00332619	0.00138209
Heart	ENSSSAG00000045558	ENSSSAT00000073193	NA	0.0256756	0.00572567
Heart	ENSSSAG00000046825	ENSSSAT00000071825	kdrl	0.0126951	0
Heart	ENSSSAG00000046825	ENSSSAT00000204606	kdrl	0.0126951	0
Heart	ENSSSAG00000047199	ENSSSAT00000228983	NA	0.00885392	0.00186783
Heart	ENSSSAG00000047944	ENSSSAT00000074847	acot11a	0.0333302	0.00525887
Heart	ENSSSAG00000048288	ENSSSAT00000075040	NA	0.0140647	0.00146878
Heart	ENSSSAG00000048566	ENSSSAT00000193432	NA	0.00316317	0
Heart	ENSSSAG00000048566	ENSSSAT00000075375	NA	0.00316317	0
Heart	ENSSSAG00000048727	ENSSSAT00000088671	NA	0.0486469	0.00839089
Heart	ENSSSAG00000048770	ENSSSAT00000015931	NA	4.26e-07	3.96e-09
Heart	ENSSSAG00000048873	ENSSSAT00000090192	NA	0.0100984	0.000515573
Heart	ENSSSAG00000049427	ENSSSAT00000077516	NA	0.0343816	0.00275323
Heart	ENSSSAG00000049761	ENSSSAT00000173335	NA	0.0105605	0
Heart	ENSSSAG00000049761	ENSSSAT00000077642	NA	0.0105605	0
Heart	ENSSSAG00000050878	ENSSSAT00000079613	FLVCR2	0.00837999	0
Heart	ENSSSAG00000050878	ENSSSAT00000238451	FLVCR2	0.00837999	0
Heart	ENSSSAG00000051436	ENSSSAT00000166403	nbn	4.09e-07	0
Heart	ENSSSAG00000051436	ENSSSAT00000080532	nbn	4.09e-07	0
Heart	ENSSSAG00000051574	ENSSSAT00000162983	atraid	0.0121739	0
Heart	ENSSSAG00000051574	ENSSSAT00000203184	atraid	0.0121739	0
Heart	ENSSSAG00000053010	ENSSSAT00000084060	PPP1R9A	0.0131758	0
Heart	ENSSSAG00000053010	ENSSSAT00000083769	PPP1R9A	0.0131758	0
Heart	ENSSSAG00000053833	ENSSSAT00000085619	RAPGEF1	0.0256515	0.0138387
Heart	ENSSSAG00000054297	ENSSSAT00000087539	NA	0.00196708	0
Heart	ENSSSAG00000054297	ENSSSAT00000087683	NA	0.00196708	0
Heart	ENSSSAG00000054650	ENSSSAT00000101605	NA	0.0140647	0.00715179
Heart	ENSSSAG00000054650	ENSSSAT00000101396	NA	0.0140647	0.018056
Heart	ENSSSAG00000054744	ENSSSAT00000087497	lrrc2	0.0223938	0
Heart	ENSSSAG00000054744	ENSSSAT00000184556	lrrc2	0.0223938	0
Heart	ENSSSAG00000055993	ENSSSAT00000159001	tmem177	1.14e-05	0.00198826
Heart	ENSSSAG00000056934	ENSSSAT00000201101	NA	0.00470961	0.00010248
Heart	ENSSSAG00000057708	ENSSSAT00000094374	cdc123	0.0108963	0.000372112
Heart	ENSSSAG00000057946	ENSSSAT00000095799	uqcrc2b	0.0140647	0.00167944
Heart	ENSSSAG00000058616	ENSSSAT00000097046	NA	0.00130189	0
Heart	ENSSSAG00000058616	ENSSSAT00000096952	NA	0.00130189	0
Heart	ENSSSAG00000058968	ENSSSAT00000012277	kcnip1b	0.0113355	0
Heart	ENSSSAG00000058968	ENSSSAT00000199120	kcnip1b	0.0113355	0
Heart	ENSSSAG00000061643	ENSSSAT00000182556	NA	0.00851918	0.0157385
Heart	ENSSSAG00000062585	ENSSSAT00000104858	TYK2	0.00112049	1.45e-05
Heart	ENSSSAG00000063122	ENSSSAT00000249077	NA	0.0306083	0.00271139
Heart	ENSSSAG00000063711	ENSSSAT00000105175	NA	0.0370061	0.0138398
Heart	ENSSSAG00000063815	ENSSSAT00000214604	NA	0.0267177	0
Heart	ENSSSAG00000063815	ENSSSAT00000105299	NA	0.0267177	0
Heart	ENSSSAG00000065744	ENSSSAT00000118311	PRKCZ	0.0215923	0.0021216
Heart	ENSSSAG00000066310	ENSSSAT00000112241	NA	0.00744814	0
Heart	ENSSSAG00000066310	ENSSSAT00000112465	NA	0.00744814	0
Heart	ENSSSAG00000066736	ENSSSAT00000118682	magi1b	0.00283058	0.000551556
Heart	ENSSSAG00000066736	ENSSSAT00000187267	magi1b	0.00283058	0.0150143
Heart	ENSSSAG00000067417	ENSSSAT00000117519	PLEKHH2	0.00255102	0.00129202
Heart	ENSSSAG00000067500	ENSSSAT00000116687	DGKH	0.00165091	0
Heart	ENSSSAG00000067500	ENSSSAT00000116623	DGKH	0.00165091	0
Heart	ENSSSAG00000067552	ENSSSAT00000115305	PROF2	0.0253565	0
Heart	ENSSSAG00000067552	ENSSSAT00000115302	PROF2	0.0253565	0
Heart	ENSSSAG00000067624	ENSSSAT00000068651	NA	0.0153208	0
Heart	ENSSSAG00000067624	ENSSSAT00000163255	NA	0.0153208	0
Heart	ENSSSAG00000067880	ENSSSAT00000119531	NA	0.0237271	0.00854904
Heart	ENSSSAG00000067880	ENSSSAT00000119514	NA	0.0237271	0.0158913
Heart	ENSSSAG00000068056	ENSSSAT00000131203	DPYSL2	0.0050491	0.0447877
Heart	ENSSSAG00000068056	ENSSSAT00000131209	DPYSL2	0.0050491	0.030139
Heart	ENSSSAG00000068065	ENSSSAT00000116934	NA	0.00283058	0.00304977
Heart	ENSSSAG00000068065	ENSSSAT00000116908	NA	0.00283058	0.000565148
Heart	ENSSSAG00000068630	ENSSSAT00000122217	pfkfb4b	0.024372	0
Heart	ENSSSAG00000068630	ENSSSAT00000063489	pfkfb4b	0.024372	0
Heart	ENSSSAG00000068698	ENSSSAT00000242666	si:dkey-228d14.5	0.000158304	0
Heart	ENSSSAG00000068698	ENSSSAT00000123986	si:dkey-228d14.5	0.000158304	0
Heart	ENSSSAG00000068850	ENSSSAT00000234204	NA	0.000669284	1.52e-05
Heart	ENSSSAG00000069698	ENSSSAT00000121326	ADGRA3	1.14e-05	0
Heart	ENSSSAG00000069698	ENSSSAT00000121316	ADGRA3	1.14e-05	0
Heart	ENSSSAG00000069965	ENSSSAT00000125139	psmc5	0.00165091	5.69e-05
Heart	ENSSSAG00000070588	ENSSSAT00000123655	k0841	0.00274353	0
Heart	ENSSSAG00000070588	ENSSSAT00000123642	k0841	0.00274353	0
Heart	ENSSSAG00000071028	ENSSSAT00000139118	NA	0.000512095	0
Heart	ENSSSAG00000071028	ENSSSAT00000124958	NA	0.000512095	0
Heart	ENSSSAG00000071066	ENSSSAT00000125001	ndfip2	0.00279294	0.000288147
Heart	ENSSSAG00000071733	ENSSSAT00000126872	NA	0.0348565	0
Heart	ENSSSAG00000071733	ENSSSAT00000126880	NA	0.0348565	0
Heart	ENSSSAG00000072080	ENSSSAT00000127826	NA	0.0140647	0
Heart	ENSSSAG00000072080	ENSSSAT00000189158	NA	0.0140647	0
Heart	ENSSSAG00000072083	ENSSSAT00000134477	dclk2a	0.0357322	0
Heart	ENSSSAG00000072083	ENSSSAT00000133915	dclk2a	0.0357322	0
Heart	ENSSSAG00000072159	ENSSSAT00000139062	NA	0.000124978	0.000139061
Heart	ENSSSAG00000072159	ENSSSAT00000139334	NA	0.000124978	0.0222117
Heart	ENSSSAG00000072918	ENSSSAT00000130349	EDIL3	2.14e-05	0.0333227
Heart	ENSSSAG00000072918	ENSSSAT00000170842	EDIL3	2.14e-05	9.23e-07
Heart	ENSSSAG00000073286	ENSSSAT00000212037	NA	0.0097306	0
Heart	ENSSSAG00000073286	ENSSSAT00000131351	NA	0.0097306	0
Heart	ENSSSAG00000073727	ENSSSAT00000116093	erap2	0.000569844	0
Heart	ENSSSAG00000073727	ENSSSAT00000132718	erap2	0.000569844	0
Heart	ENSSSAG00000074143	ENSSSAT00000252059	ints11	6.46e-06	3.83e-08
Heart	ENSSSAG00000074638	ENSSSAT00000135432	xylb	0.019094	0.00897036
Heart	ENSSSAG00000074638	ENSSSAT00000135417	xylb	0.019094	0.00851379
Heart	ENSSSAG00000075060	ENSSSAT00000136651	NA	1.44e-12	4.65e-08
Heart	ENSSSAG00000075060	ENSSSAT00000214036	NA	1.44e-12	2.52e-09
Heart	ENSSSAG00000075232	ENSSSAT00000137759	acss2	0.020585	0
Heart	ENSSSAG00000075232	ENSSSAT00000184302	acss2	0.020585	0
Heart	ENSSSAG00000075233	ENSSSAT00000137076	NA	0.00856418	0
Heart	ENSSSAG00000075233	ENSSSAT00000137084	NA	0.00856418	0
Heart	ENSSSAG00000075648	ENSSSAT00000138152	pcdh15a	0.0125912	0.00213154
Heart	ENSSSAG00000075761	ENSSSAT00000145706	WWP1	0.0344794	0
Heart	ENSSSAG00000075761	ENSSSAT00000145720	WWP1	0.0344794	0
Heart	ENSSSAG00000075845	ENSSSAT00000141146	NA	0.0269712	0
Heart	ENSSSAG00000075845	ENSSSAT00000140055	NA	0.0269712	0
Heart	ENSSSAG00000076163	ENSSSAT00000139826	RPS6KB1	3.07e-06	2.91e-06
Heart	ENSSSAG00000076163	ENSSSAT00000171481	RPS6KB1	3.07e-06	0.0265812
Heart	ENSSSAG00000076268	ENSSSAT00000140489	NA	0.0189192	0.00181051
Heart	ENSSSAG00000076912	ENSSSAT00000141914	NA	0.0332633	0
Heart	ENSSSAG00000076912	ENSSSAT00000141927	NA	0.0332633	0
Heart	ENSSSAG00000078401	ENSSSAT00000198170	gnb5b	0.027896	0
Heart	ENSSSAG00000078401	ENSSSAT00000053706	gnb5b	0.027896	0
Heart	ENSSSAG00000078683	ENSSSAT00000147214	slc30a4	0.000181358	0
Heart	ENSSSAG00000078683	ENSSSAT00000147231	slc30a4	0.000181358	0
Heart	ENSSSAG00000078793	ENSSSAT00000147569	NA	0.00638674	0
Heart	ENSSSAG00000078793	ENSSSAT00000147591	NA	0.00638674	0
Heart	ENSSSAG00000079642	ENSSSAT00000224885	RHOF	0.00057369	1.01e-05
Heart	ENSSSAG00000080586	ENSSSAT00000154167	snrnp200	0.000564875	2.69e-06
Heart	ENSSSAG00000081467	ENSSSAT00000155692	gpc6b	0.0460616	0
Heart	ENSSSAG00000081467	ENSSSAT00000155694	gpc6b	0.0460616	0
Heart	ENSSSAG00000081484	ENSSSAT00000184253	ndrg3a	0.0025777	8.15e-05
Heart	ENSSSAG00000081613	ENSSSAT00000204315	gtdc1	0.029712	0.00409836
Heart	ENSSSAG00000081689	ENSSSAT00000156384	rnf34a	0.0377961	0
Heart	ENSSSAG00000081689	ENSSSAT00000212717	rnf34a	0.0377961	0
Heart	ENSSSAG00000082569	ENSSSAT00000201202	calcrla	4.26e-07	0
Heart	ENSSSAG00000082569	ENSSSAT00000194193	calcrla	4.26e-07	0
Heart	ENSSSAG00000082997	ENSSSAT00000185067	NA	0.0404228	0.0317726
Heart	ENSSSAG00000083121	ENSSSAT00000206605	NA	0.0357322	0
Heart	ENSSSAG00000083121	ENSSSAT00000216403	NA	0.0357322	0
Heart	ENSSSAG00000083304	ENSSSAT00000247159	NA	0.0256515	0
Heart	ENSSSAG00000083304	ENSSSAT00000254365	NA	0.0256515	0
Heart	ENSSSAG00000084525	ENSSSAT00000251043	atp5if1a	0.00677948	0
Heart	ENSSSAG00000084525	ENSSSAT00000181544	atp5if1a	0.00677948	0
Heart	ENSSSAG00000084844	ENSSSAT00000232302	NA	8.19e-06	0
Heart	ENSSSAG00000084844	ENSSSAT00000209325	NA	8.19e-06	0
Heart	ENSSSAG00000085167	ENSSSAT00000183857	NA	0.00866925	0.00310432
Heart	ENSSSAG00000085575	ENSSSAT00000211819	NA	0.0460616	0
Heart	ENSSSAG00000085575	ENSSSAT00000196281	NA	0.0460616	0
Heart	ENSSSAG00000086888	ENSSSAT00000160210	NA	0.00470961	0
Heart	ENSSSAG00000086888	ENSSSAT00000187121	NA	0.00470961	0
Heart	ENSSSAG00000086998	ENSSSAT00000176698	B3GALT2	0.00316317	0
Heart	ENSSSAG00000086998	ENSSSAT00000220398	B3GALT2	0.00316317	0
Heart	ENSSSAG00000088864	ENSSSAT00000214662	NA	0.0015643	0.00017648
Heart	ENSSSAG00000089238	ENSSSAT00000252271	NA	0.0194808	0
Heart	ENSSSAG00000089238	ENSSSAT00000170309	NA	0.0194808	0
Heart	ENSSSAG00000090198	ENSSSAT00000142705	NA	0.0223938	0.0364313
Heart	ENSSSAG00000090335	ENSSSAT00000162456	NA	0.0114097	0
Heart	ENSSSAG00000090335	ENSSSAT00000191501	NA	0.0114097	0
Heart	ENSSSAG00000091367	ENSSSAT00000227396	NA	0.0315014	0
Heart	ENSSSAG00000091367	ENSSSAT00000236251	NA	0.0315014	0
Heart	ENSSSAG00000092017	ENSSSAT00000216160	NA	0.0226058	0.0276412
Heart	ENSSSAG00000093827	ENSSSAT00000210966	NA	0.00885392	0
Heart	ENSSSAG00000093827	ENSSSAT00000174617	NA	0.00885392	0
Heart	ENSSSAG00000094876	ENSSSAT00000053693	NA	0.00374038	0.000139347
Heart	ENSSSAG00000095508	ENSSSAT00000231322	NA	0.0197336	0
Heart	ENSSSAG00000095508	ENSSSAT00000240247	NA	0.0197336	0
Heart	ENSSSAG00000095584	ENSSSAT00000228890	NA	0.0366838	0
Heart	ENSSSAG00000095584	ENSSSAT00000157629	NA	0.0366838	0
Heart	ENSSSAG00000095651	ENSSSAT00000059821	dpf1	1.14e-05	9.3e-09
Heart	ENSSSAG00000096019	ENSSSAT00000216835	nfia	0.0382098	0.00671119
Heart	ENSSSAG00000096464	ENSSSAT00000187112	ptdss1a	0.0140647	0
Heart	ENSSSAG00000096464	ENSSSAT00000216825	ptdss1a	0.0140647	0
Heart	ENSSSAG00000096555	ENSSSAT00000232489	NA	0.0050491	0
Heart	ENSSSAG00000096555	ENSSSAT00000166919	NA	0.0050491	0
Heart	ENSSSAG00000097258	ENSSSAT00000160425	NA	0.0463958	0
Heart	ENSSSAG00000097258	ENSSSAT00000186851	NA	0.0463958	0
Heart	ENSSSAG00000098348	ENSSSAT00000241422	NA	0.00470961	0.000697205
Heart	ENSSSAG00000100753	ENSSSAT00000118915	NA	0.00577274	0.0014284
Heart	ENSSSAG00000101364	ENSSSAT00000168246	NA	0.00149794	0
Heart	ENSSSAG00000101364	ENSSSAT00000191994	NA	0.00149794	0
Heart	ENSSSAG00000101781	ENSSSAT00000159105	chrm2a	0.00449878	0.0145275
Heart	ENSSSAG00000101781	ENSSSAT00000191110	chrm2a	0.00449878	0.0124371
Heart	ENSSSAG00000101971	ENSSSAT00000168612	NA	0.00189143	0
Heart	ENSSSAG00000101971	ENSSSAT00000157304	NA	0.00189143	0
Heart	ENSSSAG00000102397	ENSSSAT00000105073	NA	0.00262233	0
Heart	ENSSSAG00000102397	ENSSSAT00000027437	NA	0.00262233	0
Heart	ENSSSAG00000104646	ENSSSAT00000191313	tppp3	0.0333694	0.0461762
Heart	ENSSSAG00000105545	ENSSSAT00000192946	NA	0.0168322	0.00368556
Heart	ENSSSAG00000107179	ENSSSAT00000184186	NA	0.00607016	0
Heart	ENSSSAG00000107179	ENSSSAT00000163455	NA	0.00607016	0
Heart	ENSSSAG00000108099	ENSSSAT00000207774	NA	0.0104578	0
Heart	ENSSSAG00000108099	ENSSSAT00000160751	NA	0.0104578	0
Heart	ENSSSAG00000108826	ENSSSAT00000206529	NA	0.0146885	0
Heart	ENSSSAG00000108826	ENSSSAT00000176430	NA	0.0146885	0
Heart	ENSSSAG00000109569	ENSSSAT00000186612	NA	0.000512095	1.17e-05
Heart	ENSSSAG00000110263	ENSSSAT00000210941	NA	0.0272651	0
Heart	ENSSSAG00000110263	ENSSSAT00000200811	NA	0.0272651	0
Heart	ENSSSAG00000110317	ENSSSAT00000180182	NA	0.00955965	0.00314893
Heart	ENSSSAG00000110317	ENSSSAT00000067485	NA	0.00955965	0.00237455
Heart	ENSSSAG00000110322	ENSSSAT00000197654	NA	0.0357322	0
Heart	ENSSSAG00000110322	ENSSSAT00000249980	NA	0.0357322	0
Heart	ENSSSAG00000110961	ENSSSAT00000216827	NA	1.69e-05	0.0255134
Heart	ENSSSAG00000110961	ENSSSAT00000251538	NA	1.69e-05	0.0477627
Heart	ENSSSAG00000111428	ENSSSAT00000227077	NEK6	0.0257541	0.00561906
Heart	ENSSSAG00000112072	ENSSSAT00000167825	nsun3	0.0327428	0
Heart	ENSSSAG00000112072	ENSSSAT00000233886	nsun3	0.0327428	0
Heart	ENSSSAG00000112920	ENSSSAT00000190041	NA	0.00468587	0
Heart	ENSSSAG00000112920	ENSSSAT00000164234	NA	0.00468587	0
Heart	ENSSSAG00000113472	ENSSSAT00000237467	NA	0.0015643	0
Heart	ENSSSAG00000113472	ENSSSAT00000238234	NA	0.0015643	0
Heart	ENSSSAG00000113827	ENSSSAT00000207493	NA	0.0195712	0.0050604
Heart	ENSSSAG00000115759	ENSSSAT00000127453	NA	0.00210245	2.25e-05
Heart	ENSSSAG00000115997	ENSSSAT00000172190	NA	0.0219076	0
Heart	ENSSSAG00000115997	ENSSSAT00000245067	NA	0.0219076	0
Heart	ENSSSAG00000116004	ENSSSAT00000001082	vps29	0.000139505	0
Heart	ENSSSAG00000116004	ENSSSAT00000212163	vps29	0.000139505	0
Heart	ENSSSAG00000118758	ENSSSAT00000254041	ppp1r3cb	0.00316317	0
Heart	ENSSSAG00000118758	ENSSSAT00000213975	ppp1r3cb	0.00316317	0
Heart	ENSSSAG00000119021	ENSSSAT00000188959	NA	0.0015643	4.48e-05
Heart	ENSSSAG00000119673	ENSSSAT00000192441	NA	0.0215923	0
Heart	ENSSSAG00000119673	ENSSSAT00000238011	NA	0.0215923	0
Heart	ENSSSAG00000120584	ENSSSAT00000176958	NA	0.0304551	0
Heart	ENSSSAG00000120584	ENSSSAT00000199461	NA	0.0304551	0
Heart	ENSSSAG00000122010	ENSSSAT00000227258	NA	0.00916746	0
Heart	ENSSSAG00000122010	ENSSSAT00000247825	NA	0.00916746	0
Heart	ENSSSAG00000122105	ENSSSAT00000179172	NA	0.0404991	0
Heart	ENSSSAG00000122105	ENSSSAT00000247668	NA	0.0404991	0
Stomach	ENSSSAG00000006363	ENSSSAT00000014397	mepd	0.00113827	0
Stomach	ENSSSAG00000006363	ENSSSAT00000014427	mepd	0.00113827	0
Stomach	ENSSSAG00000010034	ENSSSAT00000022074	sybu	0.0308326	0
Stomach	ENSSSAG00000010034	ENSSSAT00000022077	sybu	0.0308326	0
Stomach	ENSSSAG00000040562	ENSSSAT00000239205	parp8	0.0308326	0.00308926
Stomach	ENSSSAG00000046494	ENSSSAT00000072126	uhrf1	0.0224615	0
Stomach	ENSSSAG00000046494	ENSSSAT00000072155	uhrf1	0.0224615	0
Stomach	ENSSSAG00000048707	ENSSSAT00000075831	NA	0.0009639	0
Stomach	ENSSSAG00000048707	ENSSSAT00000075782	NA	0.0009639	0
Stomach	ENSSSAG00000049749	ENSSSAT00000077715	ubap2a	0.00113827	0.000252687
Stomach	ENSSSAG00000069488	ENSSSAT00000120744	adgrg6	0.0009639	0
Stomach	ENSSSAG00000069488	ENSSSAT00000120757	adgrg6	0.0009639	0
Stomach	ENSSSAG00000072197	ENSSSAT00000142891	actn3a	0.0308326	0.00267921
Stomach	ENSSSAG00000072820	ENSSSAT00000131632	lnpep	0.00140739	0.00250857
Stomach	ENSSSAG00000073029	ENSSSAT00000130557	NA	0.00140739	0
Stomach	ENSSSAG00000073029	ENSSSAT00000130563	NA	0.00140739	0
Stomach	ENSSSAG00000077811	ENSSSAT00000146074	NA	0.0308326	0
Stomach	ENSSSAG00000077811	ENSSSAT00000146214	NA	0.0308326	0
Stomach	ENSSSAG00000079685	ENSSSAT00000150337	nr5a2	1.6e-05	0
Stomach	ENSSSAG00000079685	ENSSSAT00000150333	nr5a2	1.6e-05	0
Stomach	ENSSSAG00000107815	ENSSSAT00000209688	NA	0.00113827	0.000174578
Stomach	ENSSSAG00000112244	ENSSSAT00000182542	NA	3.14e-07	0
Stomach	ENSSSAG00000112244	ENSSSAT00000239193	NA	3.14e-07	0

## Sheet: Supporting Info 4 - DAS
muscle	Type	ID	GeneID	geneSymbol	chr	PValue	FDR
Adductor mandibulae	A3SS	2012	ENSSSAG00000006531	cacna2d1a	chr17	3.8e-05	0.0441664
Adductor mandibulae	A3SS	3628	ENSSSAG00000064058	ybx1	chr13	4.77e-05	0.0441664
Adductor mandibulae	A3SS	5215	ENSSSAG00000062538	NA	chr10	4.35e-05	0.0441664
Adductor mandibulae	A3SS	6557	ENSSSAG00000085087	NA	chr9	1.46e-05	0.0441664
Adductor mandibulae	A3SS	8660	ENSSSAG00000111310	sox6	chr11	3.59e-05	0.0441664
Adductor mandibulae	MXE	3276	ENSSSAG00000105404	mknk2a	chr14	1.06e-05	0.0294823
Adductor mandibulae	MXE	3319	ENSSSAG00000064001	znf385b	chr25	2.99e-05	0.0415011
Adductor mandibulae	MXE	1885	ENSSSAG00000076783	abi3bpb	chr17	8.46e-05	0.0470429
Adductor mandibulae	MXE	2575	ENSSSAG00000042674	slc29a3	chr19	6.63e-05	0.0470429
Adductor mandibulae	MXE	2674	ENSSSAG00000115296	NA	chr12	8.24e-05	0.0470429
Adductor mandibulae	RI	2666	ENSSSAG00000093538	letm1	chr9	3.66e-05	0.0492546
Adductor mandibulae	RI	3438	ENSSSAG00000008349	LMNA	chr5	2.91e-05	0.0492546
Adductor mandibulae	RI	4244	ENSSSAG00000074534	NA	chr13	3.13e-05	0.0492546
Adductor mandibulae	RI	6153	ENSSSAG00000081458	med15	chr11	1.07e-05	0.0492546
Filet	A3SS	2521	ENSSSAG00000050808	cdc27	chr3	1.16e-06	0.00571643
Filet	A5SS	582	ENSSSAG00000061215	fancc	chr24	2.89e-06	0.0106092
Filet	A5SS	1387	ENSSSAG00000081105	rbbp5	chr22	3.82e-05	0.0487536
Filet	A5SS	4869	ENSSSAG00000042832	NA	chr11	4.66e-05	0.0487536
Filet	A5SS	6269	ENSSSAG00000002904	HDA1B	chr1	5.31e-05	0.0487536
Filet	MXE	1799	ENSSSAG00000007711	birc2	chr11	1.65e-05	0.0257277
Filet	MXE	4220	ENSSSAG00000025431	NA	chr21	1.19e-05	0.0257277
Filet	RI	3835	ENSSSAG00000007494	NA	chr13	7.1e-06	0.0402863
Stomach	A3SS	2450	ENSSSAG00000000660	dnm2a	chr3	6.69e-07	0.00335176
Stomach	A3SS	8610	ENSSSAG00000063213	NA	chr20	5.38e-06	0.0134837
Stomach	A3SS	3649	ENSSSAG00000114939	NA	chr11	2.7e-05	0.033788
Stomach	A3SS	10741	ENSSSAG00000075492	DHX8	chr28	2.43e-05	0.033788
Stomach	A3SS	184	ENSSSAG00000058579	BAHCC1	chr28	4.14e-05	0.034574
Stomach	A3SS	8466	ENSSSAG00000108050	GNB4	chr16	4.1e-05	0.034574
Stomach	A5SS	7484	ENSSSAG00000112936	pa2g4b	chr13	1.73e-06	0.00623788
Stomach	A5SS	4827	ENSSSAG00000002472	NA	chr9	1.51e-05	0.0223977
Stomach	A5SS	8380	ENSSSAG00000086919	gpr85	chr7	1.86e-05	0.0223977
Stomach	A5SS	3715	ENSSSAG00000065351	KATNB1	chr11	3.79e-05	0.0341724
Stomach	A5SS	175	ENSSSAG00000061232	lrpap1	chr8	8.04e-05	0.0362573
Stomach	A5SS	864	ENSSSAG00000100003	NA	chr23	5.36e-05	0.0362573
Stomach	A5SS	4270	ENSSSAG00000039268	lman1	chr13	6.27e-05	0.0362573
Stomach	A5SS	10237	ENSSSAG00000054248	st3gal4	chr20	7.34e-05	0.0362573
Stomach	A5SS	7053	ENSSSAG00000044844	nemp1	chr13	9.36e-05	0.0375284
Stomach	A5SS	9070	ENSSSAG00000074519	TLE3	chr11	0.00011034	0.0398106
Stomach	MXE	1833	ENSSSAG00000057059	msi2b	chr9	3.29e-05	0.0480905
Stomach	MXE	1899	ENSSSAG00000094510	NA	chr15	5.11e-05	0.0480905
Stomach	MXE	3233	ENSSSAG00000012790	TBC1D15	chr17	5.7e-05	0.0480905
Stomach	MXE	4498	ENSSSAG00000078739	NA	chr25	6.26e-05	0.0480905
Stomach	SE	2469	ENSSSAG00000061179	AOPEP	chr24	8.2e-06	0.0335434
Stomach	SE	18297	ENSSSAG00000008422	NA	chr13	7.11e-06	0.0335434
Stomach	SE	26004	ENSSSAG00000042440	fbxo46	chr9	1.02e-05	0.0335434
Stomach	SE	29000	ENSSSAG00000076196	rnft1	chr4	9.9e-06	0.0335434
Stomach	SE	34051	ENSSSAG00000063213	NA	chr20	5.61e-06	0.0335434
Stomach	SE	34572	ENSSSAG00000007939	eif4bb	chr12	1.76e-06	0.0335434
Stomach	SE	36135	ENSSSAG00000090428	tmem167a	chr1	2.9e-06	0.0335434
Stomach	SE	41838	ENSSSAG00000121022	NA	chr1	6.04e-06	0.0335434
Stomach	SE	14725	ENSSSAG00000081080	ARVCF	chr24	1.41e-05	0.0399789
Stomach	SE	33343	ENSSSAG00000059833	NA	chr14	1.53e-05	0.0399789
Stomach	SE	33113	ENSSSAG00000069437	psmb4	chr14	1.73e-05	0.0411281
Stomach	SE	40349	ENSSSAG00000030148	fhl5	chr11	1.88e-05	0.0411281
Heart	A3SS	9808	ENSSSAG00000006529	NA	chr16	1.02e-06	0.00588278
Heart	A5SS	11494	ENSSSAG00000001282	gtpbp1l	chr2	4.92e-06	0.0217666
Heart	A5SS	1114	ENSSSAG00000009118	celf1	chr26	2.23e-05	0.0493302
Heart	MXE	4298	ENSSSAG00000080405	NA	chr14	1.58e-07	0.000630913
Heart	MXE	4379	ENSSSAG00000071542	msi2b	chr20	2.37e-06	0.00448431
Heart	MXE	4986	ENSSSAG00000048272	NA	chr16	3.38e-06	0.00448431
Heart	MXE	3845	ENSSSAG00000012790	TBC1D15	chr17	2.37e-05	0.0235949
Heart	RI	7648	ENSSSAG00000121302	BAG5	chr9	2.95e-06	0.00923283
Heart	RI	8758	ENSSSAG00000005122	NA	chr14	2.27e-06	0.00923283
Heart	RI	2684	ENSSSAG00000093538	letm1	chr9	6.42e-06	0.0100562
Heart	RI	9838	ENSSSAG00000039266	ATAD3A	chr12	6.03e-06	0.0100562
Heart	RI	4054	ENSSSAG00000045387	NA	chr15	2.26e-05	0.0283182
Heart	RI	983	ENSSSAG00000008768	ddah1	chr23	3.8e-05	0.0339909
Heart	RI	3459	ENSSSAG00000064444	cltca	chr13	4.69e-05	0.0339909
Heart	RI	4662	ENSSSAG00000008579	fgd4a	chr10	6.51e-05	0.0339909
Heart	RI	6159	ENSSSAG00000072645	hectd1	chr1	6.28e-05	0.0339909
Heart	RI	6739	ENSSSAG00000081348	cog4	chr26	6.33e-05	0.0339909
Heart	RI	8830	ENSSSAG00000008028	ncor2	chr20	5.47e-05	0.0339909
Heart	RI	11562	ENSSSAG00000043053	NA	chr8	5.88e-05	0.0339909
Heart	RI	9333	ENSSSAG00000006599	top1a	chr12	8.25e-05	0.0397787
Heart	SE	1940	ENSSSAG00000080099	MLLT10	chr29	1.21e-08	0.000395015
Heart	SE	3077	ENSSSAG00000074897	NA	chr24	8.73e-08	0.000951516
Heart	SE	37944	ENSSSAG00000080405	NA	chr14	7.73e-08	0.000951516
Heart	SE	42431	ENSSSAG00000078886	nt5c2b	chr2	2.51e-07	0.00204872
Heart	SE	5255	ENSSSAG00000069768	CRY2	chr26	9.59e-07	0.00427879
Heart	SE	11247	ENSSSAG00000000320	NA	chr3	1.05e-06	0.00427879
Heart	SE	29706	ENSSSAG00000043329	NA	chr15	6.69e-07	0.00427879
Heart	SE	29707	ENSSSAG00000043329	NA	chr15	9.99e-07	0.00427879
Heart	SE	50638	ENSSSAG00000069629	prdx5	chr4	1.18e-06	0.00428875
Heart	SE	51467	ENSSSAG00000047997	NA	chr19	2.17e-06	0.00708717
Heart	SE	50575	ENSSSAG00000004716	flt2	chr4	3.07e-06	0.00911854
Heart	SE	21393	ENSSSAG00000116338	upf3b	chr9	4.09e-06	0.0102859
Heart	SE	49785	ENSSSAG00000078318	ARHGAP26	chr4	4e-06	0.0102859
Heart	SE	12356	ENSSSAG00000096020	AGAP1	chr17	4.66e-06	0.0108779
Heart	SE	10345	ENSSSAG00000093321	XPO4	chr25	7.56e-06	0.0154551
Heart	SE	36836	ENSSSAG00000111364	bin1b	chrCAJNNT020001151.1	7.25e-06	0.0154551
Heart	SE	42253	ENSSSAG00000014715	NA	chr20	1.09e-05	0.0209268
Heart	SE	30500	ENSSSAG00000005678	ATP10D	chr9	1.7e-05	0.0264317
Heart	SE	32986	ENSSSAG00000072393	NA	chr19	1.63e-05	0.0264317
Heart	SE	37138	ENSSSAG00000006918	NA	chr14	1.57e-05	0.0264317
Heart	SE	39720	ENSSSAG00000065661	fmnl3	chr15	1.49e-05	0.0264317
Heart	SE	31166	ENSSSAG00000078461	ogfod2	chr24	1.92e-05	0.0284695
Heart	SE	16238	ENSSSAG00000113262	NA	chr6	2.44e-05	0.0346454
Heart	SE	46217	ENSSSAG00000095162	slc25a10b	chr2	2.85e-05	0.0388848
Heart	SE	41110	ENSSSAG00000102088	smtnl1	chr5	2.99e-05	0.0390838
Heart	SE	9444	ENSSSAG00000097597	NA	chr29	3.49e-05	0.04386
Heart	SE	32400	ENSSSAG00000068977	NA	chr1	3.99e-05	0.0483802
Heart	SE	23004	ENSSSAG00000042518	NA	chr1	4.32e-05	0.0486112
Heart	SE	40375	ENSSSAG00000051984	NA	chr4	4.46e-05	0.0486112
Heart	SE	45762	ENSSSAG00000005229	NA	chr6	4.29e-05	0.0486112
